# Supplementary material
Source: PubMed Central journal article supplement (PMC6011234)
Supplement: NIHMS967476-supplement-Online_Data_Supplemental_Materials.pdf [file NIHMS967476-supplement-Online_Data_Supplemental_Materials.pdf]

# Proteomic Architecture of Human Coronary and Aortic

## Atherosclerosis: Supplemental Materials

### Expanded Methods

The data, analytic methods, and study materials are available to other researchers for purposes of reproducing the results or replicating procedures. Specifically, The DDA MS and the MRM MS data along with the Skyline document have been uploaded to Peptide Atlas. The Spectral Library used for DIA MS quantitation has also been uploaded to Peptide Atlas. The data can be accessed at <http://www.peptideatlas.org/PASS/PASS01066> or via FTP using the following credentials: Servername: <ftp.peptideatlas.org>; Username: PASS01066; Password: KV454u.

### Arterial Sample Acquisition and Pathology Grading Methods

Male and female cases of any race, aged 18-50 years (men) or 18-60 years (women) with no ante mortem clinical suspicion of coronary disease autopsied < 24 hours of death were eligible for inclusion. This report includes data from the first 100 adult coroner cases included in the study (age range: 15-55 yrs., 75% males, 67% White, 26% Black, 7% other). The Medico-Legal Death Investigators obtain signed family consent for retrieval of anatomic specimens prior to the autopsy. During the autopsy the pathologist dissects the aorta (ligamentum arteriosum to aortic bifurcation) and LAD and removes branching arteries and adventitial or epicardial adipose tissue. Both the aorta and LAD are opened longitudinally, cleansed of blood and photographed (**Supplemental Fig. 1**). In each of the regions to be sampled, the pathologist inspects the intimal surface and categorizes the type and percent involvement of the following atherosclerotic changes: a) fatty streaks (FS); b) fibrous plaques (FP); c) complicated lesions (CL); and d) calcified lesions (CO), and records the data on a data collection form. Consistent with the age and cause of death (trauma), the fibrous plaques were almost exclusively early lesions - only one specimen had any macroscopic evidence of calcification and <3% of samples had any evidence of plaque hemorrhage, ulceration or thrombosis. Next the pathologist collects up to 1

gram of tissue from each of three standardized sections of the thoracic and abdominal aorta and two sections from the coronary artery <sup>1</sup> (**Supplemental Fig. 1**). The specimens are snap frozen in cryotubes with liquid nitrogen and remain in a 34L VWR Cryogenic Dewar until transferred to a -80 freezer equipped with temperature alarms and automated generator back-up systems in the Department of Pathology at LSU. Additionally, targeted “pure” samples of grossly normal (non-lesion) and, if available, grossly atherosclerotic (lesion) are taken and divided into three 100mg portions and 1.) snap frozen, 2.) placed in RNALater solution and frozen, and 3.) placed in formalin and stored at room temperature for possible future immunohistochemistry analyses. A 50 gram sample of liver is also collected and frozen for future studies. All samples received at LSU are checked for label accuracy and entered in a database using an unlinked anonymous code for further processing, analyses and storage.

### **Protein Extraction, MS Analysis and Protein Identification**

Aorta and LAD tissues were pulverized in liquid nitrogen and homogenized in 8M urea, 2M thiourea, 4% CHAPs and 1% DTT using Dounce homogenizer for 100 strokes, centrifuged at 16000 rpm for 20 mins. These conditions will solubilize the majority of proteins except cross-linked extracellular matrix (ECM) proteins which require additional solubilization strategies not used here <sup>2, 3</sup> However, by using two different MS based methods we were able to obtain extensive coverage of soluble ECM proteins (**Supplemental Table 1**). Protein concentration of the supernatant was assessed by CB-X assay kit (G-Biosciences MO, USA). 100 µg of protein was precipitated using 2-D clean-up kit (GE Healthcare MA, USA) and then reconstitute in 6M urea, 50mM ammonium bicarbonate. The protein was reduced, alkylated and digested with trypsin (1:20). Peptides were desalted using Oasis HLB 96-well Plate (Waters MA, USA). A total of 2.0 µg of peptides per sample were then analyzed using label-free quantification on a reversed-phase liquid chromatography tandem mass spectrometry (RPLC–MS/MS) online with an Orbitrap Elite mass spectrometer (Thermo Scientific, USA) coupled to an Easy-nLC 1000 system (Thermo Scientific, USA). Peptides concentrated on a C18 trap column (Acclaim PepMap 100, 300 µm × 5 mm, C18, 5 µm, 100 Å; maximum pressure 800bar) in 0.1% TFA,

then separated on a C18 analytical column (Acclaim PepMap RSLC, 75  $\mu\text{m}$   $\times$  15 cm, nano Viper, C18, 2  $\mu\text{m}$ , 100  $\text{\AA}$ ) using a linear gradient from 5% to 35% solvent B over 155 mins (solvent A: 0.1% aqueous formic acid and solvent B: 0.1% formic acid in acetonitrile; flow rate 350 nL/min; column oven temperature 45  $^{\circ}\text{C}$ ). The analysis was operated in a data-dependent mode with full scan MS spectra acquired at a resolution of 60,000 in the Orbitrap analyzer, followed by tandem mass spectra of the 20 most abundant peaks in the linear ion trap after peptide fragmentation by collision-induced dissociation (CID).

To eliminate batch effect, the same parameters were used for mass spectra acquisition and the peptides from each individual were analyzed randomly in one batch. To minimize cross contamination, a blank run was performed between each sample. To monitor column performance, 200fmol BSA digested peptides were analyzed to make sure elution time of same peptide were within 0.2 minutes and signal intensity and total spectra counts variation were less than 10%. One LAD and one AA sample (from different subjects) were excluded because of poor protein yield leaving n=99 samples from each territory for analysis.

The MS/MS data obtained from the Orbitrap Elite were converted to mzXML and mgf format using Msconvert version 3.0.3858 from ProteoWizard<sup>4</sup> for peaklist generation. All data were searched using the X!Tandem<sup>5</sup> algorithm version 2009.10.01.1 and OMSSA<sup>6</sup> algorithm version 2.1.9. The dataset was searched against the concatenated target/decoy<sup>7</sup> Human Uniprot<sup>8</sup> database as of July 24, 2015, with only reviewed and canonical sequences used. The search parameters were as follows: Fixed modification of Carbamidomethyl (C) and variable modifications of Oxidation (M), Phosphorylation (STY); Enzyme: Trypsin with 2 maximum missed cleavages; Parent Tolerance: 0.050.08 Da; Fragment tolerance: 1.00 Da. Post-search analysis was performed using Trans Proteomic Pipeline<sup>9</sup> version v4.6, rev 1 with protein group and peptide probability thresholds set to 90% and 90%, respectively, and one or more distinct peptide required for identification. PeptideProphet<sup>10</sup> was used for peptide validation from each individual search algorithm and iProphet<sup>11</sup> was used to merge results from the separate algorithms and further refine the identification probabilities. Lastly, ProteinProphet<sup>12</sup> was then

used to infer protein identifications from the resulting combined peptide list and perform grouping of ambiguous hits. Protein Group and Peptide False Discovery Rates were calculated automatically using a target-decoy method for the above probability thresholds (0.72% and 0.06% respectively). Protein isoforms were only reported if a peptide comprising an amino acid sequence that was unique to the isoform was identified. Label-free quantification of each protein was performed using weighted spectral counting<sup>13</sup>. The distribution of protein spectral counts for each data file was inspected to verify equivalence in sample loading and instrument performance between files. Based on this analysis, a median normalization (adjustment of the raw spectral counts for each protein of a given file to the median of all spectral counts observed for the same file) was performed.

### **Post-processing Quality Control and Data Imputation**

A total of 1925 unambiguous proteins were detected in one or more of the 99 LAD samples. Of these proteins 944 had  $\leq 50\%$  missingness and 375 had no missingness in all 99 samples (**Supplemental Fig. 2**). PCA analysis of the 375 proteins with complete data from every sample failed to identify significant sample outliers or important batch effects (**Supplemental Fig. 2**). Missing values for the 944 proteins with  $\leq 50\%$  missingness were imputed using a low rank approximation derived from non-linear iterative partial least squares (NIPALS) PCA<sup>14</sup> (**Supplemental Fig. 2**). All subsequent analyses including regression, WCNA, and CAM were performed on this imputed data set. Exploratory regression analysis of proteins with  $> 50\%$  missingness using missingness encoding failed to identify proteins with compelling association with disease and these proteins were subsequently dropped from further consideration. In a similar manner the AA samples revealed 1495 unambiguous proteins including 725 with  $\leq 50\%$  missingness and no important batch effects or extreme outliers.

### **Analysis of Association with Extent of Atherosclerosis or Anatomic Location**

Three orthogonal strategies (regression, weighted co-expression analysis, convex analysis of mixtures) were employed to identify proteins individually or jointly associated with extent of disease or anatomic location.

*Regression Models:* MANOVA models with adjustment for age, sex, and race were used to model the joint distributions of % intimal surface demonstrating fibrous plaque (FP), streaks (FS), and normal (NL) intima as a function of each individual protein. Separately, generalized linear models (GLM) were used to examine the association between individual proteins and %FP or %NL after adjustment for age, sex, and race. In the models of %FP the reference was, by definition, the % intimal surface demonstrating fatty streaks or normal intima. In contrast, in models of %NL the reference was, by definition, the % intimal surface demonstrating fatty streaks or fibrous plaques. Accordingly we developed separate models using each trait (%FP or %NL) as the dependent variable with the expectation that direction of effect would be inversely related depending on the dependent variable used. Proteins with beta coefficients in the same direction for both %FP and %NL were excluded from further consideration. In a similar manner ordinal regression was also used to examine the association between individual proteins and % FP or % NL treated as three level ordinal variables (FP: 0%, 1-59%,  $\geq 60\%$ ; NL: 100%, 99-61%,  $< 60\%$ ). Exploratory models using robust GLM with logit link produced qualitatively similar lists of significantly associated proteins (data not shown).

When modeling the association between proteins identified using data-independent acquisition (SWATH) and disease or location we also adjusted for several housekeeping proteins (Proteasome subunit beta type-2, Small nuclear ribonucleoprotein Sm D3, Receptor expression-enhancing protein 5, Ras-related protein Rab-7a) and Myosin-11 (a vascular smooth muscle cell marker protein) to account for possible differences in tissue sample volumes, cellular composition, or protein yields.

*Weighted Co-Expression Network Modelling:* The WGCNA package in R was used to identify distinct protein modules among the 94 proteins used for analysis<sup>15</sup>. A weighted power adjacency matrix was constructed using signed bi-correlations between proteins and mapping

the results onto the 0-1 interval. The power parameter was selected such that the topological overlap connectivity ( $k$ ) of the entire network approximated a scale-free topology. The topological overlap was used to create a dissimilarity matrix for hierarchical clustering to identify modules. To assess stability of module assignments, 50 bootstrap samples of the data were created and each one interrogated using identical WCGNA parameters. Once the modules were determined, regression models were developed to examine the association between module eigengenes and the arterial phenotypes (%FP and % NL) after adjustment for age, sex, and race.

#### *Convex Analysis of Mixtures and Protein Expression Differences in Complex Tissues Analysis*

Tissue heterogeneity is present in our samples where multiple tissue types are variably mixed and co-exist<sup>16, 17</sup>, representing a major confounder when studying tissue-specific disease markers<sup>18-20</sup>. We have recently devised CAM, a fully unsupervised data deconvolution method that exploits the strong parallelism between a latent variable model and the theory of convex sets<sup>21</sup>. With the newly-proven mathematical theorems, we showed that the simplex of mixed expressions is a rotated and compressed version of the simplex of tissue expressions in scatter space<sup>22</sup> (**Fig. 3**). The vertices of the scatter simplex, characterized by the molecular markers whose expressions are maximally enriched in a particular tissue, define the optimal data-derived distinctive tissue types present in the heterogeneous samples. CAM has distinct advantages over other competing deconvolution methods (e.g. PCA, ICA, etc) because it can handle protein profiles that are not statistically independent or geometrically orthogonal and which are intrinsically non-negative.

CAM works by geometrically identifying the vertices (and their resident molecular markers) of the scatter simplex of globally measured expressions (**Fig. 3**), *i.e.*, determining the multifaceted simplex that most tightly encloses the mixed expression profiles, and subsequently estimating the proportions and specific expression profiles of constituent subpopulations<sup>22</sup> (**Fig. 3**). Tissue samples to be analyzed by CAM contain unknown number and varying proportions of molecularly distinctive (including novel) tissue types. Molecular expression in a specific tissue is

modeled as being linearly proportional to the abundance of that tissue and the number of tissues present is determined by the newly-derived minimum description length (MDL) criterion

22.

We first eliminate proteins whose signal intensity (vector norm) is lower than 5% (noise) or higher than 95% (outlier) of the mean value over all proteins. The signals from these proteins are unreliable and could have a negative impact on the subsequent deconvolution. Second, dimension reduction is performed on the raw measurements using principal component analysis with 10 PCs. To further reduce the impact of noise/outlier data points and permit appropriate parameterization of the MDL criterion to determine the number of tissues, we aggregate protein vectors into representative clusters using affinity propagation clustering (APC)<sup>23-25, 22</sup>. As an initialization-free and near-global-optimum clustering method, APC simultaneously considers all protein vectors as potential exemplars and recursively exchanges real-valued 'messages' between protein vectors until a high-quality set of exemplars and corresponding clusters gradually emerge. CAM detected four tissues from LAD simplex (**Fig. 3**) and three tissues from AA simplex (**Supplemental Fig. 10**). On the basis of the expression levels of tissue-specific marker proteins detected by CAM, the relative proportions of constituent tissues are estimated using standardized averaging that are then used to deconvolute the mixed expressions into tissue-specific profiles by non-negative least-square regression techniques<sup>22</sup>. Upregulated marker proteins associated with specific tissues can be detected by One-Versus-Everyone (OVO) fold change thresholding, e.g., currently set to 2 for FP tissue.

### **GO Term and Pathway Enrichment Analysis**

GO Term and pathway enrichment analyses using GO Term Finder<sup>26</sup>, and IPA (Ingenuity Pathway Analysis, Ingenuity Systems, Redwood City, CA) tools were used to characterize the evaluable proteins obtained from the arterial samples. For the GO term enrichment analysis, clustering based on semantic similarity was used to indicate which child nodes could be represented by higher level parent nodes<sup>27</sup>. For the pathway analysis, the significant differentially expressed proteins with  $|\text{fold change}| \geq 1.7$  and the false discovery rate (FDR)

corrected p-value of 0.05 were analyzed with IPA for pathways, upstream regulators, and associated diseases and biological functions. The fold change cut-point of  $\geq 1.7$  was chosen to yield approximately 100 proteins for further analysis. The following parameters were used for these analyses: 1) Human genes in the Ingenuity Knowledge Base were used as the reference set; 2) Both the direct and indirect relationships were considered; 3) The confidence level was set to be “Experimentally Observed” and “High predicted” with high confidence scores; 4) The following selected tissues/cell types were used: heart, smooth muscle, fibroblasts, cardiomyocytes, endothelial cells, smooth muscle cells, and macrophages. The p-values for the identified canonical pathways, disease associations and functions were calculated using Fisher's exact test. The Benjamini-Hochberg method was used to estimate the false discovery rate, and an FDR-corrected p-value of 0.05 was used to select significantly enriched pathways. The significant upstream regulators were selected using p-value  $\leq 0.05$  and  $|Z\text{-score}| \geq 2$ . Similar analyses were also performed using proteins selected purely on the basis of q-value  $\leq 0.01$  for FP vs NL. (**Supplemental Tables 15 and 19** for data extracts of the IPA analyses.)

### **Differential Dependent Network Analyses**

Modeling biological networks is an important tool in systems biology to study the orchestrated activities of gene products in cells<sup>28</sup>. Significant rewiring of these networks provides a unique perspective on phenotypic transitions that can occur in biological systems<sup>29</sup>. Thus, instead of asking “which genes are differentially expressed”, a more interesting question is “which genes are differentially connected?”<sup>28,30</sup>. To systematically characterize selectively activated or deactivated regulatory components and mechanisms, the modeling tools must effectively distinguish significant rewiring from random background fluctuations. We have developed an integrated molecular network learning method, within a well-grounded mathematical framework, to construct differential dependency networks with significant rewiring<sup>23,31</sup>. This knowledge-fused differential dependency networks (kDDN) method, implemented as a Java Cytoscape app, can be used to optimally integrate prior biological knowledge with measured data to simultaneously construct both common and differential networks<sup>32,33</sup>.



kDDN algorithm jointly learns the shared biological network and statistically significant rewiring across different phenotypes. Phenotype-specific data and prior knowledge are quantitatively fused via an extended Lasso model with  $l_1$  regularized convex optimization formulation<sup>32</sup>.

Based on the unique nature of the problem, we derive an efficient closed-form solution for the embedded sub-problem solved by the block-wise coordinate descent (BCD) algorithm. Since existing knowledge is often nonspecific or imperfect, kDDN uses a “minimax” strategy to maximize the benefit of prior knowledge while confining its negative impact under the worst-case scenario. Furthermore, kDDN matches the values of model parameters to the expected false positive rates on network edges at a specified significance level, and assesses edge-specific p-values on each of the differential connections<sup>32</sup>.

We use kDDN to construct the network and detect significant network rewiring between FP and NL groups, where an extended Lasso-based sparse Gaussian graphic model is used to capture the network structure. The network rewiring under different phenotypes is inferred jointly by performing the BCD algorithms sequentially for all nodes. We then used permutation-based significance test to estimate p-values of the detected differential dependence edges<sup>31, 32</sup>.

Those detected differential dependence edges with p-values larger than 0.05 were filtered out for control of false positive rate. We used different colors to distinguish differential dependency edges under each phenotype, and use solid/dashed lines to indicate positive/negative dependences between nodes. The linewidths of edges correspond to the dependency strength to give a straightforward illustration and a better comparison within the network.

### **Multiple Reaction Monitoring Assay Design**

The 38 proteins identified by DDA-MS analysis to be most highly associated with fibrous plaques were selected as candidate circulating biomarker proteins. A peptide assay library was assembled for these proteins using the DDA-MS search results and the open-source Skyline MS-data analysis software<sup>34</sup> (**Supplemental Figure 13**). To streamline peptide selection for MRM-assay design, the top 6 fragment mass-to-charge values from library peptides identified from these 38 candidate proteins were extracted against an existing Data Independent

Acquisition file derived from normal, control human plasma. The top three to four performing peptides from each protein identified by this initial screen were included for downstream MRM-method building. Five proteins (DRB1, LCP1, RNASE1, MTHFD1, and CALU) were excluded at this step for absence of any detectable peptides in the reference plasma sample. Unscheduled MRM methods were developed for peptides from the remaining 33 proteins and pools of the processed CAD and Control plasma (described below) were injected and acquired against these methods for data refinement. A final scheduled, multiplexed MRM method against 323 fragments from 86 peptides of 33 putative FP marker proteins was optimized using the Skyline software, and included the addition of stable isotope labeled 'heavy' reference peptides (SIS peptides) in a subset of 7 proteins (C1R, APOE, APOB, VTNC, CO5, IGHM, ITIH1).

### **Scheduled MRM-MS Data Acquisition**

The multiplexed method, described above, was acquired on a SCIEX QTRAP6500 using multiple reaction monitoring (MRM) scanning in positive mode (Framingham, MA). Ion spray voltage was set to 5500 and source temperature set to 500 °C. Curtain gas was set at 35 to reduce contamination and Source Gases 1 and 2 were set to 60 and 70, respectively. 9 ug of digested samples was placed onto a Waters XBridge Peptide BEH C18 130Å, 3.5 µm, 2.1mm x 100mm column (Waters, Milford, Massachusetts). Mobile phase A was 0.1% formic acid, 2% acetonitrile, and 98% water, while mobile phase B was 0.1% formic acid, 5% water, and 95% acetonitrile. The sample was eluted over a 20-minute gradient moving from 1% to 35% mobile phase B. Retention times for MRM scheduling were gathered by first running subsets of the selected transitions to determine retention time. Afterwards, all transitions were combined into a single scheduled method using the previously determined retention times.

### **MRM Data Processing**

Raw files were analyzed in the Skyline software and peaks were manually investigated for quality, with care taken to ensure that retention times were well aligned across replicates, all monitored fragments co-eluted, and peptide peak areas could be easily discerned from

chemical noise and were free from interference. Manual filtering eliminated an additional eight proteins from further analysis due to low or undetectable signal-to-noise ratios (CATB, TSP1, NNMT, S100A9, ITIH2, POSTN, CORO1A, and HTRA). The final 25 candidate proteins were processed to generate protein-level abundance data from endogenous peptides as follows: (1) raw signals for both the heavy SIS and endogenous targets were analyzed across each of the 10 pooled replicates; (2) Normalization of each analyte in a given specimen to the median signal from the SIS-peptides in that specimen was performed to address signal drift across the acquisition block; (3) the coefficient of variation for endogenous peptide fragments across the 10 pool samples was calculated, and fragments were filtered to include only those with <20% CV (after normalization) were used for downstream analysis, with the exception of fragments from BCAM, BGH3, and CATZ which had no fragments <20% (but all fragments were still less than 40%) so all fragments from these proteins were still included; (4) the correlation matrices for all quantified peptides / fragments of a given protein were manually inspected and fragments / peptides with low correlation to the rest of the observations for a given protein were excluded; (5) the final normalized, filtered fragment-level intensities were averaged to yield protein level abundance for each specimen. For the seven proteins with corresponding SIS-peptides, the ratio of endogenous-to-heavy signal area was calculated per specimen and the same %CV filtering and correlation analysis from pooled replicates was performed on this ratio data, with all fragments meeting the filter criteria for inclusion. For a given protein, all ratio observations were averaged to yield protein level ratio abundances. As a validation index for the endogenous-quantitation workflow, the correlation between the SIS-based and endogenous quantitative pipeline was analyzed for the seven proteins with available SIS-peptides.

### **Validation of Candidate Plasma Fibrous Plaque Biomarkers**

Initially, an adaptive elastic net model ( $\alpha=0.9$ )<sup>35-37</sup> optimized by leave-one-out validation was used to select among the 25 candidate biomarkers for prediction of case status. Bias-corrected bootstrap sampling (n=10,000) was used to evaluate overall performance of the optimized

model based on median (95% CI) AUC from the bootstrap samples<sup>38</sup>. Qualitatively similar models were obtained when the elastic net model was optimized using K-fold (K=5) cross-validation or by minimizing AICc (data not shown).

# Proteomic Architecture of Human Coronary and Aortic Atherosclerosis

## Online Supplemental Figures

### Table of Contents

|                        |                                                                                                                              |
|------------------------|------------------------------------------------------------------------------------------------------------------------------|
| Supplemental Figure 1  | Arterial Sample Acquisition                                                                                                  |
| Supplemental Figure 2  | Data Missingness, Imputation, Batch Effects and Anatomic Overlap                                                             |
| Supplemental Figure 3  | Enriched GO: Biological Process Terms From Human LAD and AA Proteins                                                         |
| Supplemental Figure 4  | Enriched GO: Molecular Function Terms From Human LAD and AA Proteins                                                         |
| Supplemental Figure 5  | Enriched GO: Cellular Component Terms From Human LAD and AA Proteins                                                         |
| Supplemental Figure 6  | Weighted Co-Expression Network Analysis of Human Abdominal Aortic (AA) Proteins                                              |
| Supplemental Figure 7  | Number of Identifiable Proteins from Human LAD and AA Arterial Samples                                                       |
| Supplemental Figure 8  | Comparison of Extra Cellular Matrix Proteins in Normal LAD and AA Samples                                                    |
| Supplemental Figure 9  | Elastic Net Modelling of Proteins Predicting Presence or Absence of Fibrous Plaque in LAD (N=99) Samples                     |
| Supplemental Figure 10 | Convex Analysis of Mixtures (CAM) of AA Protein Data                                                                         |
| Supplemental Figure 11 | Convex Analysis of Mixtures (CAM) Identified Upregulated Fibrous Plaque Marker Proteins for LAD (n=99) and AA (n=99) Samples |
| Supplemental Figure 12 | Comparison of Extracellular Matrix Proteins in FP vs NL Samples in LAD and AA Samples                                        |
| Supplemental Figure 13 | Design and Quality Control Analysis of Tissue-Derived Circulating Fibrous Plaque Marker Panel                                |

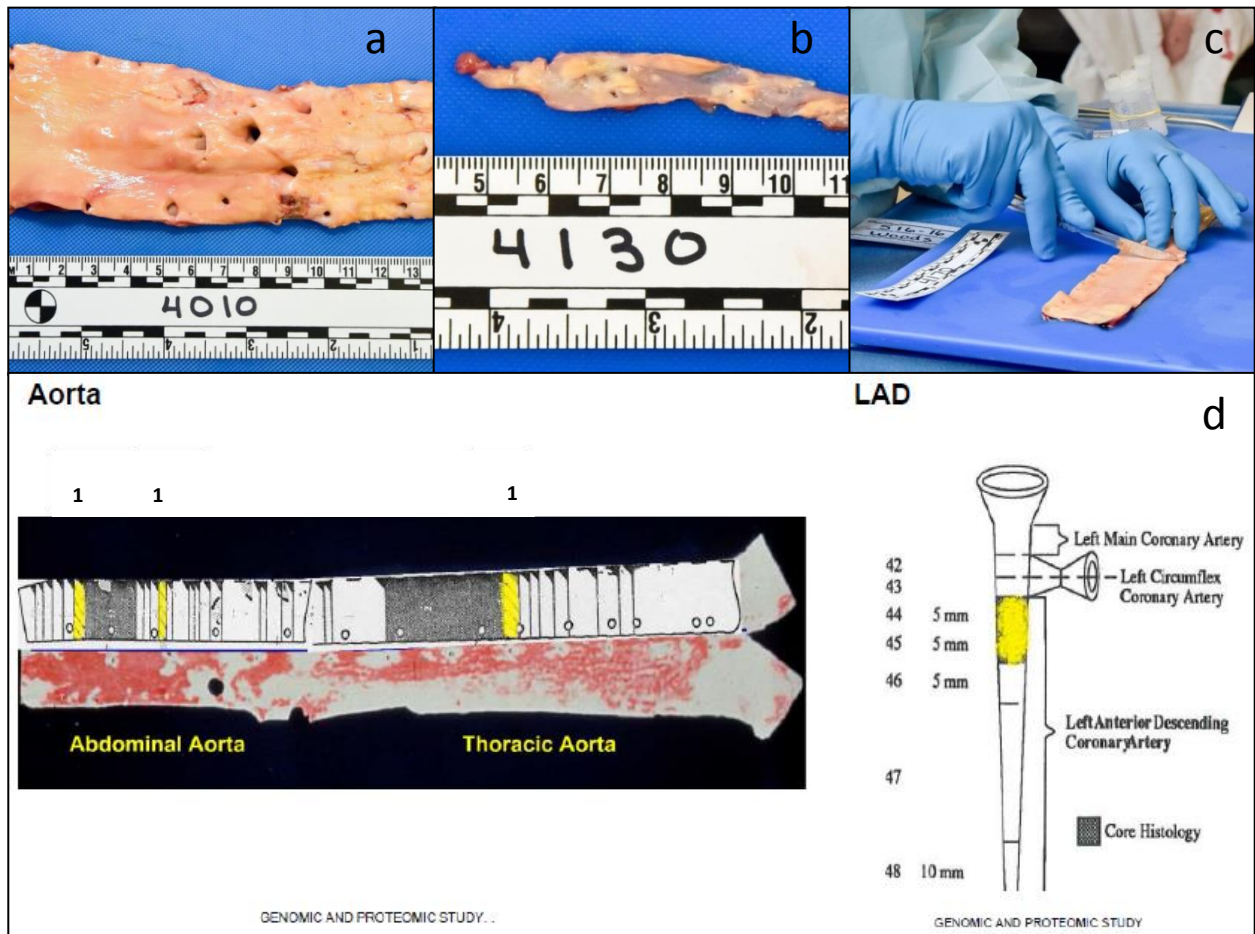

**Supplemental Figure 1. Arterial Sample Acquisition:** a.) distal aorta; b.) left anterior descending (LAD) coronary artery; c.) collection of a gram of tissue from the distal aortic specimen; d.) standardized locations for sample collection. Specimens were obtained from Sections 1, 16, 18, 44 and 45 (indicated in yellow) for all autopsies. These locations correspond to locations originally established and used for the Pathobiological Determinants of Atherosclerosis in Youth study<sup>1</sup>.

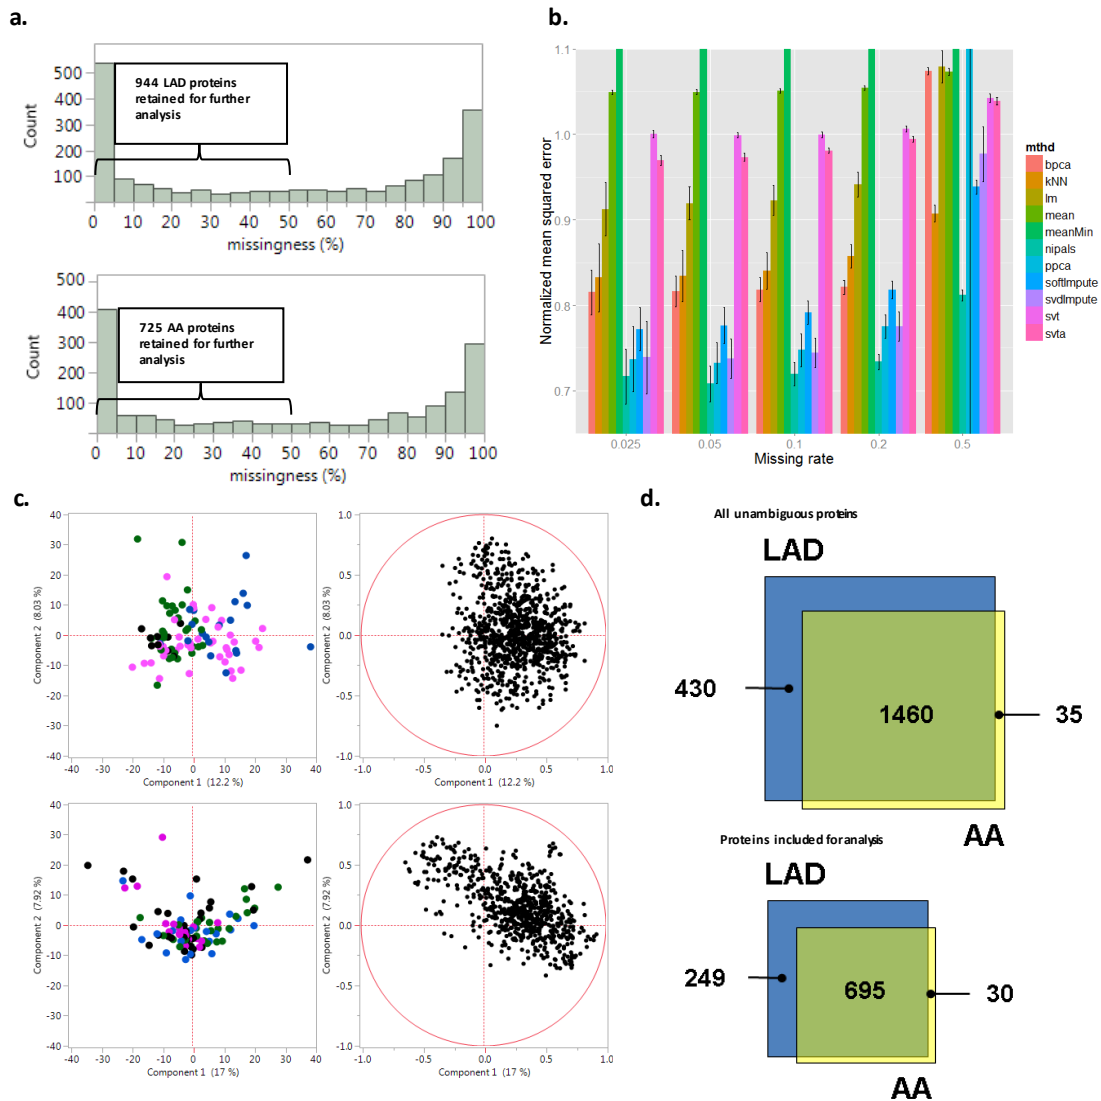

**Supplemental Figure 2. Data Missingness, Imputation, Batch Effects and Anatomic Overlap.** a.) Distribution of missingness for the LAD and AA data. The most common value for missingness was 0% in both the LAD and AA. However, there was a range of missingness including some unambiguously identified protein groups that were only present in a minority of samples. Missingness encoded models did not identify any proteins with >50% missingness that were significantly associated with disease status. b.) Using proteins with complete data (0% missingness) data sets simulating various rates (2.5%-50.0%), and types (random, inversely proportional with mean signal intensity) of missingness were used to test 11 different matrix completion methods. Based on the low normalized mean squared error, the NPIALS method was selected for imputation. c.) PCA analysis with color encoding for different protein extraction batches did not identify important batch effects or extreme outliers. d.) Proportional Venn diagrams indicating the overlap in identified and analyzed proteins in the LAD and AA territories.

**Supplemental Figure 3.** Enriched GO: Biological Process Terms from Human LAD and AA Proteins GO enrichment analysis was performed using 944 LAD proteins (left half of the plot – blue) and 725 AA proteins (right half of the plot – purple) that were included for subsequent analysis. GO terms with Bonferroni adjusted p-value <0.05 in either anatomic territory are presented.

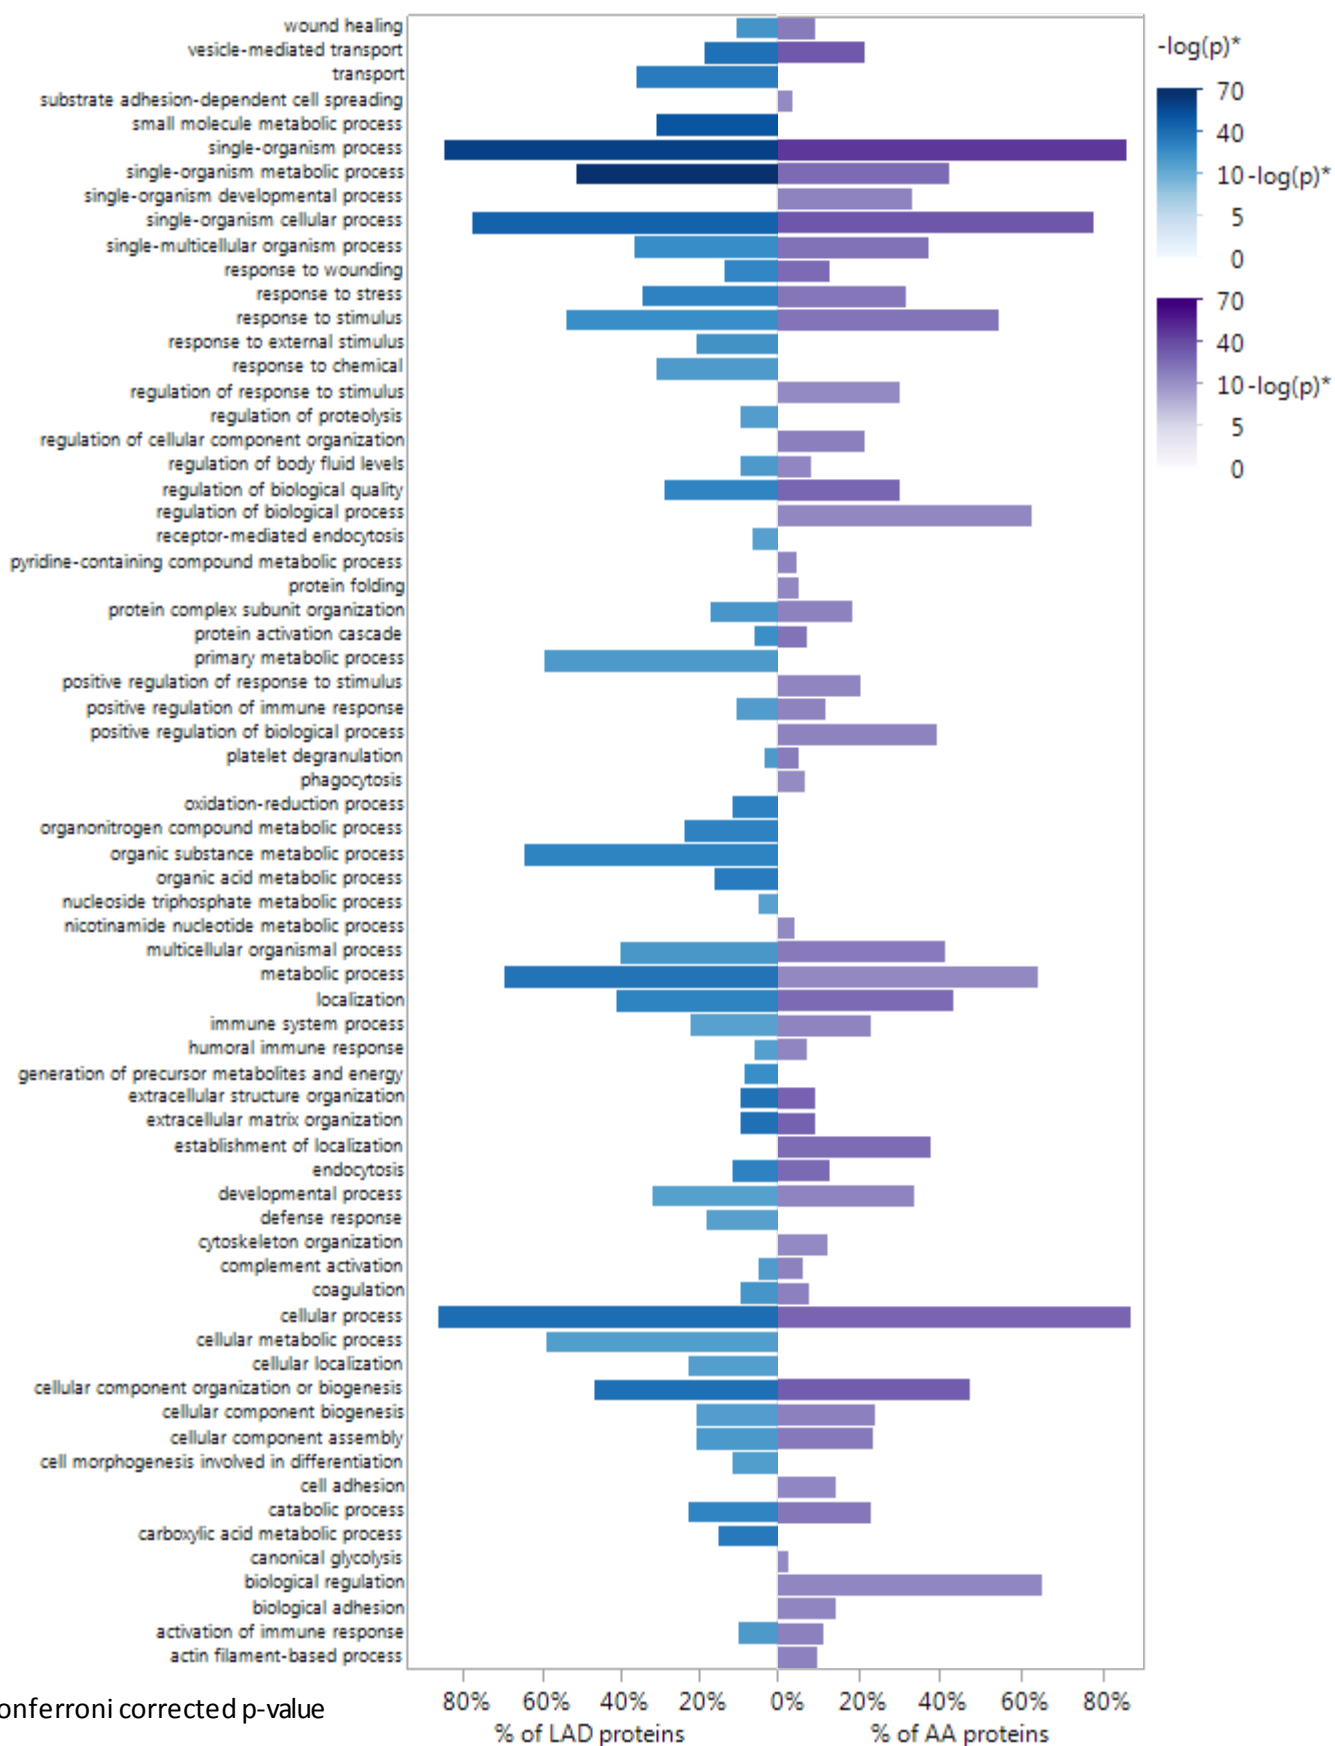

\* Bonferroni corrected p-value



**Supplemental Figure 4. Enriched GO: Molecular Function Terms from Human LAD and AA Proteins** GO term enrichment analysis was performed using 944 LAD proteins (left half of the plot – blue) and 725 AA proteins (right half of the plot – purple) that were included for subsequent analysis. GO terms with Bonferroni adjusted p-value <0.05 in either anatomic territory are presented.

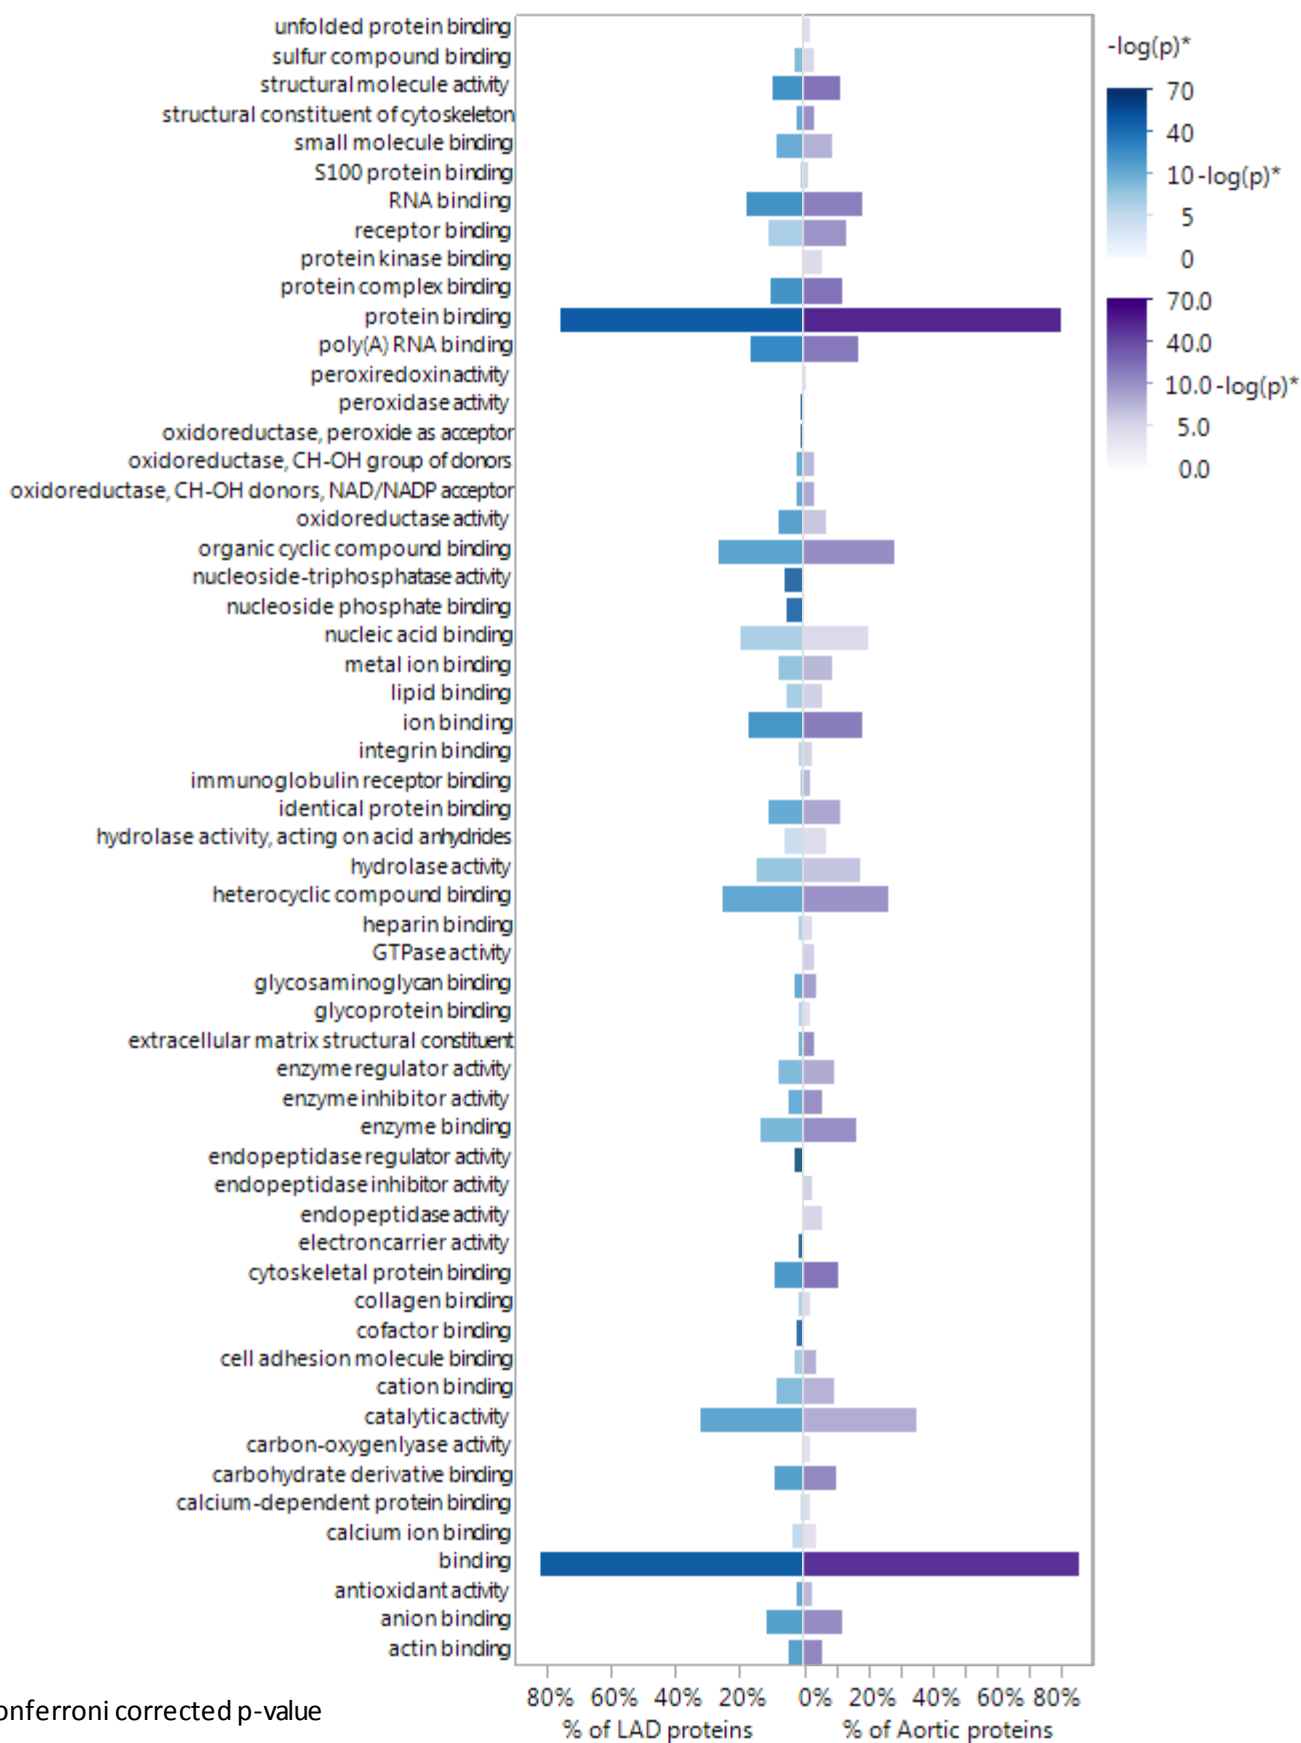

\* Bonferroni corrected p-value

**Supplemental Figure 5. Enriched GO: Cellular Component Terms from Human LAD and AA Proteins** GO term enrichment analysis was performed using 944 LAD proteins (left half of the plot – blue) and 725 AA proteins (right half of the plot – purple) that were included for subsequent analysis. GO terms with Bonferroni adjusted p-value <0.05 in either anatomic territory are presented.

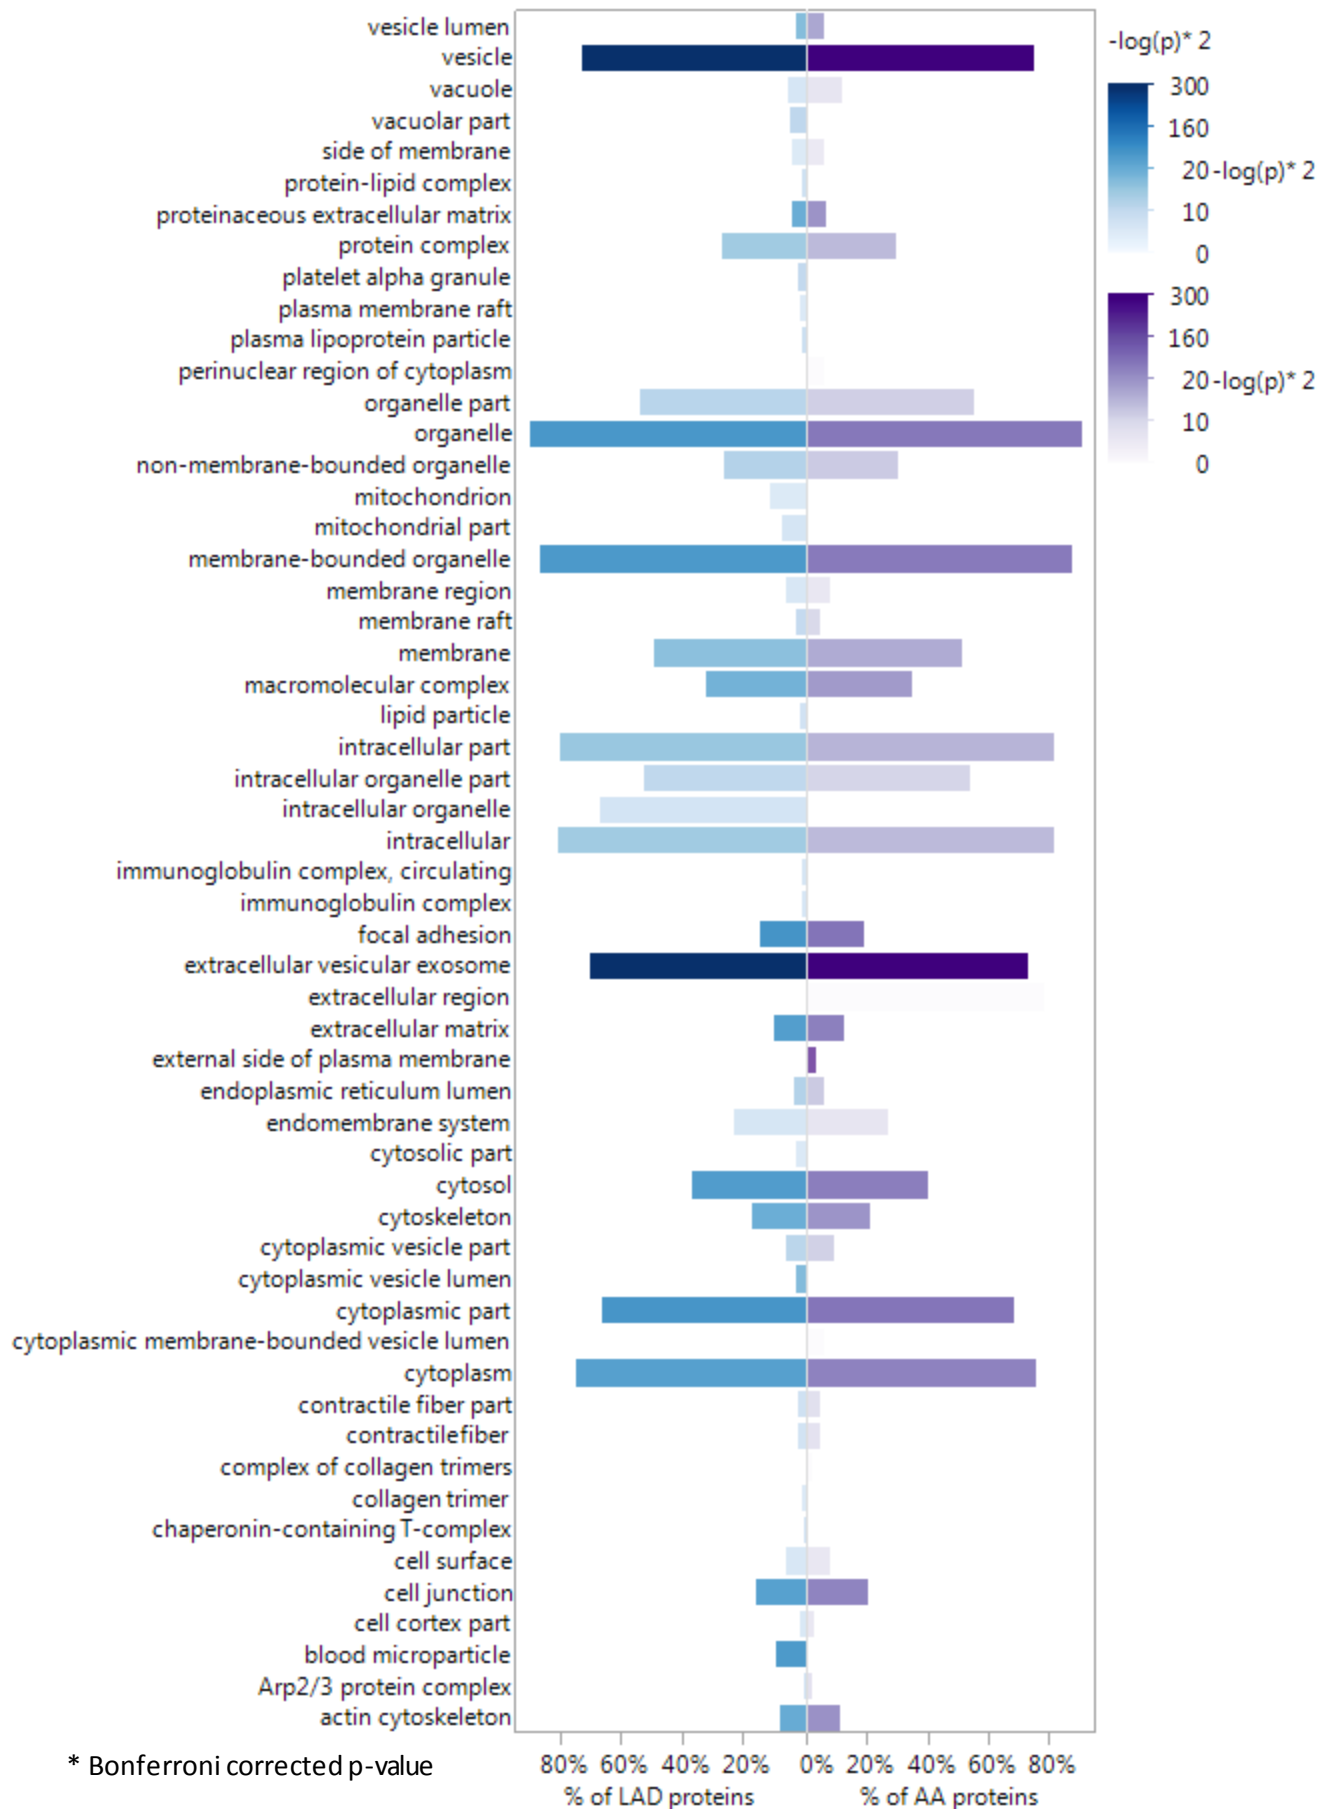

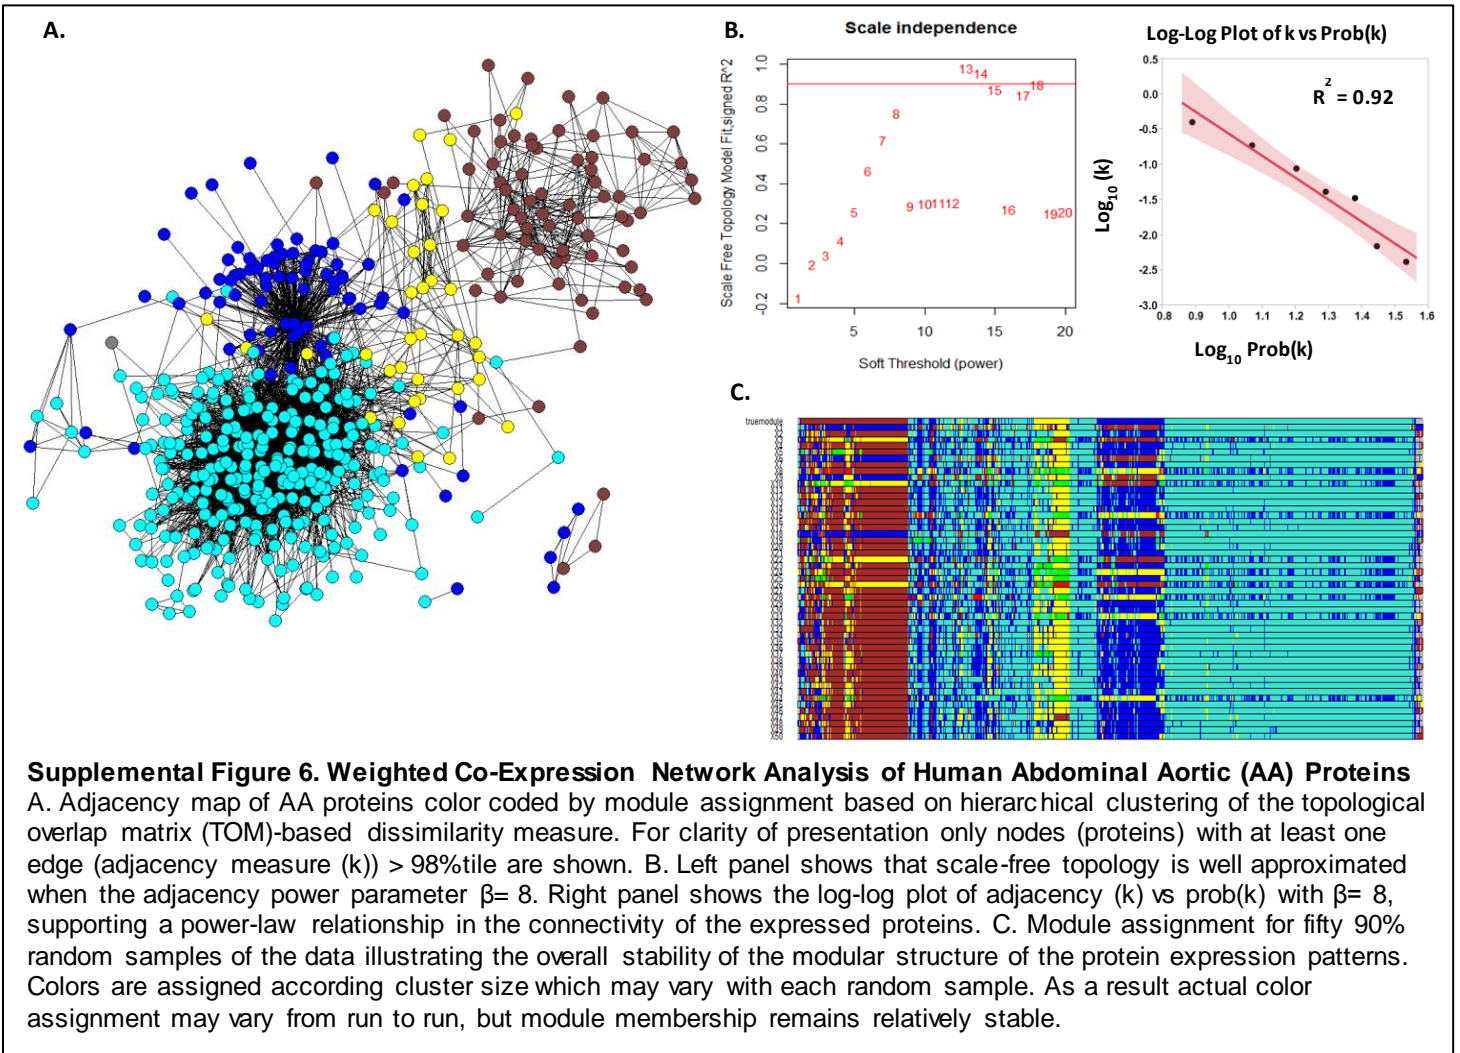

**Supplemental Figure 7. Number of Identifiable Proteins From Human LAD and AA Arterial Samples.** a. All samples (n=99 samples from each territory). Left Venn diagram: proteins detected at least once in any sample according to anatomic territory; Right Venn diagram: proteins detected in >50% of the samples. GO term analysis of the LAD only proteins indicated significant enrichment of mitochondrial proteins (p-values: unambiguous proteins = 1.8e-28; proteins with <50% missingness = 1.7e-6) b. Normal samples only (n=30 from each territory). Left Venn diagram: proteins detected at least once in any sample according to anatomic territory; Right Venn diagram: proteins detected in >50% of the samples. GO term analysis of the LAD only proteins indicated significant enrichment of mitochondrial proteins (p-values: unambiguous proteins = 1.0e-13; proteins with <50% missingness p-value = 1.9e-12)

**a. All Samples (LAD: n=99; AA: n=99)**

**Unambiguous proteins**

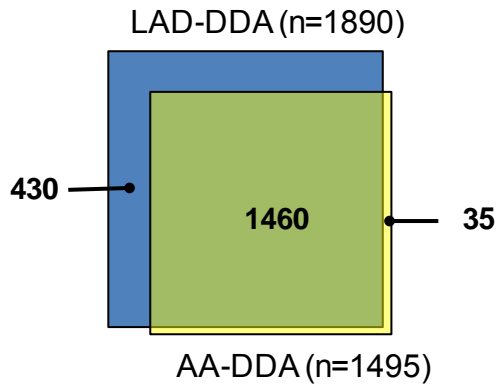

**Proteins with <50% missingness**

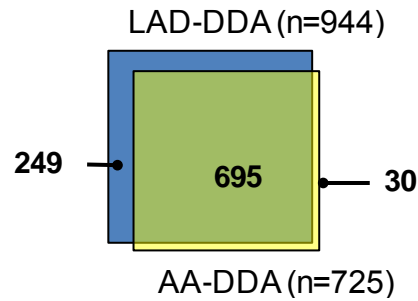

**b. Normal Samples only (LAD: n=30; AA: n=30)**

**Unambiguous proteins**

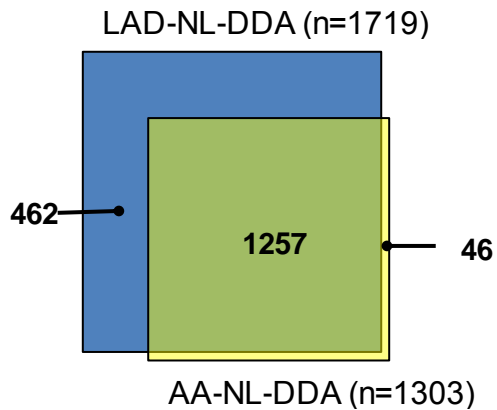

**Proteins with <50% missingness**

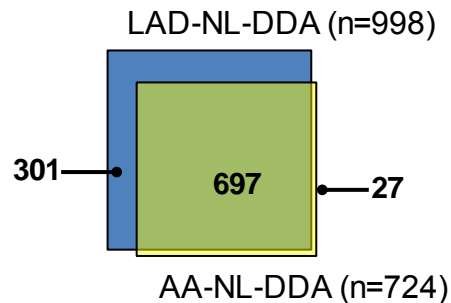

**Supplemental Figure 8. Comparison of Extra Cellular Matrix Proteins in Normal LAD and AA Samples.** Data independent MS (SWATH) analysis of completely normal LAD and AA samples (n=15 from each anatomic location) with adjustment for age, sex, MYH11, RABA7A, TERA, G6PI. Mean fold-difference = 6% (AA>LAD), p= 0.01.

**LAD vs AA Signed Fold-Difference (LAD/AA): Soluble ECM Proteins**

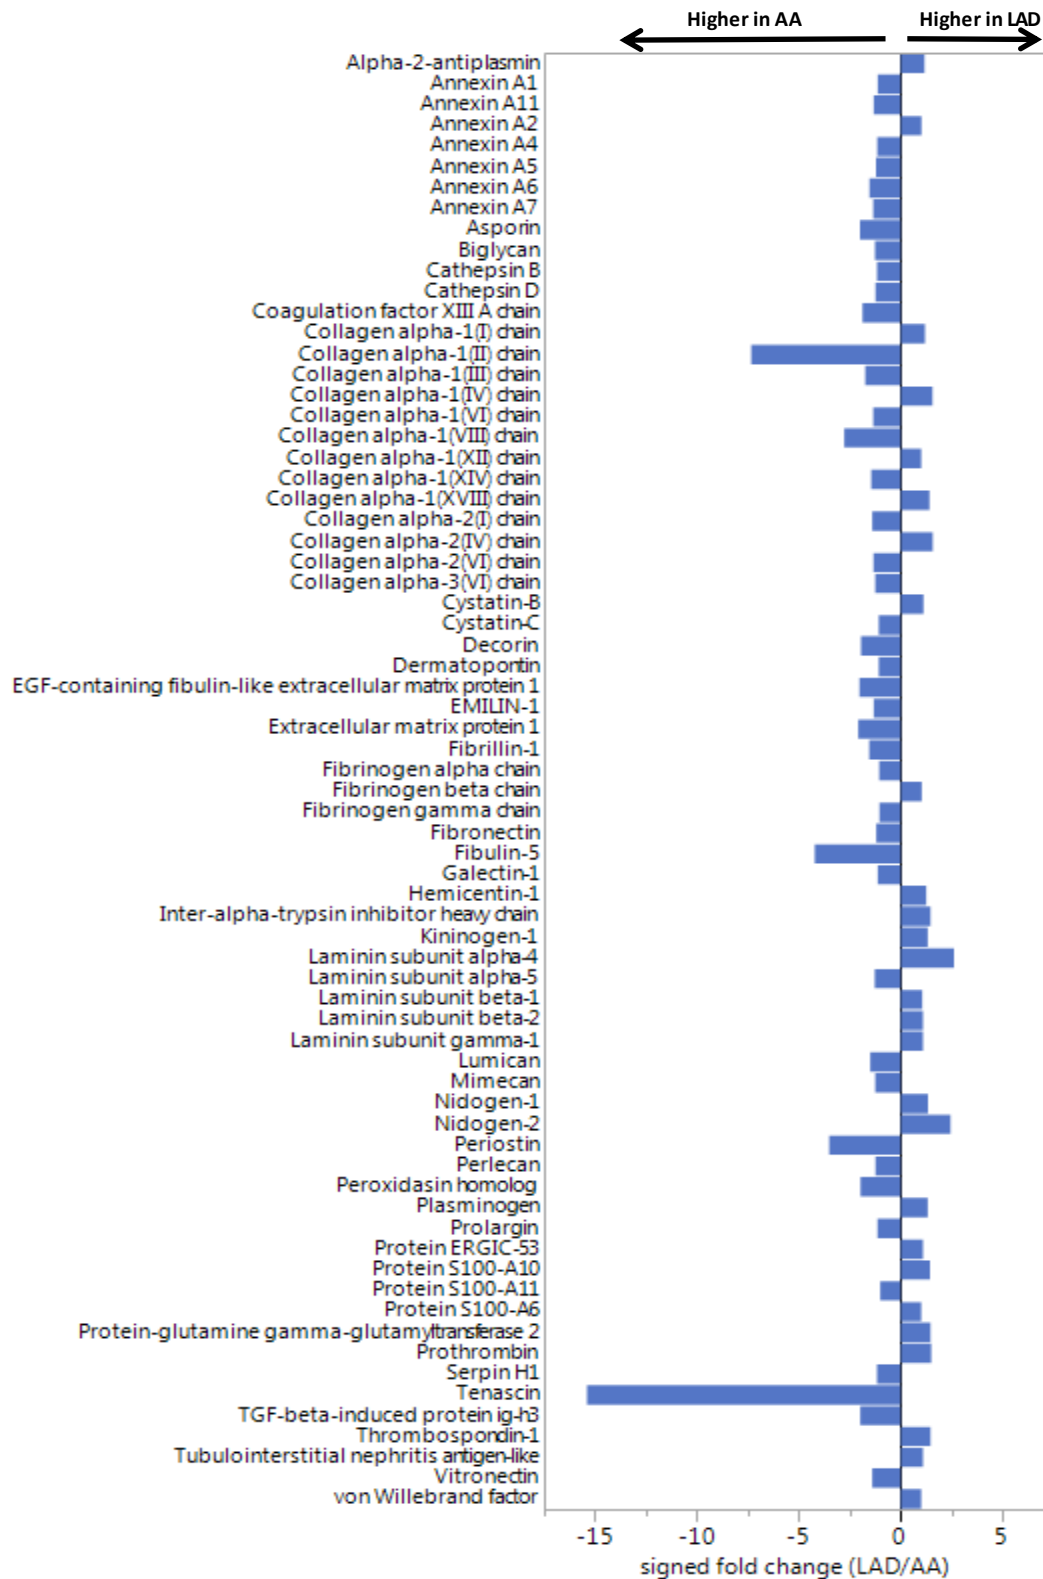

**Supplemental Figure 9. Elastic Net Modelling of Proteins Predicting Presence or Absence of Fibrous Plaque in LAD (N=99) Samples.** Graphs: Misclassification (left graph) and AUC (right graph) across a range of lambdas for two typical elastic net models predicting presence of fibrous plaque. Red points indicate the mean and bars indicate the SE for the estimate of misclassification or AUC across 10-folds in a cross-fold validation scheme. Numbers across the top indicate the number of variables (proteins) remaining in the model as the model progresses from the most inclusive (left) to the most parsimonious (right). **Table:** Models were developed using cross-fold validation to select the lambdas optimizing AUC or misclassification. To minimize the effect of chance in selecting folds for the cross-fold validation each model was run 100 times and the selected proteins and their respective beta coefficients were recorded. The table indicates the number of times each protein was selected in each of 100 models and the mean beta

for the subset of models where the protein in question was included. Proteins included in 10 or more models are indicated by bold in the # of models columns. Several highly correlated proteins competed for entry into these models.

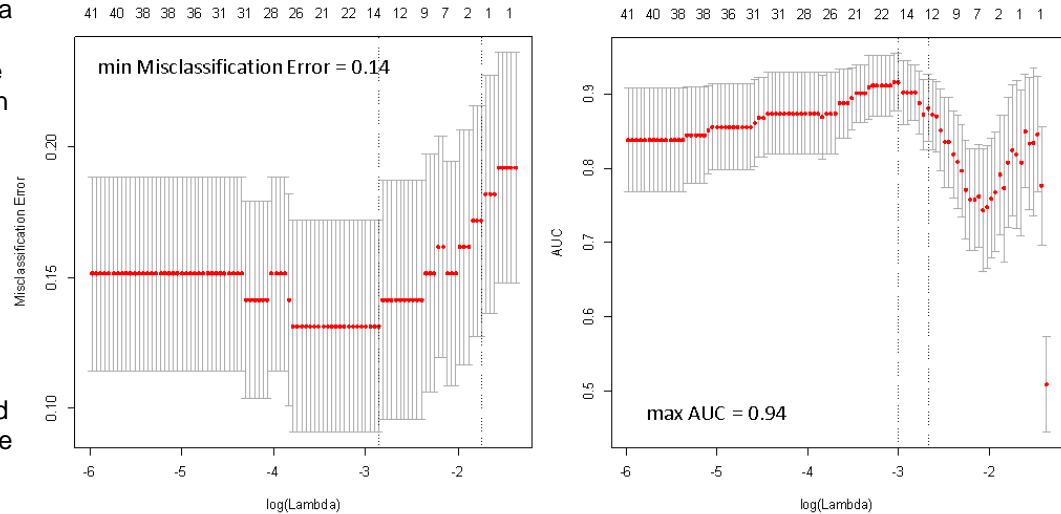

| Uniprot ID | Protein                                                                  | Gene    | Maximizing AUC |           | Minimizing Misclassification |           |
|------------|--------------------------------------------------------------------------|---------|----------------|-----------|------------------------------|-----------|
|            |                                                                          |         | # of models    | mean beta | # of models                  | mean beta |
| P24821     | Tenascin                                                                 | TNC     | <b>98</b>      | 0.2186    | <b>99</b>                    | 0.4057    |
| Q43852     | Calumenin                                                                | CALU    | <b>39</b>      | 1.2896    | <b>76</b>                    | 0.3454    |
| Q8NBX0     | Saccharopine dehydrogenase-like oxidoreductase                           | SCCPDH  | <b>39</b>      | 0.9419    | <b>46</b>                    | 0.5198    |
| Q43866     | CD5 antigen-like                                                         | CD5L    | <b>39</b>      | 0.8716    | <b>69</b>                    | 0.2865    |
| O14773     | Tripeptidyl-peptidase 1                                                  | TPP1    | <b>39</b>      | 0.7078    | <b>76</b>                    | 0.1898    |
| Q15063     | Periostin                                                                | POSTN   | <b>39</b>      | 0.5949    | <b>93</b>                    | 0.1174    |
| P07602     | Prosaposin                                                               | PSAP    | <b>39</b>      | 0.4851    | <b>48</b>                    | 0.2585    |
| P13760     | HLA class II histocompatibility antigen, DRB1-4 beta chain               | DRB1    | <b>39</b>      | 0.4804    | <b>99</b>                    | 0.1096    |
| Q9UBR2     | Cathepsin Z                                                              | CTSZ    | <b>39</b>      | 0.2781    | <b>85</b>                    | 0.1031    |
| Q6NZI2     | Polymerase I and transcript release factor                               | PTRF    | <b>39</b>      | 0.9566    | <b>46</b>                    | 0.5423    |
| P07998     | Ribonuclease pancreatic                                                  | RNA SE1 | <b>38</b>      | 0.0979    | <b>23</b>                    | 0.1233    |
| P09543     | 2',3'-cyclic-nucleotide 3'-phosphodiesterase                             | CNP     | <b>38</b>      | 0.2526    | <b>26</b>                    | 0.2877    |
| Q03135     | Caveolin-1                                                               | CAV1    | <b>38</b>      | 0.2749    | <b>45</b>                    | 0.1503    |
| P07858     | Cathepsin B                                                              | CTSB    | <b>32</b>      | 0.0764    | <b>95</b>                    | 0.0270    |
| P04114     | Apolipoprotein B-100                                                     | APOB    | <b>21</b>      | 0.3371    | <b>11</b>                    | 0.5460    |
| Q16853     | Membrane primary amine oxidase                                           | AOC3    | <b>19</b>      | 0.0698    | <b>10</b>                    | 0.0813    |
| P40261     | Nicotinamide N-methyltransferase                                         | NNMT    | <b>17</b>      | 0.4705    | <b>8</b>                     | 0.9733    |
| Q13200     | 26S proteasome non-ATPase regulatory subunit 2                           | PSMD2   | <b>15</b>      | 0.6538    | <b>6</b>                     | 1.8703    |
| P11586     | C-1-tetrahydrofolate synthase, cytoplasmic                               | MTHFD1  | <b>13</b>      | 0.1454    | <b>3</b>                     | 1.2007    |
| P50395     | Rab GDP dissociation inhibitor beta                                      | GDI2    | <b>8</b>       | 0.6810    | <b>3</b>                     | 2.5022    |
| P63241     | Eukaryotic translation initiation factor 5A-1                            | EIF5A   | <b>8</b>       | 0.7468    | <b>3</b>                     | 3.2132    |
| P08237     | ATP-dependent 6-phosphofructokinase, muscle type                         | PFKM    | <b>7</b>       | 0.5024    | <b>3</b>                     | 1.7951    |
| Q06828     | Fibromodulin                                                             | FMOD    | <b>7</b>       | 2.3252    | <b>3</b>                     | 7.3673    |
| P09960     | Leukotriene A-4 hydrolase                                                | LTA4H   | <b>6</b>       | 0.9809    | <b>3</b>                     | 2.6087    |
| P04844     | Dolichyl-diphosphooligosaccharide--protein glycosyltransferase subunit 2 | RPN2    | <b>2</b>       | 3.3432    | <b>1</b>                     | 14.323    |
| P34932     | Heat shock 70 kDa protein 4                                              | HSPA4   | <b>2</b>       | 5.1045    | <b>1</b>                     | 20.526    |
| P49908     | Selenoprotein P                                                          | SEPP1   | <b>2</b>       | 5.0315    | <b>1</b>                     | 17.382    |
| P52209     | 6-phosphogluconate dehydrogenase, decarboxylating                        | PGD     | <b>2</b>       | 3.5218    | <b>1</b>                     | 10.090    |
| P84157     | Matrix-remodeling-associated protein 7                                   | MXRA7   | <b>2</b>       | 4.9994    | <b>1</b>                     | 19.504    |
| O95834     | Echinoderm microtubule-associated protein-like 2                         | EML2    | <b>1</b>       | 2.4512    | <b>1</b>                     | 3.3472    |
| P14174     | Macrophage migration inhibitory factor                                   | MIF     | <b>1</b>       | 2.0485    | <b>1</b>                     | 3.4632    |
| P21926     | CD9 antigen                                                              | CD9     | <b>1</b>       | 0.8408    | <b>1</b>                     | 1.0123    |
| P28482     | Mitogen-activated protein kinase 1                                       | MAPK1   | <b>1</b>       | 3.6737    | <b>1</b>                     | 4.5044    |
| P43652     | Afamin                                                                   | AFM     | <b>1</b>       | 2.9634    | <b>1</b>                     | 3.4717    |

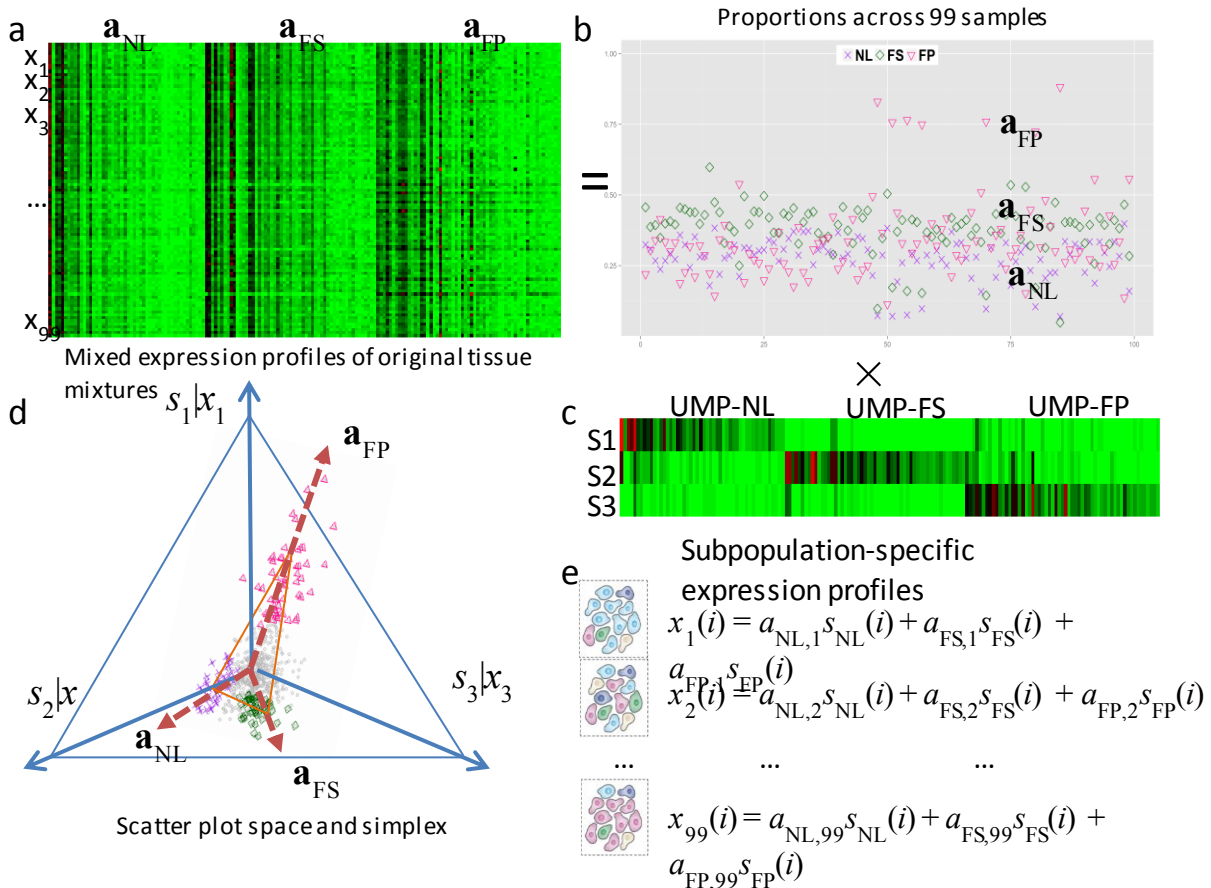

**Supplemental Figure 10 Convex Analysis of Mixtures of AA Protein Data.** a. Heatmap of mixed expressions of upregulated marker proteins (UMP) in 99 AA samples. b. Estimated proportions of NL, FS, and FP across 99 AA samples. Note: The AA data only supported identification of three vertices compared with four vertices in the LAD data. c. Heatmap of subpopulation-specific expressions of upregulated marker proteins. d. Geometry of the mixing operation in scatter space that produces a compressed and rotated scatter simplex whose vertices host subpopulation-specific upregulated marker proteins and correspond to mixing proportions. e. Mathematical description on the protein expression readout of multiple distinct subpopulations.

**Supplemental Figure 11. Convex Analysis of Mixtures (CAM) Identified Upregulated Fibrous Plaque Marker Proteins for LAD (n=99) and AA (n=99) Samples.**

**LAD CAM Fibrous Plaque Marker Proteins**

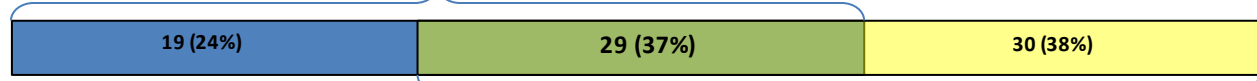

**AA CAM Fibrous Plaque Marker Proteins**

| LAD Only  |                                                 |          | LAD and AA    |                                                     |                  | AA Only   |                                                   |           |
|-----------|-------------------------------------------------|----------|---------------|-----------------------------------------------------|------------------|-----------|---------------------------------------------------|-----------|
| UniprotID | Protein                                         | Gene     | UniprotID     | Protein                                             | Gene             | UniprotID | Protein                                           | Gene      |
| Q8IUX7    | Adipocyte enhancer-binding protein 1            | AEBP1    | <b>P04114</b> | <b>Apolipoprotein B-100</b>                         | <b>APOB</b>      | P01023    | Alpha-2-macroglobulin                             | A2M       |
| P01024    | Complement C3                                   | C3       | <b>P02649</b> | <b>Apolipoprotein E</b>                             | <b>APOE</b>      | P02765    | Alpha-2-HS-glycoprotein                           | AHSG      |
| P07358    | Complement component C8 beta chain              | C8B      | <b>Q14791</b> | <b>Apolipoprotein L1</b>                            | <b>APOL1</b>     | P05090    | Apolipoprotein D                                  | APOD      |
| P07360    | Complement component C8 gamma chain             | C8G      | <b>P00736</b> | <b>Complement C1r subcomponent</b>                  | <b>C1R</b>       | P0C0L5    | Complement C4-B                                   | C4B       |
| Q99715    | Collagen alpha-1(XII) chain                     | COL12A1  | <b>P04003</b> | <b>C4b-binding protein alpha chain</b>              | <b>C4BPA</b>     | P00751    | Complement factor B                               | CFB       |
| Q9UBR2    | Cathepsin Z                                     | CTSZ     | <b>P01031</b> | <b>Complement C5</b>                                | <b>C5</b>        | Q9BXR6    | Complement factor H-related protein 5             | CFHR5     |
| P02751    | Fibronectin                                     | FN1      | <b>P10643</b> | <b>Complement component C7</b>                      | <b>C7</b>        | P00450    | Ceruloplasmin                                     | CP        |
| P13760    | HLA class II HC Ag, DRB1-4 beta chain           | HLA-DRB1 | <b>P40121</b> | <b>Macrophage-capping protein</b>                   | <b>CAPG</b>      | P59665    | Neutrophil defensin 1                             | DEFA1     |
| Q92743    | Serine protease HTRA1                           | HTRA1    | <b>Q43866</b> | <b>CD5 antigen-like</b>                             | <b>CD5L</b>      | P00488    | Coagulation factor XIII A chain                   | F13A1     |
| P35858    | IGF-binding protein complex acid labile subunit | IGFALS   | <b>P08603</b> | <b>Complement factor H</b>                          | <b>CFH</b>       | P00734    | Prothrombin                                       | F2        |
| P05783    | Keratin, type I cytoskeletal 18                 | KRT18    | <b>P05156</b> | <b>Complement factor I</b>                          | <b>CFI</b>       | P02671    | Fibrinogen alpha chain                            | FGA       |
| P08519    | Apolipoprotein(a)                               | LPA      | <b>P31146</b> | <b>Coronin-1A</b>                                   | <b>CORO1A</b>    | P02794    | Ferritin heavy chain                              | FTH1      |
| P01620    | Ig kappa chain V-III region SIE                 | none     | <b>P07858</b> | <b>Cathepsin B</b>                                  | <b>CTSB</b>      | P02792    | Ferritin light chain                              | FTL       |
| Q15063    | Periostin                                       | POSTN    | <b>P07339</b> | <b>Cathepsin D</b>                                  | <b>CTSD</b>      | P69905    | Hemoglobin subunit alpha                          | HBA1      |
| P34096    | Ribonuclease 4                                  | RNASE4   | <b>P02675</b> | <b>Fibrinogen beta chain</b>                        | <b>FGB</b>       | P69891    | Hemoglobin subunit gamma-1                        | HBG1      |
| P06702    | Protein S100-A9                                 | S100A9   | <b>P02679</b> | <b>Fibrinogen gamma chain</b>                       | <b>FGG</b>       | P01892    | HLA class I HC Ag, A-2 alpha chain                | HLA-A     |
| Q15582    | TGFB-induced protein ig-h3                      | TGFB1    | <b>P01871</b> | <b>Ig mu chain C region</b>                         | <b>IGHM</b>      | P00738    | Haptoglobin                                       | HP        |
| P07996    | Thrombospondin-1                                | THBS1    | <b>P19827</b> | <b>Inter-alpha-trypsin inhibitor heavy chain H1</b> | <b>ITIH1</b>     | P00739    | Haptoglobin-related protein                       | HPR       |
| P04004    | Vitronectin                                     | VTN      | <b>P19823</b> | <b>Inter-alpha-trypsin inhibitor heavy chain H2</b> | <b>ITIH2</b>     | P04196    | Histidine-rich glycoprotein                       | HRG       |
|           |                                                 |          | <b>P18428</b> | <b>Lipopolysaccharide-binding protein</b>           | <b>LBP</b>       | P01877    | Ig alpha-2 chain C region                         | IGHA2     |
|           |                                                 |          | <b>P13796</b> | <b>Plastin-2</b>                                    | <b>LCPL</b>      | P06312    | Ig kappa chain V-IV region (Fragment)             | IGKV4-1   |
|           |                                                 |          | <b>P61626</b> | <b>Lysozyme C</b>                                   | <b>LYZ</b>       | Q14624    | Inter-alpha-trypsin inhibitor heavy chain H4      | ITIH4     |
|           |                                                 |          | <b>P40261</b> | <b>Nicotinamide N-methyltransferase</b>             | <b>NNMT</b>      | P01042    | Kininogen-1                                       | KNG1      |
|           |                                                 |          | <b>Q96P05</b> | <b>N-acetylmuramoyl-L-alanine amidase</b>           | <b>PGLYRP2</b>   | P20700    | Lamin-B1                                          | LMNB1     |
|           |                                                 |          | <b>P27169</b> | <b>Serum paraoxonase/arylesterase 1</b>             | <b>PON1</b>      | P01594    | Ig kappa chain V-I region AU                      | none      |
|           |                                                 |          | <b>P05546</b> | <b>Heparin cofactor 2</b>                           | <b>SERPIN D1</b> | P52209    | 6-phosphogluconate dehydrogenase, decarboxylating | PGD       |
|           |                                                 |          | <b>P02730</b> | <b>Band 3 anion transport protein</b>               | <b>SLC4A1</b>    | P00747    | Plasminogen                                       | PLG       |
|           |                                                 |          | <b>P35442</b> | <b>Thrombospondin-2</b>                             | <b>THBS2</b>     | P20742    | Pregnancy zone protein                            | PZP       |
|           |                                                 |          | <b>P24821</b> | <b>Tenascin</b>                                     | <b>TNC</b>       | P05155    | Plasma protease C1 inhibitor                      | SERPIN G1 |
|           |                                                 |          |               |                                                     |                  | P04179    | Superoxide dismutase [Mn], mitochondrial          | SOD2      |



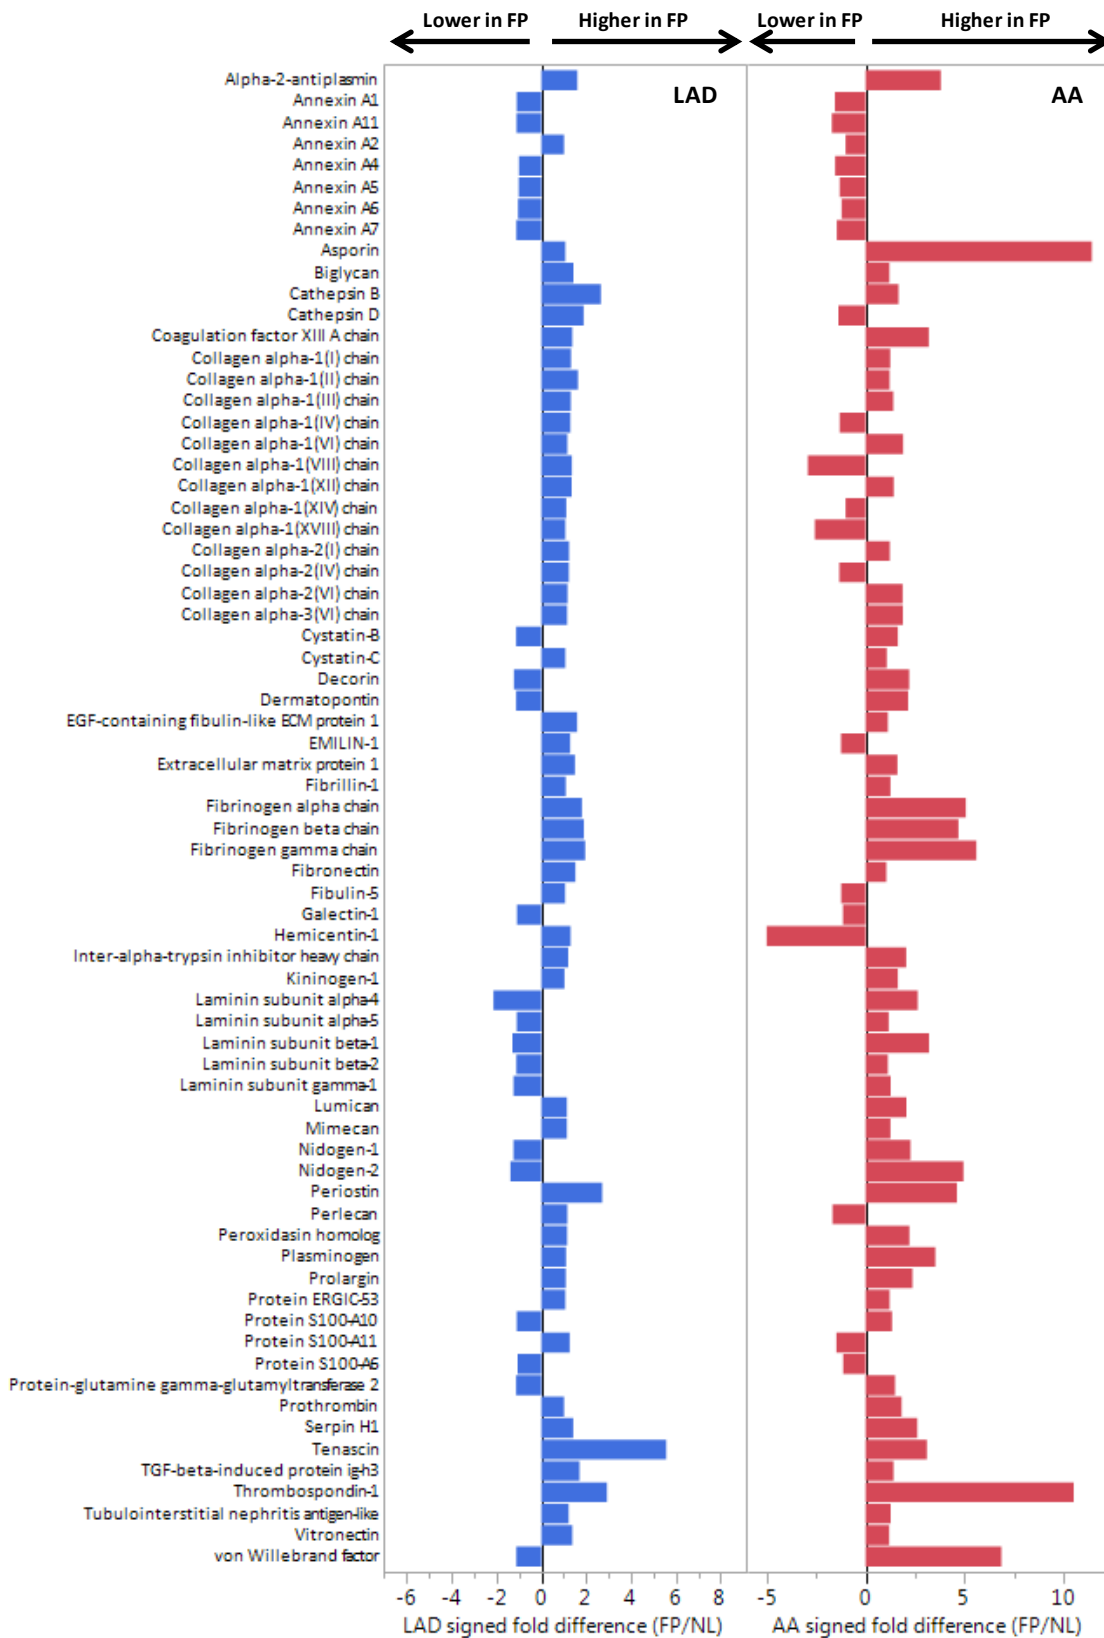

**Supplemental Figure 12. Comparison of Extracellular Matrix Proteins in FP vs NL Samples in LAD and AA Samples** Data independent acquisition (SWATH) analysis was used to compare a targeted set of extracellular matrix proteins in LAD (FP n=15; NL n=30) and AA (FP n=9; NL n=18) samples after adjustment for age, sex, MYH11, RABA7A, TERA, G6PI. Histogram bars indicate relative difference between FP and NL samples in each anatomic location. LAD Mean FP/NL = 1.25, MANOVA p-value = 0.02; AA Mean FP/NL = 1.78, p-value = 0.017

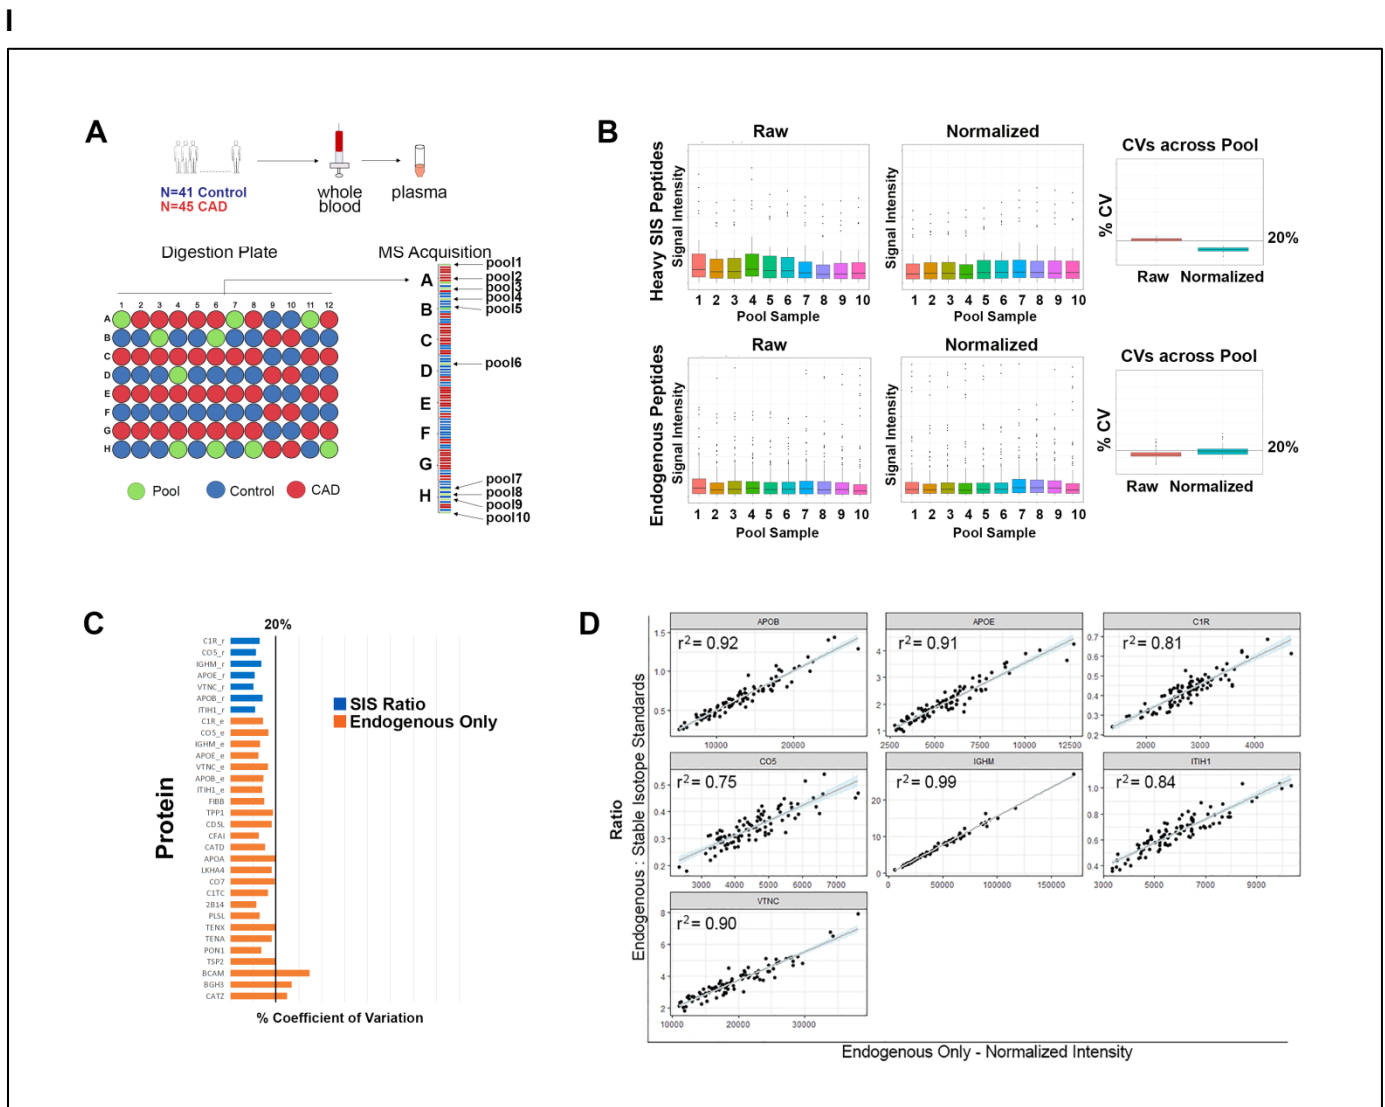

**Supplemental Figure 13. Design and Quality Control Analysis of Tissue-Derived Circulating Fibrous Plaque Marker Panel.** (A) Plasma samples were processed from whole blood samples of female donors with established coronary artery disease (CAD, N=45) or apparently healthy controls (Control, N=41). An additional sample of normal control pooled plasma (Pool, N=10) was used in technical replicates to monitor workflow precision. Samples were randomized and acquired against an optimized multiplexed scheduled MRM assay to quantify the relative abundance of 33 candidate FP markers in human plasma. (B) Data quality monitoring of signal intensity for each fragment monitored across the 10 pool plasma technical replicates indicated a slight downward drift in signal intensity for both spiked stable isotope standard (SIS) peptides (upper left boxplot) and endogenous peptides (lower left boxplot) from the beginning to the end of acquisition, this drift was mitigated by normalizing all raw signals by the median intensity of all SIS peptides from a given injection (middle boxplots). This normalization maintained an appropriately low coefficient of variation (%CV) across pooled replicates (right most boxplots). (C) Final data processing strategy resulted in a final panel of 25 quantifiable plasma proteins as fibrous plaque biomarker candidates. As expected, proteins quantified by SIS ratios (dark blue bars) had slightly lower %CV than when the same proteins were quantified by the endogenous peptide workflow (orange bars), although nearly all proteins demonstrated excellent % CV in the pooled replicates. (D) As additional validation of the endogenous quantification workflow, overall correlations between SIS-quantified and endogenously-quantified proteins were very strong.

# Proteomic Architecture of Human Coronary and Aortic Atherosclerosis

## Online Supplemental Tables

### Table of Contents

|                       |                                                                                                                                                                                                   |
|-----------------------|---------------------------------------------------------------------------------------------------------------------------------------------------------------------------------------------------|
| Supplemental Table 1  | Human Arterial Proteins from Left Anterior Descending (LAD) Coronary Artery (N=99) and Distal Abdominal Aortic (AA) (N=99) Samples                                                                |
| Supplemental Table 2  | Human LAD Protein GO Terms: Biologic Processes (top 100 GO Terms)                                                                                                                                 |
| Supplemental Table 3  | Human LAD Protein GO Terms: Molecular Functions (adj. p-value < 0.05*)                                                                                                                            |
| Supplemental Table 4  | Human LAD Protein GO Terms: Cellular Component (adj. p-value < 0.05*)                                                                                                                             |
| Supplemental Table 5  | Human Distal Aortic Protein GO Terms: Biologic Process (top 100 GO Terms)                                                                                                                         |
| Supplemental Table 6  | Human Distal Aortic Protein GO Terms: Molecular Function (adj. p-value < 0.05*)                                                                                                                   |
| Supplemental Table 7  | Human Distal Aortic Protein GO Terms: Cellular Component (adj. p-value < 0.05*)                                                                                                                   |
| Supplemental Table 8  | Enriched Ingenuity Canonical Pathways among 944 Human LAD Proteins (FDR<0.001)                                                                                                                    |
| Supplemental Table 9  | Enriched Ingenuity Canonical Pathways among 725 Human Distal Aortic Proteins (FDR<0.001)                                                                                                          |
| Supplemental Table 10 | Regression Models of Association between Individual Proteins and Extent of Surface Area Involved with Fibrous Plaque (FP) or Normal Intima (NML) in Human LAD Arterial Samples (top 100 proteins) |
| Supplemental Table 11 | Regression Models of Association between Individual Proteins and Extent of Surface Area Involved with Fibrous Plaque (FP) or Normal (NML) in Human Abdominal Aorta Samples (top 100 proteins)     |
| Supplemental Table 12 | Up-Regulated Proteins in LAD Fibrous Plaque Samples (n=15) Compared with Normal LAD Samples (n=30)                                                                                                |
| Supplemental Table 13 | Down-Regulated Proteins in LAD Fibrous Plaque Samples (n=15) Compared with Normal LAD Samples (n=30)                                                                                              |

|                       |                                                                                                                       |
|-----------------------|-----------------------------------------------------------------------------------------------------------------------|
| Supplemental Table 14 | Predicted Upstream Master Regulators for Up- and Down-Regulated Fibrous Plaque Proteins                               |
| Supplemental Table 15 | IPA Output for Analysis of Fibrous Plaque vs NL Marker Proteins with q-value $\leq 0.05$ and  fold change  $\geq 1.7$ |
| Supplemental Table 16 | Up-Regulated Proteins in Fibrous Plaque Enriched AA Samples (n=7) Compared with Normal AA Samples (n=15)              |
| Supplemental Table 17 | Down-Regulated Proteins in Fibrous Plaque Enriched AA Samples (n=7) Compared with Normal AA Samples (n=15)            |
| Supplemental Table 17 | Overlap of Patho-Proteomic Fibrous Plaque Proteins in Human LAD (n=99) and AA (n=99) Samples                          |
| Supplemental Table 19 | IPA Output for Analysis of Fibrous Plaque vs NL Marker Proteins with q-value $\leq 0.01$                              |

**Supplemental Table 1. Human Arterial Proteins from Left Anterior Descending (LAD) Coronary Artery (N=99) and Distal Abdominal Aortic (AA) (N=99) Samples**

<see separate excel spreadsheet>

**Supplemental Table 2 Human LAD Protein GO Terms: Biologic Processes (top 100 GO Terms)**

| <u>GO Term ID</u> | <u>Description</u>                             | <u># of proteins</u> | <u>log(p-value)*</u> |
|-------------------|------------------------------------------------|----------------------|----------------------|
| GO:0044710        | single-organism metabolic process              | 490                  | -69.46               |
| GO:0044699        | single-organism process                        | 807                  | -62.11               |
| GO:0044281        | small molecule metabolic process               | 293                  | -53.18               |
| GO:0044763        | single-organism cellular process               | 737                  | -47.07               |
| GO:0009987        | cellular process                               | 821                  | -41.91               |
| GO:0071840        | cellular component organization or biogenesis  | 445                  | -40.94               |
| GO:0016192        | vesicle-mediated transport                     | 181                  | -40.34               |
| GO:0030198        | extracellular matrix organization              | 91                   | -40.29               |
| GO:0043062        | extracellular structure organization           | 91                   | -40.16               |
| GO:0008152        | metabolic process                              | 661                  | -38.93               |
| GO:0019752        | carboxylic acid metabolic process              | 146                  | -36.47               |
| GO:0006082        | organic acid metabolic process                 | 156                  | -35.83               |
| GO:0006810        | transport                                      | 341                  | -35.55               |
| GO:0055114        | oxidation-reduction process                    | 110                  | -33.01               |
| GO:0006950        | response to stress                             | 329                  | -32.61               |
| GO:1901564        | organonitrogen compound metabolic process      | 227                  | -32.56               |
| GO:0006897        | endocytosis                                    | 111                  | -32.55               |
| GO:0071704        | organic substance metabolic process            | 615                  | -32.36               |
| GO:0051179        | localization                                   | 390                  | -32.34               |
| GO:0065008        | regulation of biological quality               | 274                  | -31.59               |
| GO:0009056        | catabolic process                              | 218                  | -31.57               |
| GO:0009611        | response to wounding                           | 130                  | -30.88               |
| GO:0044707        | single-multicellular organism process          | 349                  | -27.85               |
| GO:0006091        | generation of precursor metabolites and energy | 85                   | -27.46               |
| GO:0050896        | response to stimulus                           | 513                  | -27.35               |
| GO:0072376        | protein activation cascade                     | 61                   | -26.78               |
| GO:0009605        | response to external stimulus                  | 201                  | -24.80               |
| GO:0042060        | wound healing                                  | 101                  | -24.20               |
| GO:0050817        | coagulation                                    | 92                   | -23.59               |
| GO:0071822        | protein complex subunit organization           | 167                  | -22.67               |
| GO:0032501        | multicellular organismal process               | 383                  | -22.47               |
| GO:0022607        | cellular component assembly                    | 199                  | -21.77               |
| GO:0002576        | platelet degranulation                         | 36                   | -21.35               |
| GO:0002253        | activation of immune response                  | 99                   | -21.31               |
| GO:0044238        | primary metabolic process                      | 565                  | -21.23               |
| GO:0050878        | regulation of body fluid levels                | 95                   | -21.10               |
| GO:0042221        | response to chemical                           | 295                  | -20.70               |
| GO:0006956        | complement activation                          | 51                   | -20.35               |
| GO:0050778        | positive regulation of immune response         | 104                  | -19.57               |
| GO:0000904        | cell morphogenesis involved in differentiation | 111                  | -19.30               |
| GO:0044237        | cellular metabolic process                     | 562                  | -19.28               |
| GO:0044085        | cellular component biogenesis                  | 201                  | -19.08               |
| GO:0030162        | regulation of proteolysis                      | 91                   | -19.07               |
| GO:0051641        | cellular localization                          | 218                  | -18.51               |
| GO:0006959        | humoral immune response                        | 61                   | -18.28               |
| GO:0032502        | developmental process                          | 305                  | -17.68               |
| GO:0006952        | defense response                               | 174                  | -17.37               |
| GO:0006898        | receptor-mediated endocytosis                  | 65                   | -17.33               |
| GO:0009141        | nucleoside triphosphate metabolic process      | 49                   | -17.01               |
| GO:0002376        | immune system process                          | 211                  | -16.81               |
| GO:0072524        | pyridine-containing compound metabolic process | 35                   | -16.63               |
| GO:0048584        | positive regulation of response to stimulus    | 181                  | -16.60               |

|            |                                                        |     |        |
|------------|--------------------------------------------------------|-----|--------|
| GO:0046496 | nicotinamide nucleotide metabolic process              | 34  | -16.58 |
| GO:0033036 | macromolecule localization                             | 185 | -16.54 |
| GO:0008104 | protein localization                                   | 165 | -16.03 |
| GO:0048518 | positive regulation of biological process              | 339 | -15.70 |
| GO:0061024 | membrane organization                                  | 116 | -15.42 |
| GO:0019538 | protein metabolic process                              | 350 | -15.32 |
| GO:0046907 | intracellular transport                                | 160 | -14.83 |
| GO:0048583 | regulation of response to stimulus                     | 265 | -14.71 |
| GO:0040011 | locomotion                                             | 145 | -14.58 |
| GO:0051128 | regulation of cellular component organization          | 163 | -14.39 |
| GO:0006928 | cellular component movement                            | 157 | -14.38 |
| GO:0005975 | carbohydrate metabolic process                         | 101 | -14.34 |
| GO:0006508 | proteolysis                                            | 128 | -14.21 |
| GO:0005996 | monosaccharide metabolic process                       | 48  | -14.20 |
| GO:0002252 | immune effector process                                | 93  | -14.14 |
| GO:0051186 | cofactor metabolic process                             | 54  | -14.02 |
| GO:0044711 | single-organism biosynthetic process                   | 148 | -14.01 |
| GO:0065007 | biological regulation                                  | 582 | -13.93 |
| GO:0031589 | cell-substrate adhesion                                | 46  | -13.71 |
| GO:0002682 | regulation of immune system process                    | 149 | -13.70 |
| GO:0080134 | regulation of response to stress                       | 135 | -13.56 |
| GO:0044282 | small molecule catabolic process                       | 53  | -13.12 |
| GO:0070887 | cellular response to chemical stimulus                 | 207 | -13.07 |
| GO:0030029 | actin filament-based process                           | 72  | -13.03 |
| GO:0050789 | regulation of biological process                       | 553 | -12.87 |
| GO:0045087 | innate immune response                                 | 128 | -12.85 |
| GO:0002673 | regulation of acute inflammatory response              | 23  | -12.80 |
| GO:0032879 | regulation of localization                             | 166 | -12.67 |
| GO:0051130 | positive regulation of cellular component organization | 101 | -12.60 |
| GO:0006793 | phosphorus metabolic process                           | 212 | -12.59 |
| GO:0043086 | negative regulation of catalytic activity              | 86  | -12.58 |
| GO:0006457 | protein folding                                        | 40  | -12.45 |
| GO:0009636 | response to toxic substance                            | 32  | -12.42 |
| GO:1901135 | carbohydrate derivative metabolic process              | 120 | -12.26 |
| GO:0061615 | glycolytic process through fructose-6-phosphate        | 17  | -12.10 |
| GO:0051246 | regulation of protein metabolic process                | 191 | -12.05 |
| GO:0019637 | organophosphate metabolic process                      | 99  | -11.94 |
| GO:0007010 | cytoskeleton organization                              | 96  | -11.92 |
| GO:0002526 | acute inflammatory response                            | 26  | -11.89 |
| GO:0034446 | substrate adhesion-dependent cell spreading            | 24  | -11.87 |
| GO:0006935 | chemotaxis                                             | 89  | -11.84 |
| GO:0048468 | cell development                                       | 136 | -11.83 |
| GO:0022610 | biological adhesion                                    | 109 | -11.72 |
| GO:0006955 | immune response                                        | 155 | -11.61 |
| GO:0001775 | cell activation                                        | 88  | -11.51 |
| GO:0072350 | tricarboxylic acid metabolic process                   | 18  | -11.43 |
| GO:1901657 | glycosyl compound metabolic process                    | 53  | -11.26 |
| GO:0052547 | regulation of peptidase activity                       | 52  | -11.17 |

\* Bonferroni corrected p-value

Supplemental Table 3. Human LAD Protein GO Terms: Molecular Functions (adj. p-value < 0.05\*)

| <u>GO Term ID</u> | <u>Description</u> | <u># of proteins</u> | <u>log(p-value)*</u> |
|-------------------|--------------------|----------------------|----------------------|
|-------------------|--------------------|----------------------|----------------------|

|            |                                                                                       |     |        |
|------------|---------------------------------------------------------------------------------------|-----|--------|
| GO:0005515 | protein binding                                                                       | 719 | -50.25 |
| GO:0005488 | binding                                                                               | 780 | -49.47 |
| GO:0044822 | poly(A) RNA binding                                                                   | 160 | -29.24 |
| GO:0005198 | structural molecule activity                                                          | 94  | -24.83 |
| GO:0003723 | RNA binding                                                                           | 169 | -24.82 |
| GO:0032403 | protein complex binding                                                               | 101 | -24.66 |
| GO:0043167 | ion binding                                                                           | 165 | -23.14 |
| GO:0008092 | cytoskeletal protein binding                                                          | 86  | -21.19 |
| GO:0043168 | anion binding                                                                         | 113 | -17.67 |
| GO:0097367 | carbohydrate derivative binding                                                       | 89  | -17.58 |
| GO:0003779 | actin binding                                                                         | 46  | -16.90 |
| GO:0016491 | oxidoreductase activity                                                               | 79  | -16.89 |
| GO:0097159 | organic cyclic compound binding                                                       | 253 | -15.65 |
| GO:0003824 | catalytic activity                                                                    | 310 | -14.77 |
| GO:0016209 | antioxidant activity                                                                  | 23  | -13.55 |
| GO:1901363 | heterocyclic compound binding                                                         | 241 | -13.24 |
| GO:0005539 | glycosaminoglycan binding                                                             | 32  | -12.80 |
| GO:0005200 | structural constituent of cytoskeleton                                                | 26  | -12.64 |
| GO:0016616 | oxidoreductase activity, acting on the CH-OH group of donors, NAD or NADP as acceptor | 26  | -12.47 |
| GO:0042802 | identical protein binding                                                             | 107 | -11.64 |
| GO:0036094 | small molecule binding                                                                | 81  | -11.00 |
| GO:0016614 | oxidoreductase activity, acting on CH-OH group of donors                              | 26  | -10.98 |
| GO:0004857 | enzyme inhibitor activity                                                             | 47  | -10.48 |
| GO:0005201 | extracellular matrix structural constituent                                           | 20  | -9.54  |
| GO:0061135 | endopeptidase regulator activity                                                      | 28  | -9.34  |
| GO:0019899 | enzyme binding                                                                        | 127 | -9.25  |
| GO:0030234 | enzyme regulator activity                                                             | 75  | -8.88  |
| GO:1901681 | sulfur compound binding                                                               | 29  | -8.80  |
| GO:0043169 | cation binding                                                                        | 82  | -8.74  |
| GO:0046872 | metal ion binding                                                                     | 75  | -7.98  |
| GO:0016787 | hydrolase activity                                                                    | 141 | -7.76  |
| GO:0034987 | immunoglobulin receptor binding                                                       | 13  | -7.27  |
| GO:0050839 | cell adhesion molecule binding                                                        | 29  | -7.08  |
| GO:0016684 | oxidoreductase activity, acting on peroxide as acceptor                               | 14  | -7.08  |
| GO:0008289 | lipid binding                                                                         | 53  | -6.88  |
| GO:0005102 | receptor binding                                                                      | 104 | -6.75  |
| GO:0003676 | nucleic acid binding                                                                  | 187 | -6.62  |
| GO:0008201 | heparin binding                                                                       | 20  | -6.30  |
| GO:0044548 | S100 protein binding                                                                  | 9   | -6.24  |
| GO:0005518 | collagen binding                                                                      | 16  | -6.24  |
| GO:0004601 | peroxidase activity                                                                   | 13  | -6.13  |
| GO:0001948 | glycoprotein binding                                                                  | 18  | -6.02  |
| GO:0009055 | electron carrier activity                                                             | 20  | -6.00  |
| GO:0005178 | integrin binding                                                                      | 19  | -5.58  |
| GO:0017111 | nucleoside-triphosphatase activity                                                    | 59  | -5.27  |
| GO:0005509 | calcium ion binding                                                                   | 34  | -5.26  |
| GO:0048306 | calcium-dependent protein binding                                                     | 14  | -5.15  |
| GO:1901265 | nucleoside phosphate binding                                                          | 53  | -4.84  |
| GO:0048037 | cofactor binding                                                                      | 23  | -4.69  |
| GO:0016817 | hydrolase activity, acting on acid anhydrides                                         | 60  | -4.59  |
| GO:0000166 | nucleotide binding                                                                    | 52  | -4.46  |
| GO:0070325 | lipoprotein particle receptor binding                                                 | 9   | -4.00  |
| GO:0051082 | unfolded protein binding                                                              | 15  | -4.00  |
| GO:0005496 | steroid binding                                                                       | 15  | -3.34  |
| GO:0019900 | kinase binding                                                                        | 46  | -3.28  |
| GO:0016853 | isomerase activity                                                                    | 20  | -3.20  |



|            |                                                                        |    |       |
|------------|------------------------------------------------------------------------|----|-------|
| GO:0046983 | protein dimerization activity                                          | 64 | -3.16 |
| GO:0001848 | complement binding                                                     | 7  | -2.98 |
| GO:0008307 | structural constituent of muscle                                       | 11 | -2.98 |
| GO:0017166 | vinculin binding                                                       | 6  | -2.82 |
| GO:0042803 | protein homodimerization activity                                      | 53 | -2.77 |
| GO:0046914 | transition metal ion binding                                           | 38 | -2.75 |
| GO:0003823 | antigen binding                                                        | 34 | -2.74 |
| GO:0043178 | alcohol binding                                                        | 14 | -2.67 |
| GO:0002020 | protease binding                                                       | 16 | -2.53 |
| GO:0016835 | carbon-oxygen lyase activity                                           | 11 | -2.52 |
| GO:0051087 | chaperone binding                                                      | 13 | -2.50 |
| GO:0031625 | ubiquitin protein ligase binding                                       | 29 | -2.49 |
| GO:0016860 | intramolecular oxidoreductase activity                                 | 10 | -2.43 |
| GO:0044389 | small conjugating protein ligase binding                               | 29 | -2.38 |
| GO:0019003 | GDP binding                                                            | 11 | -2.31 |
| GO:0023026 | MHC class II protein complex binding                                   | 7  | -2.28 |
| GO:0043394 | proteoglycan binding                                                   | 7  | -2.28 |
| GO:0055102 | lipase inhibitor activity                                              | 6  | -2.21 |
| GO:0016667 | oxidoreductase activity, acting on a sulfur group of donors            | 10 | -2.09 |
| GO:0016801 | hydrolase activity, acting on ether bonds                              | 5  | -2.06 |
| GO:0008233 | peptidase activity                                                     | 42 | -1.99 |
| GO:0004175 | endopeptidase activity                                                 | 30 | -1.98 |
| GO:0019001 | guanyl nucleotide binding                                              | 18 | -1.95 |
| GO:0004064 | arylesterase activity                                                  | 4  | -1.75 |
| GO:0004301 | epoxide hydrolase activity                                             | 4  | -1.75 |
| GO:0023023 | MHC protein complex binding                                            | 7  | -1.74 |
| GO:0019865 | immunoglobulin binding                                                 | 5  | -1.72 |
| GO:0016903 | oxidoreductase activity, acting on the aldehyde or oxo group of donors | 10 | -1.60 |
| GO:0015485 | cholesterol binding                                                    | 9  | -1.56 |
| GO:0032561 | guanyl ribonucleotide binding                                          | 17 | -1.44 |
| GO:0044325 | ion channel binding                                                    | 14 | -1.38 |
| GO:0060090 | binding, bridging                                                      | 19 | -1.33 |

\* Bonferroni corrected p-value

Supplemental Table 4. Human LAD Protein GO Terms: Cellular Component (adj. p-value &lt; 0.05\*)

| <u>GO Term ID</u> | <u>Description</u>                         | <u># of proteins</u> | <u>log(p-value)*</u> |
|-------------------|--------------------------------------------|----------------------|----------------------|
| GO:0031982        | vesicle                                    | 694                  | -300.00              |
| GO:0070062        | extracellular vesicular exosome            | 671                  | -300.00              |
| GO:0005925        | focal adhesion                             | 142                  | -84.66               |
| GO:0044444        | cytoplasmic part                           | 633                  | -81.64               |
| GO:0043226        | organelle                                  | 857                  | -77.12               |
| GO:0043227        | membrane-bounded organelle                 | 825                  | -73.16               |
| GO:0072562        | blood microparticle                        | 92                   | -71.56               |
| GO:0005829        | cytosol                                    | 352                  | -64.45               |
| GO:0031012        | extracellular matrix                       | 98                   | -60.94               |
| GO:0005737        | cytoplasm                                  | 712                  | -55.97               |
| GO:0030054        | cell junction                              | 154                  | -53.69               |
| GO:0015629        | actin cytoskeleton                         | 83                   | -26.96               |
| GO:0005578        | proteinaceous extracellular matrix         | 45                   | -22.33               |
| GO:0005856        | cytoskeleton                               | 165                  | -20.83               |
| GO:0032991        | macromolecular complex                     | 309                  | -19.25               |
| GO:0060205        | cytoplasmic membrane-bounded vesicle lumen | 31                   | -17.64               |
| GO:0031983        | vesicle lumen                              | 31                   | -17.44               |
| GO:0016020        | membrane                                   | 473                  | -16.77               |
| GO:0044424        | intracellular part                         | 763                  | -15.51               |
| GO:0043234        | protein complex                            | 259                  | -14.65               |
| GO:0005622        | intracellular                              | 768                  | -14.65               |
| GO:0005788        | endoplasmic reticulum lumen                | 38                   | -12.37               |
| GO:0043228        | non-membrane-bounded organelle             | 252                  | -12.26               |
| GO:0044422        | organelle part                             | 511                  | -11.60               |
| GO:0044433        | cytoplasmic vesicle part                   | 65                   | -11.38               |
| GO:0044437        | vacuolar part                              | 52                   | -10.91               |
| GO:0044446        | intracellular organelle part               | 500                  | -10.79               |
| GO:0031091        | platelet alpha granule                     | 22                   | -10.39               |
| GO:0045121        | membrane raft                              | 34                   | -10.18               |
| GO:0034358        | plasma lipoprotein particle                | 13                   | -8.87                |
| GO:0032994        | protein-lipid complex                      | 13                   | -8.21                |
| GO:0044449        | contractile fiber part                     | 27                   | -8.16                |
| GO:0005832        | chaperonin-containing T-complex            | 8                    | -7.80                |
| GO:0005885        | Arp2/3 protein complex                     | 8                    | -7.80                |
| GO:0005811        | lipid particle                             | 17                   | -7.67                |
| GO:0043292        | contractile fiber                          | 27                   | -7.38                |
| GO:0043229        | intracellular organelle                    | 639                  | -7.26                |
| GO:0042571        | immunoglobulin complex, circulating        | 12                   | -6.87                |
| GO:0044429        | mitochondrial part                         | 75                   | -6.87                |
| GO:0012505        | endomembrane system                        | 225                  | -6.71                |
| GO:0019814        | immunoglobulin complex                     | 12                   | -6.61                |
| GO:0005773        | vacuole                                    | 56                   | -6.55                |
| GO:0009986        | cell surface                               | 63                   | -6.12                |
| GO:0098589        | membrane region                            | 61                   | -6.12                |
| GO:0044448        | cell cortex part                           | 19                   | -6.09                |
| GO:0005581        | collagen trimer                            | 12                   | -5.69                |
| GO:0044445        | cytosolic part                             | 32                   | -5.65                |
| GO:0044853        | plasma membrane raft                       | 16                   | -5.53                |
| GO:0005739        | mitochondrion                              | 114                  | -5.44                |
| GO:0098552        | side of membrane                           | 46                   | -5.42                |
| GO:0005759        | mitochondrial matrix                       | 43                   | -5.13                |
| GO:0009897        | external side of plasma membrane           | 24                   | -5.11                |
| GO:0045259        | proton-transporting ATP synthase complex   | 10                   | -5.10                |
| GO:0048471        | perinuclear region of cytoplasm            | 43                   | -5.06                |
| GO:0005577        | fibrinogen complex                         | 7                    | -4.96                |

|            |                                               |     |       |
|------------|-----------------------------------------------|-----|-------|
| GO:0005783 | endoplasmic reticulum                         | 109 | -4.68 |
| GO:0005839 | proteasome core complex                       | 9   | -4.60 |
| GO:0001725 | stress fiber                                  | 12  | -4.60 |
| GO:0032432 | actin filament bundle                         | 12  | -4.44 |
| GO:0098644 | complex of collagen trimers                   | 9   | -4.10 |
| GO:0005623 | cell                                          | 818 | -4.08 |
| GO:0044464 | cell part                                     | 817 | -4.06 |
| GO:0000502 | proteasome complex                            | 15  | -3.90 |
| GO:0042641 | actomyosin                                    | 12  | -3.74 |
| GO:0005938 | cell cortex                                   | 21  | -3.74 |
| GO:0044432 | endoplasmic reticulum part                    | 76  | -3.63 |
| GO:0042383 | sarcolemma                                    | 12  | -3.26 |
| GO:0031090 | organelle membrane                            | 157 | -3.11 |
| GO:0005874 | microtubule                                   | 25  | -3.04 |
| GO:0071944 | cell periphery                                | 273 | -2.98 |
| GO:0005884 | actin filament                                | 12  | -2.63 |
| GO:0036019 | endolysosome                                  | 7   | -2.59 |
| GO:0030175 | filopodium                                    | 12  | -2.54 |
| GO:0031252 | cell leading edge                             | 26  | -2.49 |
| GO:0030529 | ribonucleoprotein complex                     | 54  | -2.42 |
| GO:0016469 | proton-transporting two-sector ATPase complex | 10  | -2.41 |
| GO:0044455 | mitochondrial membrane part                   | 22  | -2.27 |
| GO:0005886 | plasma membrane                               | 265 | -2.21 |
| GO:0001527 | microfibril                                   | 5   | -2.15 |
| GO:0042995 | cell projection                               | 71  | -1.98 |
| GO:0005768 | endosome                                      | 55  | -1.91 |
| GO:0005796 | Golgi lumen                                   | 15  | -1.85 |
| GO:0030496 | midbody                                       | 16  | -1.83 |
| GO:0031975 | envelope                                      | 67  | -1.80 |
| GO:0001726 | ruffle                                        | 15  | -1.62 |
| GO:0005743 | mitochondrial inner membrane                  | 33  | -1.40 |
| GO:0001772 | immunological synapse                         | 7   | -1.39 |

\* Bonferroni corrected p-value

Supplemental Table 5. Human Distal Aortic Protein GO Terms: Biologic Process (top 100 GO Terms)

| <u>GO Term ID</u> | <u>Description</u>                                     | <u># of proteins</u> | <u>log(p-value)*</u> |
|-------------------|--------------------------------------------------------|----------------------|----------------------|
| GO:0044699        | single-organism process                                | 619                  | -48.11               |
| GO:0044763        | single-organism cellular process                       | 563                  | -36.27               |
| GO:0016192        | vesicle-mediated transport                             | 153                  | -35.49               |
| GO:0071840        | cellular component organization or biogenesis          | 341                  | -33.98               |
| GO:0030198        | extracellular matrix organization                      | 65                   | -31.62               |
| GO:0043062        | extracellular structure organization                   | 65                   | -31.50               |
| GO:0009987        | cellular process                                       | 627                  | -30.47               |
| GO:0065008        | regulation of biological quality                       | 217                  | -29.55               |
| GO:0006897        | endocytosis                                            | 91                   | -28.49               |
| GO:0009611        | response to wounding                                   | 93                   | -27.77               |
| GO:0051179        | localization                                           | 312                  | -27.74               |
| GO:0044710        | single-organism metabolic process                      | 305                  | -27.74               |
| GO:0051234        | establishment of localization                          | 273                  | -27.69               |
| GO:0044707        | single-multicellular organism process                  | 269                  | -25.07               |
| GO:0072376        | protein activation cascade                             | 53                   | -24.66               |
| GO:0050896        | response to stimulus                                   | 394                  | -24.21               |
| GO:0006950        | response to stress                                     | 227                  | -23.16               |
| GO:0009056        | catabolic process                                      | 166                  | -22.89               |
| GO:0022607        | cellular component assembly                            | 168                  | -22.02               |
| GO:0032501        | multicellular organismal process                       | 299                  | -21.59               |
| GO:0042060        | wound healing                                          | 66                   | -20.86               |
| GO:0002576        | platelet degranulation                                 | 35                   | -20.30               |
| GO:0051128        | regulation of cellular component organization          | 154                  | -19.28               |
| GO:0002253        | activation of immune response                          | 79                   | -18.96               |
| GO:0050817        | coagulation                                            | 55                   | -18.75               |
| GO:0044085        | cellular component biogenesis                          | 172                  | -18.56               |
| GO:0006956        | complement activation                                  | 44                   | -18.46               |
| GO:0071822        | protein complex subunit organization                   | 132                  | -18.41               |
| GO:0030029        | actin filament-based process                           | 70                   | -18.28               |
| GO:0050778        | positive regulation of immune response                 | 84                   | -17.99               |
| GO:0048518        | positive regulation of biological process              | 284                  | -17.96               |
| GO:0044767        | single-organism developmental process                  | 237                  | -17.90               |
| GO:0032502        | developmental process                                  | 241                  | -17.11               |
| GO:0002376        | immune system process                                  | 164                  | -16.96               |
| GO:0072524        | pyridine-containing compound metabolic process         | 32                   | -16.94               |
| GO:0048584        | positive regulation of response to stimulus            | 146                  | -16.83               |
| GO:0022610        | biological adhesion                                    | 102                  | -16.71               |
| GO:0006959        | humoral immune response                                | 52                   | -16.68               |
| GO:0007155        | cell adhesion                                          | 101                  | -16.42               |
| GO:0065007        | biological regulation                                  | 470                  | -16.36               |
| GO:0050878        | regulation of body fluid levels                        | 58                   | -16.28               |
| GO:0006457        | protein folding                                        | 38                   | -15.70               |
| GO:0050789        | regulation of biological process                       | 450                  | -15.68               |
| GO:0046496        | nicotinamide nucleotide metabolic process              | 29                   | -15.42               |
| GO:0008152        | metabolic process                                      | 464                  | -15.20               |
| GO:0007010        | cytoskeleton organization                              | 87                   | -14.69               |
| GO:0034446        | substrate adhesion-dependent cell spreading            | 24                   | -14.53               |
| GO:0061621        | canonical glycolysis                                   | 17                   | -14.49               |
| GO:0048583        | regulation of response to stimulus                     | 216                  | -14.37               |
| GO:0006909        | phagocytosis                                           | 49                   | -14.10               |
| GO:0051130        | positive regulation of cellular component organization | 89                   | -13.45               |

|            |                                                      |     |        |
|------------|------------------------------------------------------|-----|--------|
| GO:0002673 | regulation of acute inflammatory response            | 22  | -13.44 |
| GO:0080134 | regulation of response to stress                     | 111 | -13.32 |
| GO:0030036 | actin cytoskeleton organization                      | 56  | -13.31 |
| GO:0002252 | immune effector process                              | 78  | -13.28 |
| GO:0002526 | acute inflammatory response                          | 25  | -13.27 |
| GO:0032879 | regulation of localization                           | 142 | -13.25 |
| GO:0002682 | regulation of immune system process                  | 114 | -12.82 |
| GO:0030162 | regulation of proteolysis                            | 68  | -12.73 |
| GO:0055114 | oxidation-reduction process                          | 58  | -12.73 |
| GO:0006928 | cellular component movement                          | 113 | -12.60 |
| GO:0051641 | cellular localization                                | 167 | -12.51 |
| GO:0009605 | response to external stimulus                        | 121 | -12.35 |
| GO:0048522 | positive regulation of cellular process              | 233 | -12.27 |
| GO:0044281 | small molecule metabolic process                     | 132 | -12.26 |
| GO:0048519 | negative regulation of biological process            | 225 | -12.14 |
| GO:1901564 | organonitrogen compound metabolic process            | 146 | -11.89 |
| GO:0006955 | immune response                                      | 116 | -11.72 |
| GO:0006508 | proteolysis                                          | 110 | -11.63 |
| GO:0071704 | organic substance metabolic process                  | 428 | -11.53 |
| GO:0043086 | negative regulation of catalytic activity            | 71  | -11.48 |
| GO:0006165 | nucleoside diphosphate phosphorylation               | 21  | -11.30 |
| GO:0003012 | muscle system process                                | 44  | -11.18 |
| GO:0033036 | macromolecule localization                           | 141 | -10.70 |
| GO:0051246 | regulation of protein metabolic process              | 149 | -10.69 |
| GO:0046939 | nucleotide phosphorylation                           | 21  | -10.65 |
| GO:0006952 | defense response                                     | 105 | -10.41 |
| GO:0034329 | cell junction assembly                               | 31  | -10.36 |
| GO:0006796 | phosphate-containing compound metabolic process      | 166 | -10.31 |
| GO:0006082 | organic acid metabolic process                       | 81  | -10.23 |
| GO:0008104 | protein localization                                 | 125 | -10.21 |
| GO:0032101 | regulation of response to external stimulus          | 74  | -10.17 |
| GO:0042221 | response to chemical                                 | 192 | -10.11 |
| GO:0010941 | regulation of cell death                             | 92  | -10.08 |
| GO:0019752 | carboxylic acid metabolic process                    | 74  | -9.90  |
| GO:0009205 | purine ribonucleoside triphosphate metabolic process | 34  | -9.73  |
| GO:0044092 | negative regulation of molecular function            | 80  | -9.69  |
| GO:0016052 | carbohydrate catabolic process                       | 26  | -9.64  |
| GO:0009888 | tissue development                                   | 91  | -9.63  |
| GO:0050794 | regulation of cellular process                       | 408 | -9.60  |
| GO:0034330 | cell junction organization                           | 34  | -9.47  |
| GO:0006793 | phosphorus metabolic process                         | 166 | -9.44  |
| GO:0021762 | substantia nigra development                         | 17  | -9.42  |
| GO:0051716 | cellular response to stimulus                        | 308 | -9.32  |
| GO:0070887 | cellular response to chemical stimulus               | 143 | -9.31  |
| GO:0046907 | intracellular transport                              | 123 | -9.31  |
| GO:0051604 | protein maturation                                   | 40  | -9.17  |
| GO:0065009 | regulation of molecular function                     | 152 | -9.02  |
| GO:0009132 | nucleoside diphosphate metabolic process             | 21  | -8.86  |
| GO:0061024 | membrane organization                                | 80  | -8.81  |

\* Bonferroni corrected p-value

Supplemental Table 6. Human Distal Aortic Protein GO Terms: Molecular Function (adj. p-value &lt; 0.05\*)

| <u>GO Term ID</u> | <u>Description</u>                                                                    | <u># of proteins</u> | <u>log(p-value)*</u> |
|-------------------|---------------------------------------------------------------------------------------|----------------------|----------------------|
| GO:0005515        | protein binding                                                                       | 583                  | -55.54               |
| GO:0005488        | binding                                                                               | 622                  | -50.52               |
| GO:0032403        | protein complex binding                                                               | 88                   | -24.65               |
| GO:0005198        | structural molecule activity                                                          | 82                   | -24.37               |
| GO:0008092        | cytoskeletal protein binding                                                          | 78                   | -23.01               |
| GO:0044822        | poly(A) RNA binding                                                                   | 124                  | -22.28               |
| GO:0043167        | ion binding                                                                           | 133                  | -19.83               |
| GO:0003723        | RNA binding                                                                           | 132                  | -19.13               |
| GO:0003779        | actin binding                                                                         | 40                   | -15.67               |
| GO:0097367        | carbohydrate derivative binding                                                       | 73                   | -15.32               |
| GO:0043168        | anion binding                                                                         | 88                   | -13.33               |
| GO:0097159        | organic cyclic compound binding                                                       | 202                  | -13.19               |
| GO:0005201        | extracellular matrix structural constituent                                           | 22                   | -12.89               |
| GO:0019899        | enzyme binding                                                                        | 116                  | -12.87               |
| GO:0005200        | structural constituent of cytoskeleton                                                | 23                   | -12.12               |
| GO:0004857        | enzyme inhibitor activity                                                             | 42                   | -11.07               |
| GO:1901363        | heterocyclic compound binding                                                         | 191                  | -10.72               |
| GO:0005102        | receptor binding                                                                      | 95                   | -10.09               |
| GO:0005539        | glycosaminoglycan binding                                                             | 25                   | -9.33                |
| GO:0042802        | identical protein binding                                                             | 82                   | -8.64                |
| GO:0016616        | oxidoreductase activity, acting on the CH-OH group of donors, NAD or NADP as acceptor | 22                   | -8.62                |
| GO:0030234        | enzyme regulator activity                                                             | 67                   | -8.46                |
| GO:0003824        | catalytic activity                                                                    | 252                  | -8.28                |
| GO:0050839        | cell adhesion molecule binding                                                        | 27                   | -8.14                |
| GO:0036094        | small molecule binding                                                                | 63                   | -8.00                |
| GO:0043169        | cation binding                                                                        | 67                   | -7.86                |
| GO:0046872        | metal ion binding                                                                     | 62                   | -7.49                |
| GO:0016614        | oxidoreductase activity, acting on CH-OH group of donors                              | 22                   | -7.44                |
| GO:0016209        | antioxidant activity                                                                  | 16                   | -7.42                |
| GO:0034987        | immunoglobulin receptor binding                                                       | 12                   | -7.41                |
| GO:0016787        | hydrolase activity                                                                    | 125                  | -6.60                |
| GO:0016491        | oxidoreductase activity                                                               | 52                   | -6.36                |
| GO:0003924        | GTPase activity                                                                       | 24                   | -5.80                |
| GO:0004866        | endopeptidase inhibitor activity                                                      | 20                   | -5.73                |
| GO:0008289        | lipid binding                                                                         | 43                   | -5.68                |
| GO:0044548        | S100 protein binding                                                                  | 8                    | -5.64                |
| GO:0005178        | integrin binding                                                                      | 17                   | -5.56                |
| GO:0004175        | endopeptidase activity                                                                | 43                   | -5.41                |
| GO:1901681        | sulfur compound binding                                                               | 21                   | -5.15                |
| GO:0003676        | nucleic acid binding                                                                  | 147                  | -4.95                |
| GO:0005518        | collagen binding                                                                      | 13                   | -4.86                |
| GO:0019901        | protein kinase binding                                                                | 39                   | -4.80                |
| GO:0016817        | hydrolase activity, acting on acid anhydrides                                         | 51                   | -4.75                |
| GO:0008201        | heparin binding                                                                       | 16                   | -4.71                |
| GO:0051082        | unfolded protein binding                                                              | 14                   | -4.65                |
| GO:0048306        | calcium-dependent protein binding                                                     | 12                   | -4.57                |
| GO:0051920        | peroxiredoxin activity                                                                | 5                    | -4.38                |
| GO:0001948        | glycoprotein binding                                                                  | 14                   | -4.19                |
| GO:0016835        | carbon-oxygen lyase activity                                                          | 13                   | -4.03                |
| GO:0005509        | calcium ion binding                                                                   | 27                   | -4.02                |
| GO:0005496        | steroid binding                                                                       | 14                   | -4.02                |
| GO:0001848        | complement binding                                                                    | 7                    | -3.81                |
| GO:0016684        | oxidoreductase activity, acting on peroxide as acceptor                               | 10                   | -3.78                |
| GO:1901265        | nucleoside phosphate binding                                                          | 42                   | -3.56                |

|            |                                                                 |    |       |
|------------|-----------------------------------------------------------------|----|-------|
| GO:0032561 | guanyl ribonucleotide binding                                   | 18 | -3.45 |
| GO:0019001 | guanyl nucleotide binding                                       | 18 | -3.40 |
| GO:0046914 | transition metal ion binding                                    | 33 | -3.25 |
| GO:0008233 | peptidase activity                                              | 47 | -3.22 |
| GO:0017171 | serine hydrolase activity                                       | 31 | -3.20 |
| GO:0008307 | structural constituent of muscle                                | 10 | -3.17 |
| GO:0001882 | nucleoside binding                                              | 33 | -3.03 |
| GO:0016829 | lyase activity                                                  | 18 | -2.94 |
| GO:0046983 | protein dimerization activity                                   | 52 | -2.88 |
| GO:0070325 | lipoprotein particle receptor binding                           | 7  | -2.71 |
| GO:0016853 | isomerase activity                                              | 17 | -2.69 |
| GO:0031625 | ubiquitin protein ligase binding                                | 25 | -2.67 |
| GO:0048037 | cofactor binding                                                | 17 | -2.64 |
| GO:0044389 | small conjugating protein ligase binding                        | 25 | -2.58 |
| GO:0019003 | GDP binding                                                     | 10 | -2.56 |
| GO:0015485 | cholesterol binding                                             | 9  | -2.53 |
| GO:0042803 | protein homodimerization activity                               | 43 | -2.45 |
| GO:0043178 | alcohol binding                                                 | 12 | -2.32 |
| GO:0044325 | ion channel binding                                             | 13 | -2.01 |
| GO:0023026 | MHC class II protein complex binding                            | 6  | -1.87 |
| GO:0060228 | phosphatidylcholine-sterol O-acyltransferase activator activity | 4  | -1.80 |
| GO:0097493 | structural molecule activity conferring elasticity              | 4  | -1.80 |
| GO:0001846 | opsonin binding                                                 | 5  | -1.80 |
| GO:0044183 | protein binding involved in protein folding                     | 5  | -1.80 |
| GO:0048407 | platelet-derived growth factor binding                          | 5  | -1.80 |
| GO:0005507 | copper ion binding                                              | 8  | -1.70 |
| GO:0017127 | cholesterol transporter activity                                | 5  | -1.58 |
| GO:0003823 | antigen binding                                                 | 26 | -1.58 |
| GO:0008426 | protein kinase C inhibitor activity                             | 3  | -1.52 |
| GO:0070653 | high-density lipoprotein particle receptor binding              | 3  | -1.52 |
| GO:0050998 | nitric-oxide synthase binding                                   | 4  | -1.44 |
| GO:0023023 | MHC protein complex binding                                     | 6  | -1.42 |
| GO:0016860 | intramolecular oxidoreductase activity                          | 8  | -1.34 |
| GO:0019843 | rRNA binding                                                    | 8  | -1.34 |

\* Bonferroni corrected p-value

Supplemental Table 7. Human Distal Aortic Protein GO Terms: Cellular Component (adj. p-value &lt; 0.05\*)

| <u>GO Term ID</u> | <u>Description</u>                         | <u># of proteins</u> | <u>log(p-value)*</u> |
|-------------------|--------------------------------------------|----------------------|----------------------|
| GO:0070062        | extracellular vesicular exosome            | 527                  | -290.88              |
| GO:0031982        | vesicle                                    | 542                  | -260.54              |
| GO:0005576        | extracellular region                       | 566                  | -257.72              |
| GO:0005925        | focal adhesion                             | 133                  | -90.24               |
| GO:0072562        | blood microparticle                        | 85                   | -71.70               |
| GO:0030054        | cell junction                              | 145                  | -61.99               |
| GO:0044444        | cytoplasmic part                           | 491                  | -61.48               |
| GO:0031012        | extracellular matrix                       | 87                   | -58.30               |
| GO:0005829        | cytosol                                    | 289                  | -54.61               |
| GO:0043226        | organelle                                  | 654                  | -52.71               |
| GO:0043227        | membrane-bounded organelle                 | 631                  | -50.45               |
| GO:0005737        | cytoplasm                                  | 548                  | -40.32               |
| GO:0015629        | actin cytoskeleton                         | 76                   | -29.42               |
| GO:0005856        | cytoskeleton                               | 149                  | -26.01               |
| GO:0060205        | cytoplasmic membrane-bounded vesicle lumen | 37                   | -24.40               |
| GO:0031983        | vesicle lumen                              | 37                   | -24.22               |
| GO:0005578        | proteinaceous extracellular matrix         | 41                   | -22.83               |
| GO:0032991        | macromolecular complex                     | 250                  | -17.78               |
| GO:0005788        | endoplasmic reticulum lumen                | 37                   | -15.26               |
| GO:0043228        | non-membrane-bounded organelle             | 214                  | -15.03               |
| GO:0044433        | cytoplasmic vesicle part                   | 62                   | -13.77               |
| GO:0043234        | protein complex                            | 210                  | -13.72               |
| GO:0016020        | membrane                                   | 370                  | -13.17               |
| GO:0031091        | platelet alpha granule                     | 23                   | -12.06               |
| GO:0045121        | membrane raft                              | 31                   | -11.05               |
| GO:0044449        | contractile fiber part                     | 27                   | -10.63               |
| GO:0044424        | intracellular part                         | 587                  | -10.34               |
| GO:0043292        | contractile fiber                          | 27                   | -9.83                |
| GO:0005622        | intracellular                              | 591                  | -9.44                |
| GO:0044437        | vacuolar part                              | 60                   | -8.97                |
| GO:0005885        | Arp2/3 protein complex                     | 8                    | -8.76                |
| GO:0005773        | vacuole                                    | 81                   | -8.73                |
| GO:0044422        | organelle part                             | 399                  | -8.62                |
| GO:0005581        | collagen trimer                            | 13                   | -8.35                |
| GO:0012505        | endomembrane system                        | 192                  | -8.34                |
| GO:0034358        | plasma lipoprotein particle                | 11                   | -7.38                |
| GO:0044446        | intracellular organelle part               | 387                  | -7.24                |
| GO:0009986        | cell surface                               | 55                   | -7.05                |
| GO:0032994        | protein-lipid complex                      | 11                   | -6.86                |
| GO:0042571        | immunoglobulin complex, circulating        | 11                   | -6.86                |
| GO:0098589        | membrane region                            | 53                   | -6.82                |
| GO:0048471        | perinuclear region of cytoplasm            | 40                   | -6.76                |
| GO:0098644        | complex of collagen trimers                | 10                   | -6.51                |
| GO:0005832        | chaperonin-containing T-complex            | 7                    | -6.44                |
| GO:0019814        | immunoglobulin complex                     | 11                   | -6.40                |
| GO:0042383        | sarcolemma                                 | 13                   | -5.30                |
| GO:0044448        | cell cortex part                           | 16                   | -5.21                |
| GO:0009897        | external side of plasma membrane           | 21                   | -5.11                |
| GO:0098552        | side of membrane                           | 38                   | -4.85                |
| GO:0001725        | stress fiber                               | 11                   | -4.80                |
| GO:0005884        | actin filament                             | 13                   | -4.72                |
| GO:0032432        | actin filament bundle                      | 11                   | -4.66                |
| GO:0071944        | cell periphery                             | 228                  | -4.54                |
| GO:0043229        | intracellular organelle                    | 492                  | -4.40                |
| GO:0042995        | cell projection                            | 66                   | -4.36                |
| GO:0044853        | plasma membrane raft                       | 13                   | -4.31                |



|            |                                          |     |       |
|------------|------------------------------------------|-----|-------|
| GO:0005811 | lipid particle                           | 12  | -4.09 |
| GO:0005577 | fibrinogen complex                       | 6   | -4.01 |
| GO:0042641 | actomyosin                               | 11  | -4.01 |
| GO:0005874 | microtubule                              | 23  | -3.96 |
| GO:0044445 | cytosolic part                           | 25  | -3.91 |
| GO:0005886 | plasma membrane                          | 221 | -3.64 |
| GO:0031252 | cell leading edge                        | 24  | -3.54 |
| GO:0005938 | cell cortex                              | 18  | -3.53 |
| GO:0005768 | endosome                                 | 49  | -3.01 |
| GO:0005783 | endoplasmic reticulum                    | 85  | -2.95 |
| GO:0001527 | microfibril                              | 5   | -2.75 |
| GO:0044464 | cell part                                | 635 | -2.69 |
| GO:0005623 | cell                                     | 635 | -2.58 |
| GO:0005796 | Golgi lumen                              | 14  | -2.50 |
| GO:0045259 | proton-transporting ATP synthase complex | 7   | -2.46 |
| GO:0001726 | ruffle                                   | 14  | -2.33 |
| GO:0005769 | early endosome                           | 25  | -2.23 |
| GO:0001772 | immunological synapse                    | 7   | -2.16 |
| GO:0044432 | endoplasmic reticulum part               | 60  | -2.10 |
| GO:0098643 | banded collagen fibril                   | 5   | -1.88 |
| GO:0005882 | intermediate filament                    | 9   | -1.69 |
| GO:0031838 | haptoglobin-hemoglobin complex           | 3   | -1.60 |
| GO:0030904 | retromer complex                         | 6   | -1.37 |

\* Bonferroni corrected p-value

**Supplemental Table 8. Enriched Ingenuity Canonical Pathways Among 944 Human LAD Proteins (FDR<0.001)**

|                                                                       | -log(B-H p-value) |                                                      | -log(B-H p-value) |
|-----------------------------------------------------------------------|-------------------|------------------------------------------------------|-------------------|
| Acute Phase Response Signaling                                        | 23.60             | α-Adrenergic Signaling                               | 5.21              |
| LXR/RXR Activation                                                    | 22.00             | ERK/MAPK Signaling                                   | 4.90              |
| Complement System                                                     | 19.00             | Regulation of Cellular Mechanics by Calpain Protease | 4.76              |
| Clathrin-mediated Endocytosis Signaling                               | 17.80             | Protein Kinase A Signaling                           | 4.71              |
| FXR/RXR Activation                                                    | 16.80             | Noradrenaline and Adrenaline Degradation             | 4.64              |
| Integrin Signaling                                                    | 16.40             | Phospholipase C Signaling                            | 4.57              |
| Mitochondrial Dysfunction                                             | 14.20             | HIPPO signaling                                      | 4.57              |
| Glycolysis I                                                          | 13.60             | Dopamine Receptor Signaling                          | 4.46              |
| Actin Cytoskeleton Signaling                                          | 13.50             | Paxillin Signaling                                   | 4.38              |
| RhoGDI Signaling                                                      | 13.00             | Extrinsic Prothrombin Activation Pathway             | 4.36              |
| Signaling by Rho Family GTPases                                       | 11.90             | IL-12 Signaling and Production in Macrophages        | 4.34              |
| RhoA Signaling                                                        | 11.60             | Breast Cancer Regulation by Stathmin1                | 4.31              |
| Regulation of Actin-based Motility by Rho                             | 11.00             | PI3K/AKT Signaling                                   | 4.31              |
| Remodeling of Epithelial Adherens Junctions                           | 10.10             | Germ Cell-Sertoli Cell Junction Signaling            | 4.25              |
| Actin Nucleation by ARP-WASP Complex                                  | 9.65              | Glutaryl-CoA Degradation                             | 4.12              |
| NRF2-mediated Oxidative Stress Response                               | 9.21              | EIF2 Signaling                                       | 4.08              |
| Coagulation System                                                    | 9.21              | Glutathione Redox Reactions I                        | 4.00              |
| Gluconeogenesis I                                                     | 9.21              | Superoxide Radicals Degradation                      | 3.98              |
| Atherosclerosis Signaling                                             | 8.53              | IGF-1 Signaling                                      | 3.90              |
| TCA Cycle II (Eukaryotic)                                             | 8.50              | Regulation of eIF4 and p70S6K Signaling              | 3.87              |
| ILK Signaling                                                         | 8.36              | Tryptophan Degradation III (Eukaryotic)              | 3.69              |
| Intrinsic Prothrombin Activation Pathway                              | 7.29              | Isoleucine Degradation I                             | 3.69              |
| Cdc42 Signaling                                                       | 7.28              | CCR3 Signaling in Eosinophils                        | 3.64              |
| Production of Nitric Oxide and Reactive Oxygen Species in Macrophages | 7.28              | Sertoli Cell-Sertoli Cell Junction Signaling         | 3.60              |
| Ephrin Receptor Signaling                                             | 7.10              | Unfolded protein response                            | 3.56              |
| Virus Entry via Endocytic Pathways                                    | 6.88              | Thrombin Signaling                                   | 3.56              |
| Protein Ubiquitination Pathway                                        | 6.87              | PPARα/RXRα Activation                                | 3.45              |
| Huntington's Disease Signaling                                        | 6.59              | Xenobiotic Metabolism Signaling                      | 3.45              |
| Oxidative Phosphorylation                                             | 6.43              | Pentose Phosphate Pathway                            | 3.44              |
| Epithelial Adherens Junction Signaling                                | 6.43              | Role of Tissue Factor in Cancer                      | 3.43              |
| Caveolar-mediated Endocytosis Signaling                               | 6.27              | Ethanol Degradation II                               | 3.36              |
| phagosome maturation                                                  | 6.14              | mTOR Signaling                                       | 3.32              |
| Glycogen Degradation II                                               | 6.02              | GDP-glucose Biosynthesis                             | 3.32              |
| Lipid Antigen Presentation by CD1                                     | 5.99              | Androgen Signaling                                   | 3.30              |
| Agrin Interactions at Neuromuscular Junction                          | 5.90              | Myc Mediated Apoptosis Signaling                     | 3.24              |
| Rac Signaling                                                         | 5.89              | Methylglyoxal Degradation III                        | 3.23              |
| G Beta Gamma Signaling                                                | 5.63              | Neuroprotective Role of THOP1 in Alzheimer's Disease | 3.22              |
| fMLP Signaling in Neutrophils                                         | 5.63              | Glutathione-mediated Detoxification                  | 3.21              |
| CDK5 Signaling                                                        | 5.59              | Axonal Guidance Signaling                            | 3.16              |
| p70S6K Signaling                                                      | 5.58              | Synaptic Long Term Potentiation                      | 3.06              |
| Ephrin B Signaling                                                    | 5.42              | 14-3-3-mediated Signaling                            | 3.06              |
| Glycogen Degradation III                                              | 5.34              | Semaphorin Signaling in Neurons                      | 3.02              |
| Fcy Receptor-mediated Phagocytosis in Macrophages and Monocytes       | 5.31              | Glucose and Glucose-1-phosphate Degradation          | 3.02              |
|                                                                       |                   | Aspartate Degradation II                             | 3.02              |

**Supplemental Table 9. Enriched Ingenuity Canonical Pathways among 725 Human Distal Aortic Proteins (FDR<0.001)**

|                                                                         | -log(B-H p-value) |                                                      | -log(B-H p-value) |
|-------------------------------------------------------------------------|-------------------|------------------------------------------------------|-------------------|
| Acute Phase Response Signaling                                          | 22.80             | IGF-1 Signaling                                      | 5.26              |
| LXR/RXR Activation                                                      | 20.90             | Phospholipase C Signaling                            | 5.26              |
| Integrin Signaling                                                      | 19.90             | Axonal Guidance Signaling                            | 5.16              |
|                                                                         |                   | Extrinsic Prothrombin Activation Pathway             | 5.12              |
| Complement System                                                       | 18.60             | Huntington's Disease Signaling                       | 4.93              |
| Clathrin-mediated Endocytosis Signaling                                 | 18.00             | Germ Cell-Sertoli Cell Junction Signaling            | 4.87              |
| FXR/RXR Activation                                                      | 16.80             | Glutaryl-CoA Degradation                             | 4.78              |
| Actin Cytoskeleton Signaling                                            | 16.80             | Glycogen Degradation III                             | 4.78              |
| RhoGDI Signaling                                                        | 15.80             | Thrombin Signaling                                   | 4.78              |
| Glycolysis I                                                            | 15.50             | Noradrenaline and Adrenaline Degradation             | 4.73              |
| Signaling by Rho Family GTPases                                         | 14.40             | Breast Cancer Regulation by Stathmin1                | 4.68              |
| RhoA Signaling                                                          | 13.70             | Ephrin B Signaling                                   | 4.68              |
| Regulation of Actin-based Motility by Rho                               | 13.60             | Protein Ubiquitination Pathway                       | 4.57              |
| Gluconeogenesis I                                                       | 12.00             | Tryptophan Degradation III (Eukaryotic)              | 4.43              |
| Actin Nucleation by ARP-WASP Complex                                    | 11.70             | Aggrin Interactions at Neuromuscular Junction        | 4.34              |
| Remodeling of Epithelial Adherens Junctions                             | 11.30             | 14-3-3-mediated Signaling                            | 4.33              |
| Intrinsic Prothrombin Activation Pathway                                | 9.84              | Sertoli Cell-Sertoli Cell Junction Signaling         | 4.26              |
| ILK Signaling                                                           | 9.81              | IL-12 Signaling and Production in Macrophages        | 4.26              |
| Caveolar-mediated Endocytosis Signaling                                 | 9.71              | Neuroprotective Role of THOP1 in Alzheimer's Disease | 4.05              |
| Coagulation System                                                      | 8.42              | Hepatic Fibrosis / Hepatic Stellate Cell Activation  | 3.99              |
| Epithelial Adherens Junction Signaling                                  | 7.88              | Pentose Phosphate Pathway                            | 3.99              |
| Atherosclerosis Signaling                                               | 7.87              | FAK Signaling                                        | 3.94              |
| Ephrin Receptor Signaling                                               | 7.61              | Lipid Antigen Presentation by CD1                    | 3.90              |
| Cdc42 Signaling                                                         | 7.36              |                                                      |                   |
| Production of Nitric Oxide and Reactive Oxygen Species in Macrophages   | 7.27              | CCR3 Signaling in Eosinophils                        | 3.89              |
| Virus Entry via Endocytic Pathways                                      | 7.16              | Unfolded protein response                            | 3.85              |
| phagosome maturation                                                    | 6.64              | Role of Tissue Factor in Cancer                      | 3.56              |
| G Beta Gamma Signaling                                                  | 6.45              | Myc Mediated Apoptosis Signaling                     | 3.51              |
| ERK/MAPK Signaling                                                      | 6.34              | Androgen Signaling                                   | 3.44              |
| Rac Signaling                                                           | 6.18              | Cellular Effects of Sildenafil (Viagra)              | 3.44              |
| p70S6K Signaling                                                        | 5.97              | Ethanol Degradation II                               | 3.26              |
| fMLP Signaling in Neutrophils                                           | 5.96              | ERK5 Signaling                                       | 3.22              |
| Regulation of Cellular Mechanics by Calpain Protease                    | 5.96              | Isoleucine Degradation I                             | 3.22              |
| PI3K/AKT Signaling                                                      | 5.84              | Synaptic Long Term Potentiation                      | 3.22              |
| CDK5 Signaling                                                          | 5.84              | Semaphorin Signaling in Neurons                      | 3.19              |
| Paxillin Signaling                                                      | 5.84              | Sucrose Degradation V (Mammalian)                    | 3.19              |
| Protein Kinase A Signaling                                              | 5.70              | Superoxide Radicals Degradation                      | 3.19              |
| NRF2-mediated Oxidative Stress Response                                 | 5.64              | Cardiac $\beta$ -adrenergic Signaling                | 3.18              |
| Mitochondrial Dysfunction                                               | 5.59              | Dopamine Receptor Signaling                          | 3.17              |
| Fc $\gamma$ Receptor-mediated Phagocytosis in Macrophages and Monocytes | 5.47              | P2Y Purigenic Receptor Signaling Pathway             | 3.17              |
| Glycogen Degradation II                                                 | 5.29              | G $\alpha$ i Signaling                               | 3.10              |
| $\alpha$ -Adrenergic Signaling                                          | 5.28              | eNOS Signaling                                       | 3.09              |
| HIPPO signaling                                                         | 5.28              | Pentose Phosphate Pathway (Oxidative Branch)         | 3.00              |

**Supplemental Table 10. Regression Models of Association Between Individual Proteins and Extent of Surface Area Involved with Fibrous Plaque (FP) or Normal Intima (NL) in Human LAD Arterial Samples (top 100 proteins).** In models of %FP, the non-FP% fraction includes fatty streaks (FS) and NML intima. Likewise, in models of %NL, the non-NL fraction includes both FP and FS. Accordingly, we modeled both %FP and %NL separately. We also classified samples into three level ordinal categories of extent of FP and extent of NL and performed ordinal logistic regression (Ord LR). This approach is less statistically powerful, but makes fewer distributional assumptions about the measures of extent of disease. In addition, we used MANOVA to jointly model the distribution of %FP, %FS and %NL. P-values and q-values  $\leq 0.05$  are highlighted in green and pink respectively. **Proteins in bold (n=21) are also included in the top 100 AA proteins**

| Uniprot ID | Protein                                      | Gene         | MANOVA (%FP,%FS) |         | GLM (%FP) |         |         | Ord LR (%FP) |         |         | GLM (%NML) |         |         | Ord LR (%NML) |         |         |
|------------|----------------------------------------------|--------------|------------------|---------|-----------|---------|---------|--------------|---------|---------|------------|---------|---------|---------------|---------|---------|
|            |                                              |              | p-value          | q-value | beta      | p-value | q-value | beta         | p-value | q-value | beta       | p-value | q-value | beta          | p-value | q-value |
| P07858     | <b>Cathepsin B</b>                           | <b>CTSB</b>  | 9.3E-09          | 5.5E-06 | 16.5      | 2.4E-08 | 1.0E-05 | -1.9         | 2.2E-05 | 1.5E-02 | -20.1      | 1.0E-08 | 7.4E-06 | 2.3           | 9.8E-06 | 5.8E-03 |
| P24821     | <b>Tenascin</b>                              | <b>TNC</b>   | 2.1E-08          | 6.3E-06 | 2.3       | 1.2E-08 | 1.0E-05 | -0.3         | 7.1E-05 | 2.4E-02 | -2.6       | 9.9E-08 | 3.6E-05 | 0.3           | 2.8E-04 | 4.2E-02 |
| Q15063     | <b>Periostin</b>                             | <b>POSTN</b> | 1.1E-06          | 2.1E-04 | 1.9       | 2.9E-06 | 7.5E-04 | -0.2         | 3.8E-04 | 3.0E-02 | -2.4       | 4.1E-07 | 9.9E-05 | 0.2           | 1.3E-04 | 2.5E-02 |
| P04114     | <b>Apolipoprotein B-100</b>                  | <b>APOB</b>  | 3.5E-06          | 5.3E-04 | 0.6       | 3.1E-05 | 3.7E-03 | -0.1         | 9.3E-04 | 4.5E-02 | -0.9       | 6.6E-07 | 1.2E-04 | 0.1           | 8.0E-04 | 7.9E-02 |
| P07996     | Thrombospondin-1                             | THBS1        | 6.3E-06          | 7.5E-04 | 2.7       | 3.3E-04 | 2.0E-02 | -0.3         | 2.8E-03 | 8.6E-02 | -4.3       | 9.2E-07 | 1.3E-04 | 0.4           | 1.3E-03 | 9.5E-02 |
| P13796     | <b>Plastin-2</b>                             | LCP1         | 1.4E-05          | 1.2E-03 | 6.5       | 3.6E-06 | 7.5E-04 | -0.7         | 2.0E-04 | 3.0E-02 | -6.9       | 4.2E-05 | 3.7E-03 | 0.5           | 9.4E-04 | 7.9E-02 |
| P07339     | <b>Cathepsin D</b>                           | <b>CTSD</b>  | 1.7E-05          | 1.3E-03 | 11.9      | 4.9E-06 | 8.3E-04 | -1.4         | 2.6E-03 | 8.6E-02 | -12.9      | 3.9E-05 | 3.7E-03 | 1.4           | 2.5E-03 | 1.1E-01 |
| Q9UBR2     | <b>Cathepsin Z</b>                           | <b>CTSZ</b>  | 1.3E-05          | 1.2E-03 | 29.6      | 2.0E-05 | 2.7E-03 | -3.9         | 2.2E-04 | 3.0E-02 | -37.3      | 5.0E-06 | 6.0E-04 | 2.7           | 8.7E-04 | 7.9E-02 |
| P50895     | <b>Basal cell adhesion molecule</b>          | <b>BCAM</b>  | 4.4E-04          | 2.2E-02 | -3.3      | 4.3E-02 | 4.0E-01 | 0.6          | 1.6E-02 | 2.3E-01 | 7.0        | 1.9E-04 | 1.4E-02 | -1.0          | 4.1E-05 | 1.2E-02 |
| P40261     | Nicotinamide N-methyltransferase             | NNMT         | 3.1E-04          | 1.7E-02 | 27.3      | 6.3E-05 | 6.6E-03 | -3.7         | 3.0E-04 | 3.0E-02 | -22.6      | 6.5E-03 | 1.2E-01 | 2.2           | 5.8E-03 | 1.2E-01 |
| P13760     | HLA class II HC Ag, DRB1-4 beta              | HLA-DRB1     | 3.0E-04          | 1.7E-02 | 18.2      | 7.5E-05 | 7.0E-03 | -1.9         | 8.4E-04 | 4.5E-02 | -19.2      | 4.7E-04 | 2.6E-02 | 1.5           | 9.0E-03 | 1.5E-01 |
| P40121     | <b>Macrophage-capping protein</b>            | <b>CAPG</b>  | 5.1E-04          | 2.2E-02 | 13.4      | 1.0E-04 | 8.5E-03 | -1.8         | 1.4E-04 | 3.0E-02 | -13.1      | 1.6E-03 | 5.9E-02 | 1.3           | 1.6E-03 | 1.0E-01 |
| O43866     | <b>CD5 antigen-like</b>                      | CD5L         | 5.0E-04          | 2.2E-02 | 11.7      | 1.3E-04 | 9.9E-03 | -1.4         | 4.1E-04 | 3.0E-02 | -12.4      | 6.7E-04 | 3.2E-02 | 0.9           | 6.2E-03 | 1.2E-01 |
| P35442     | <b>Thrombospondin-2</b>                      | <b>THBS2</b> | 8.4E-04          | 2.9E-02 | 2.3       | 3.4E-03 | 1.1E-01 | -0.3         | 8.1E-03 | 1.7E-01 | -3.5       | 1.6E-04 | 1.3E-02 | 0.2           | 1.0E-02 | 1.5E-01 |
| P07998     | Ribonuclease pancreatic                      | RNASE1       | 2.8E-04          | 1.7E-02 | 73.8      | 1.7E-04 | 1.2E-02 | -4.8         | 2.1E-02 | 2.4E-01 | -45.5      | 5.7E-02 | 3.5E-01 | 2.8           | 1.4E-01 | 3.3E-01 |
| O14773     | Tripeptidyl-peptidase 1                      | TPP1         | 7.7E-04          | 2.9E-02 | 20.8      | 1.8E-04 | 1.2E-02 | -3.6         | 3.7E-04 | 3.0E-02 | -16.3      | 1.6E-02 | 2.0E-01 | 1.6           | 1.1E-02 | 1.5E-01 |
| P01871     | <b>Ig mu chain C region</b>                  | IGHM         | 8.3E-04          | 2.9E-02 | 2.2       | 4.6E-04 | 2.3E-02 | -0.2         | 2.7E-03 | 8.6E-02 | -2.7       | 3.7E-04 | 2.4E-02 | 0.2           | 2.8E-03 | 1.1E-01 |
| P22105     | Tenascin-X                                   | TNXC         | 9.1E-04          | 3.0E-02 | 2.4       | 4.6E-04 | 2.3E-02 | -0.3         | 4.9E-04 | 3.0E-02 | -2.9       | 4.3E-04 | 2.6E-02 | 0.2           | 3.4E-03 | 1.1E-01 |
| Q15582     | TGFBI ig-h3                                  | TGFBI        | 4.3E-03          | 9.5E-02 | 2.9       | 1.2E-03 | 5.6E-02 | -0.4         | 4.4E-04 | 3.0E-02 | -3.1       | 3.8E-03 | 8.9E-02 | 0.3           | 3.0E-03 | 1.1E-01 |
| P13667     | Protein disulfide-isomerase A4               | PDIA4        | 1.5E-03          | 4.1E-02 | 16.5      | 4.5E-04 | 2.3E-02 | -1.7         | 3.5E-03 | 1.0E-01 | -18.2      | 1.2E-03 | 5.1E-02 | 1.4           | 4.3E-03 | 1.1E-01 |
| P04004     | <b>Vitronectin</b>                           | <b>VTN</b>   | 2.5E-03          | 6.2E-02 | 3.5       | 2.0E-02 | 3.2E-01 | -0.4         | 3.1E-02 | 2.5E-01 | -6.1       | 5.7E-04 | 3.0E-02 | 0.5           | 1.0E-02 | 1.5E-01 |
| P14618     | Pyruvate kinase PKM                          | PKM          | 1.7E-02          | 1.9E-01 | 3.4       | 6.5E-03 | 1.8E-01 | -0.6         | 9.2E-04 | 4.5E-02 | -3.9       | 8.5E-03 | 1.5E-01 | 0.4           | 3.7E-03 | 1.1E-01 |
| P09960     | Leukotriene A-4 hydrolase                    | LTA4H        | 9.6E-04          | 3.0E-02 | 6.0       | 5.4E-02 | 4.6E-01 | -0.7         | 1.0E-01 | 3.7E-01 | 1.9        | 6.2E-01 | 6.6E-01 | -0.3          | 3.5E-01 | 4.2E-01 |
| P00450     | <b>Ceruloplasmin</b>                         | <b>CP</b>    | 1.1E-03          | 3.2E-02 | 2.6       | 7.9E-03 | 2.0E-01 | -0.4         | 1.1E-02 | 1.9E-01 | -0.5       | 6.7E-01 | 6.8E-01 | 0.0           | 8.2E-01 | 5.7E-01 |
| P04844     | Ribophorin-2                                 | RPN2         | 3.7E-03          | 8.4E-02 | 13.8      | 2.8E-03 | 1.0E-01 | -1.7         | 5.2E-03 | 1.4E-01 | -17.7      | 1.1E-03 | 5.1E-02 | 1.5           | 3.0E-03 | 1.1E-01 |
| Q08380     | Galectin-3-binding protein                   | LGALS3BP     | 5.7E-03          | 1.1E-01 | 6.4       | 8.8E-03 | 2.2E-01 | -0.6         | 2.0E-02 | 2.4E-01 | -9.2       | 1.3E-03 | 5.3E-02 | 0.7           | 1.3E-02 | 1.8E-01 |
| P08519     | Apolipoprotein(a)                            | LPA          | 6.5E-03          | 1.2E-01 | 23.3      | 1.5E-02 | 2.7E-01 | -3.0         | 7.8E-03 | 1.7E-01 | -35.8      | 1.5E-03 | 5.6E-02 | 2.8           | 8.0E-03 | 1.4E-01 |
| Q03135     | Caveolin-1                                   | CAV1         | 4.6E-03          | 9.8E-02 | -10.0     | 2.5E-03 | 9.4E-02 | 2.0          | 1.6E-03 | 6.9E-02 | 12.3       | 1.8E-03 | 6.1E-02 | -1.1          | 3.8E-03 | 1.1E-01 |
| P07900     | Heat shock protein HSP 90-alpha              | HSP90AA1     | 1.6E-03          | 4.3E-02 | 1.6       | 1.2E-01 | 6.0E-01 | 0.0          | 8.1E-01 | 6.7E-01 | 1.0        | 4.1E-01 | 5.9E-01 | -0.1          | 1.6E-01 | 3.5E-01 |
| P30153     | PP2A subunit A isoform PR65-alpha            | PPP2R1A      | 2.0E-03          | 5.1E-02 | 0.4       | 8.9E-01 | 8.8E-01 | -0.1         | 8.9E-01 | 6.8E-01 | 7.8        | 3.4E-02 | 2.8E-01 | -0.7          | 3.2E-02 | 2.2E-01 |
| P12955     | Xaa-Pro dipeptidase                          | PEPD         | 6.8E-03          | 1.2E-01 | 32.3      | 2.1E-03 | 9.3E-02 | -3.2         | 9.6E-03 | 1.8E-01 | -35.3      | 4.8E-03 | 1.0E-01 | 2.6           | 1.6E-02 | 1.9E-01 |
| O15511     | Actin-related protein 2/3 complex subunit 5  | ARPC5        | 6.8E-03          | 1.2E-01 | 30.5      | 2.3E-03 | 9.4E-02 | -3.9         | 2.1E-03 | 8.6E-02 | -21.2      | 8.0E-02 | 4.0E-01 | 2.0           | 6.2E-02 | 2.8E-01 |
| P48163     | NADP-dependent malic enzyme                  | ME1          | 9.4E-03          | 1.5E-01 | -5.2      | 2.3E-02 | 3.3E-01 | 0.8          | 4.3E-02 | 2.9E-01 | 8.1        | 2.2E-03 | 7.2E-02 | -1.0          | 3.8E-03 | 1.1E-01 |
| P01023     | <b>Alpha-2-macroglobulin</b>                 | <b>A2M</b>   | 9.9E-03          | 1.5E-01 | 1.7       | 3.3E-03 | 1.1E-01 | -0.3         | 2.2E-03 | 8.6E-02 | -1.8       | 6.0E-03 | 1.2E-01 | 0.1           | 2.8E-02 | 2.1E-01 |
| Q8WX93     | Palladin                                     | PALLD        | 2.1E-02          | 2.2E-01 | -2.6      | 9.8E-02 | 5.5E-01 | 0.6          | 1.2E-02 | 2.0E-01 | 4.9        | 6.6E-03 | 1.2E-01 | -0.6          | 2.2E-03 | 1.1E-01 |
| Q6NZ12     | Polymerase I and transcript release factor   | PTRF         | 1.3E-02          | 1.7E-01 | -5.9      | 1.9E-02 | 3.2E-01 | 1.6          | 2.5E-03 | 8.6E-02 | 8.7        | 3.2E-03 | 8.7E-02 | -0.9          | 5.8E-03 | 1.2E-01 |
| O43396     | Thioredoxin-like protein 1                   | TXNL1        | 8.0E-03          | 1.4E-01 | 45.9      | 2.5E-03 | 9.4E-02 | -4.8         | 6.4E-03 | 1.5E-01 | -33.4      | 6.7E-02 | 3.8E-01 | 2.5           | 9.2E-02 | 2.8E-01 |
| P27169     | <b>Serum paraoxonase/arylesterase 1</b>      | <b>PON1</b>  | 1.1E-02          | 1.5E-01 | 6.9       | 2.8E-02 | 3.4E-01 | -0.6         | 8.2E-02 | 3.5E-01 | -11.1      | 2.6E-03 | 7.8E-02 | 1.0           | 3.1E-02 | 2.2E-01 |
| Q9NZN4     | EH domain-containing protein 2               | EHD2         | 3.1E-03          | 7.4E-02 | -1.2      | 2.0E-01 | 6.9E-01 | 0.2          | 4.7E-02 | 2.9E-01 | 3.3        | 2.6E-03 | 7.8E-02 | -0.3          | 5.6E-03 | 1.2E-01 |
| P00352     | Retinal dehydrogenase 1                      | ALDH1A1      | 1.4E-02          | 1.7E-01 | -1.9      | 6.5E-03 | 1.8E-01 | 0.3          | 2.8E-03 | 8.6E-02 | 2.3        | 5.4E-03 | 1.1E-01 | -0.2          | 8.1E-03 | 1.4E-01 |
| Q13885     | Tubulin beta-2A chain                        | TUBB2A       | 8.5E-03          | 1.4E-01 | -0.8      | 8.1E-02 | 5.3E-01 | 0.1          | 2.7E-02 | 2.5E-01 | 1.6        | 2.8E-03 | 8.1E-02 | -0.1          | 1.1E-02 | 1.5E-01 |
| P09543     | 2',3'-cyclic-nucleotide 3'-phosphodiesterase | CNP          | 1.1E-02          | 1.5E-01 | -8.7      | 7.5E-03 | 2.0E-01 | 2.3          | 8.9E-03 | 1.7E-01 | 11.4       | 3.2E-03 | 8.7E-02 | -0.9          | 2.7E-02 | 2.1E-01 |
| P62158     | Calmodulin                                   | CALM1        | 3.6E-02          | 2.8E-01 | -6.3      | 8.8E-02 | 5.4E-01 | 1.2          | 5.3E-02 | 3.0E-01 | 11.1       | 1.1E-02 | 1.7E-01 | -1.5          | 3.4E-03 | 1.1E-01 |
| Q07065     | Cytoskeleton-associated protein 4            | CKAP4        | 2.6E-02          | 2.4E-01 | 14.6      | 1.0E-02 | 2.4E-01 | -2.2         | 5.4E-03 | 1.4E-01 | -16.9      | 1.2E-02 | 1.7E-01 | 1.8           | 3.5E-03 | 1.1E-01 |
| Q9BQE3     | Tubulin alpha-1C chain                       | TUBA1C       | 8.7E-03          | 1.4E-01 | -1.0      | 1.2E-01 | 6.0E-01 | 0.2          | 5.1E-02 | 2.9E-01 | 2.1        | 3.6E-03 | 8.9E-02 | -0.2          | 2.6E-02 | 2.1E-01 |

|        |                                                 |               |         |         |       |         |         |      |         |         |       |         |         |      |         |         |
|--------|-------------------------------------------------|---------------|---------|---------|-------|---------|---------|------|---------|---------|-------|---------|---------|------|---------|---------|
| P02545 | Adenyl cyclase-associated protein 1             | CAP1          | 1.1E-02 | 1.5E-01 | -1.6  | 8.9E-02 | 5.4E-01 | 0.3  | 4.6E-02 | 2.9E-01 | 3.2   | 3.6E-03 | 8.9E-02 | -0.3 | 4.3E-03 | 1.1E-01 |
| P61160 | Actin-related protein 2                         | ACTR2         | 1.2E-02 | 1.6E-01 | 10.6  | 3.8E-03 | 1.2E-01 | -1.1 | 2.0E-02 | 2.4E-01 | -11.5 | 8.3E-03 | 1.5E-01 | 0.6  | 1.3E-01 | 3.2E-01 |
| P10768 | S-formylglutathione hydrolase                   | ESD           | 1.4E-02 | 1.7E-01 | -5.7  | 5.1E-02 | 4.5E-01 | 0.8  | 4.7E-02 | 2.9E-01 | 10.0  | 3.8E-03 | 8.9E-02 | -0.9 | 4.2E-03 | 1.1E-01 |
| P55268 | Cell division control protein 42 homolog        | CDC42         | 4.1E-02 | 2.8E-01 | -1.5  | 3.4E-02 | 3.6E-01 | 0.3  | 1.8E-02 | 2.4E-01 | 2.1   | 1.2E-02 | 1.7E-01 | -0.3 | 3.9E-03 | 1.1E-01 |
| P98095 | Fibulin-2                                       | FBLN2         | 1.6E-02 | 1.8E-01 | 3.3   | 2.6E-02 | 3.4E-01 | -0.4 | 2.9E-02 | 2.5E-01 | -5.0  | 4.1E-03 | 9.1E-02 | 0.3  | 3.5E-02 | 2.3E-01 |
| P07602 | Prosaposin                                      | PSAP          | 1.5E-02 | 1.7E-01 | 23.5  | 4.2E-03 | 1.3E-01 | -2.4 | 1.1E-02 | 1.9E-01 | -24.7 | 1.2E-02 | 1.7E-01 | 1.9  | 2.0E-02 | 2.0E-01 |
| P50395 | Rab GDP dissociation inhibitor beta             | GD12          | 3.5E-02 | 2.7E-01 | 4.9   | 2.8E-02 | 3.4E-01 | -0.9 | 4.3E-03 | 1.2E-01 | -6.7  | 1.0E-02 | 1.7E-01 | 0.7  | 4.8E-03 | 1.1E-01 |
| Q14108 | Lysosome membrane protein 2                     | SCARB2        | 1.6E-02 | 1.8E-01 | 21.8  | 9.1E-02 | 5.4E-01 | -2.7 | 4.5E-02 | 2.9E-01 | -42.3 | 5.1E-03 | 1.1E-01 | 4.3  | 4.8E-03 | 1.1E-01 |
| P13489 | Ribonuclease inhibitor                          | RNH1          | 4.9E-03 | 1.0E-01 | 3.2   | 1.5E-01 | 6.1E-01 | -0.4 | 2.6E-01 | 4.9E-01 | 1.9   | 4.8E-01 | 6.3E-01 | -0.1 | 5.7E-01 | 5.0E-01 |
| P06756 | Integrin alpha-V                                | ITGAV         | 6.6E-03 | 1.2E-01 | 29.7  | 5.4E-03 | 1.6E-01 | -2.5 | 3.7E-02 | 2.6E-01 | -14.9 | 2.5E-01 | 5.1E-01 | 1.0  | 3.3E-01 | 4.2E-01 |
| P52566 | Rho GDP-dissociation inhibitor 2                | ARHGDI2       | 2.7E-02 | 2.4E-01 | 11.3  | 1.1E-02 | 2.4E-01 | -1.5 | 5.4E-03 | 1.4E-01 | -7.3  | 1.8E-01 | 4.6E-01 | 0.5  | 2.1E-01 | 3.7E-01 |
| P53396 | ATP-citrate synthase                            | ACLY          | 2.4E-02 | 2.3E-01 | -8.9  | 3.0E-02 | 3.5E-01 | 2.4  | 3.0E-02 | 2.5E-01 | 13.2  | 6.2E-03 | 1.2E-01 | -2.0 | 8.4E-03 | 1.4E-01 |
| Q15746 | Myosin light chain kinase, smooth muscle        | MYLK          | 3.2E-02 | 2.6E-01 | -1.6  | 3.5E-01 | 7.4E-01 | 0.7  | 1.4E-02 | 2.1E-01 | 4.5   | 2.2E-02 | 2.3E-01 | -0.5 | 6.9E-03 | 1.3E-01 |
| P12111 | <b>Collagen alpha-3(VI) chain</b>               | <b>COL6A3</b> | 6.8E-02 | 3.2E-01 | 0.6   | 2.0E-02 | 3.2E-01 | -0.1 | 7.1E-03 | 1.6E-01 | -0.6  | 5.8E-02 | 3.6E-01 | 0.0  | 7.4E-02 | 2.8E-01 |
| P00488 | <b>Coagulation factor XIII A chain</b>          | <b>F13A1</b>  | 1.2E-01 | 3.8E-01 | 3.8   | 4.1E-02 | 4.0E-01 | -0.6 | 7.6E-03 | 1.7E-01 | -4.0  | 7.1E-02 | 3.9E-01 | 0.3  | 9.0E-02 | 2.8E-01 |
| O43852 | Calumenin                                       | CALU          | 2.9E-02 | 2.6E-01 | 30.0  | 7.7E-03 | 2.0E-01 | -3.0 | 2.3E-02 | 2.4E-01 | -28.2 | 3.6E-02 | 2.9E-01 | 2.5  | 3.9E-02 | 2.4E-01 |
| P49327 | Protein CutA                                    | CUTA          | 4.6E-02 | 2.8E-01 | -0.6  | 2.5E-02 | 3.4E-01 | 0.1  | 2.2E-02 | 2.4E-01 | 0.7   | 1.6E-02 | 2.0E-01 | -0.1 | 8.3E-03 | 1.4E-01 |
| P31146 | <b>Coronin-1A</b>                               | <b>CORO1A</b> | 4.7E-02 | 2.8E-01 | 7.8   | 1.4E-02 | 2.6E-01 | -1.0 | 8.3E-03 | 1.7E-01 | -6.6  | 7.9E-02 | 4.0E-01 | 0.6  | 5.4E-02 | 2.8E-01 |
| Q9BXN1 | Asporin                                         | ASPN          | 3.1E-02 | 2.6E-01 | 11.4  | 1.1E-02 | 2.4E-01 | -1.4 | 8.9E-03 | 1.7E-01 | -12.9 | 1.6E-02 | 2.0E-01 | 0.9  | 4.3E-02 | 2.5E-01 |
| Q15847 | Adipogenesis regulatory factor                  | ADIRF         | 1.1E-01 | 3.8E-01 | -12.9 | 4.8E-02 | 4.2E-01 | 1.8  | 8.3E-02 | 3.5E-01 | 15.1  | 5.1E-02 | 3.4E-01 | -2.0 | 9.1E-03 | 1.5E-01 |
| P02649 | <b>Apolipoprotein E</b>                         | <b>APOE</b>   | 3.3E-02 | 2.7E-01 | 3.0   | 3.2E-02 | 3.5E-01 | -0.3 | 7.8E-02 | 3.5E-01 | -4.4  | 9.2E-03 | 1.6E-01 | 0.3  | 6.9E-02 | 2.8E-01 |
| P31949 | Protein S100-A11                                | S100A11       | 2.7E-02 | 2.4E-01 | 6.6   | 9.4E-03 | 2.3E-01 | -0.5 | 1.0E-01 | 3.7E-01 | -4.7  | 1.3E-01 | 4.3E-01 | 0.2  | 3.5E-01 | 4.2E-01 |
| P08294 | Extracellular superoxide dismutase [Cu-Zn]      | SOD3          | 9.7E-03 | 1.5E-01 | 1.0   | 7.5E-01 | 8.6E-01 | -0.1 | 8.6E-01 | 6.8E-01 | 6.2   | 9.5E-02 | 4.2E-01 | -0.4 | 2.2E-01 | 3.7E-01 |
| P43121 | Cell surface glycoprotein MUC18                 | MCAM          | 5.2E-02 | 2.9E-01 | -2.7  | 9.8E-02 | 5.5E-01 | 0.5  | 3.6E-02 | 2.6E-01 | 4.6   | 1.6E-02 | 2.0E-01 | -0.5 | 9.9E-03 | 1.5E-01 |
| P20231 | Tryptase beta-2                                 | TPSB2         | 3.2E-02 | 2.6E-01 | 6.4   | 2.1E-02 | 3.2E-01 | -0.6 | 6.2E-02 | 3.2E-01 | -8.4  | 1.0E-02 | 1.7E-01 | 0.5  | 5.6E-02 | 2.8E-01 |
| P62258 | 14-3-3 protein epsilon                          | YWHAE         | 1.6E-02 | 1.8E-01 | -1.2  | 6.6E-01 | 8.3E-01 | 0.2  | 5.4E-01 | 6.0E-01 | 7.1   | 3.2E-02 | 2.7E-01 | -0.8 | 1.0E-02 | 1.5E-01 |
| Q04828 | Aldo-keto reductase family 1 member C1          | AKR1C1        | 3.5E-02 | 2.7E-01 | -4.4  | 1.0E-02 | 2.4E-01 | 0.7  | 1.9E-02 | 2.4E-01 | 4.6   | 2.7E-02 | 2.6E-01 | -0.4 | 6.5E-02 | 2.8E-01 |
| P02656 | Apolipoprotein C-III                            | APOC3         | 3.7E-02 | 2.8E-01 | -20.2 | 3.2E-02 | 3.5E-01 | 2.9  | 7.6E-02 | 3.5E-01 | 28.4  | 1.1E-02 | 1.7E-01 | -1.7 | 1.2E-01 | 3.1E-01 |
| P12277 | Creatine kinase B-type                          | CKB           | 1.0E-01 | 3.6E-01 | -3.2  | 9.0E-02 | 5.4E-01 | 0.6  | 2.8E-02 | 2.5E-01 | 4.8   | 3.2E-02 | 2.7E-01 | -0.5 | 1.1E-02 | 1.5E-01 |
| Q01518 | Prelamin-A/C                                    | LMNA          | 1.1E-02 | 1.5E-01 | 2.7   | 1.1E-01 | 5.6E-01 | -0.2 | 2.3E-01 | 4.9E-01 | 0.7   | 7.2E-01 | 6.9E-01 | -0.2 | 2.1E-01 | 3.7E-01 |
| Q969G5 | Coronin-1B                                      | CORO1B        | 2.1E-02 | 2.2E-01 | -4.4  | 2.2E-01 | 7.1E-01 | 0.8  | 9.2E-02 | 3.5E-01 | 10.7  | 1.1E-02 | 1.7E-01 | -0.9 | 1.7E-02 | 1.9E-01 |
| P14625 | Endoplasmic HSP90B1                             | HSP90B1       | 2.3E-02 | 2.3E-01 | 4.7   | 1.6E-02 | 2.8E-01 | -0.7 | 1.1E-02 | 1.9E-01 | -2.3  | 3.2E-01 | 5.4E-01 | 0.1  | 4.9E-01 | 4.8E-01 |
| Q16527 | Cysteine and glycine-rich protein 2             | CSR2          | 2.7E-02 | 2.4E-01 | -6.7  | 1.2E-02 | 2.5E-01 | 0.8  | 2.3E-02 | 2.4E-01 | 8.0   | 1.1E-02 | 1.7E-01 | -0.6 | 2.7E-02 | 2.1E-01 |
| P12110 | Collagen alpha-2(VI) chain                      | COL6A2        | 8.0E-02 | 3.3E-01 | 1.8   | 3.3E-02 | 3.5E-01 | -0.3 | 1.2E-02 | 2.0E-01 | -2.1  | 3.6E-02 | 2.9E-01 | 0.2  | 3.5E-02 | 2.3E-01 |
| Q7Z7G0 | Target of Nesh-SH3                              | ABI3BP        | 4.4E-02 | 2.8E-01 | -3.9  | 5.9E-02 | 4.8E-01 | 0.6  | 3.1E-02 | 2.5E-01 | 6.1   | 1.2E-02 | 1.7E-01 | -0.5 | 1.6E-02 | 1.9E-01 |
| P10643 | Complement component C7                         | C7            | 4.5E-02 | 2.8E-01 | 5.7   | 1.3E-02 | 2.5E-01 | -0.5 | 8.9E-02 | 3.5E-01 | -5.1  | 5.8E-02 | 3.6E-01 | 0.2  | 3.3E-01 | 4.2E-01 |
| Q96CX2 | Chloride intracellular channel protein 6        | CLIC6         | 4.2E-02 | 2.8E-01 | 11.1  | 1.3E-02 | 2.5E-01 | -1.3 | 2.8E-02 | 2.5E-01 | -8.7  | 1.0E-01 | 4.3E-01 | 0.7  | 1.2E-01 | 3.2E-01 |
| Q99715 | Collagen alpha-1(XII) chain                     | COL12A1       | 1.4E-02 | 1.7E-01 | 0.5   | 3.7E-01 | 7.5E-01 | -0.1 | 3.6E-01 | 5.4E-01 | -1.7  | 1.3E-02 | 1.8E-01 | 0.1  | 8.1E-02 | 2.8E-01 |
| P62942 | Peptidyl-prolyl cis-trans isomerase FKBP1A      | FKBP1A        | 4.8E-02 | 2.8E-01 | -10.8 | 7.4E-02 | 5.2E-01 | 1.1  | 2.0E-01 | 4.6E-01 | 17.6  | 1.4E-02 | 1.8E-01 | -1.2 | 5.9E-02 | 2.8E-01 |
| P19105 | Myosin regulatory light chain 12A               | MYL12A        | 2.2E-01 | 4.5E-01 | -1.4  | 9.1E-02 | 5.4E-01 | 0.3  | 1.4E-02 | 2.1E-01 | 1.5   | 1.1E-01 | 4.3E-01 | -0.1 | 1.2E-01 | 3.2E-01 |
| Q16853 | Membrane primary amine oxidase                  | AOC3          | 4.3E-02 | 2.8E-01 | -2.2  | 2.3E-02 | 3.3E-01 | 0.4  | 1.4E-02 | 2.1E-01 | 2.8   | 1.5E-02 | 2.0E-01 | -0.3 | 2.8E-02 | 2.1E-01 |
| P30040 | Endoplasmic reticulum resident protein 29       | ERP29         | 5.0E-02 | 2.9E-01 | 29.3  | 1.4E-02 | 2.7E-01 | -2.7 | 7.2E-02 | 3.4E-01 | -26.0 | 6.9E-02 | 3.8E-01 | 1.6  | 1.7E-01 | 3.5E-01 |
| P09382 | Galectin-1                                      | LGALS1        | 5.7E-02 | 2.9E-01 | -1.7  | 2.9E-01 | 7.2E-01 | 0.5  | 6.0E-02 | 3.2E-01 | 4.0   | 2.8E-02 | 2.7E-01 | -0.5 | 1.4E-02 | 1.8E-01 |
| Q16658 | Fascin                                          | FSCN1         | 4.3E-02 | 2.8E-01 | 18.0  | 1.4E-02 | 2.7E-01 | -1.9 | 4.5E-02 | 2.9E-01 | -19.7 | 2.5E-02 | 2.5E-01 | 1.3  | 8.8E-02 | 2.8E-01 |
| P27824 | Calnexin                                        | CANX          | 3.2E-02 | 2.6E-01 | 6.6   | 1.5E-02 | 2.7E-01 | -0.8 | 3.5E-02 | 2.6E-01 | -4.0  | 2.3E-01 | 5.0E-01 | 0.1  | 7.0E-01 | 5.5E-01 |
| P29401 | Transketolase                                   | TKT           | 8.7E-02 | 3.3E-01 | -1.2  | 4.1E-01 | 7.6E-01 | 0.2  | 3.3E-01 | 5.4E-01 | 3.4   | 5.1E-02 | 3.4E-01 | -0.5 | 1.5E-02 | 1.9E-01 |
| P60981 | Destrin                                         | DSTN          | 6.8E-02 | 3.2E-01 | -2.0  | 3.5E-01 | 7.4E-01 | 0.4  | 2.1E-01 | 4.7E-01 | 5.2   | 3.7E-02 | 2.9E-01 | -0.6 | 1.6E-02 | 1.9E-01 |
| P00736 | <b>Complement C1r subcomponent</b>              | <b>C1R</b>    | 2.2E-02 | 2.2E-01 | 4.7   | 2.1E-02 | 3.2E-01 | -0.7 | 1.6E-02 | 2.3E-01 | -2.0  | 4.2E-01 | 6.0E-01 | 0.1  | 7.2E-01 | 5.5E-01 |
| Q12765 | Utrophin                                        | UTRN          | 1.7E-01 | 4.2E-01 | -4.9  | 4.1E-01 | 7.6E-01 | 1.3  | 1.7E-01 | 4.4E-01 | 12.1  | 8.5E-02 | 4.1E-01 | -1.8 | 1.6E-02 | 1.9E-01 |
| P30048 | Peroxioredoxin III                              | PRDX3         | 4.3E-02 | 2.8E-01 | -13.6 | 2.2E-02 | 3.3E-01 | 1.0  | 2.1E-01 | 4.7E-01 | 16.9  | 1.6E-02 | 2.0E-01 | -1.1 | 1.1E-01 | 3.0E-01 |
| P15088 | Mast cell carboxypeptidase A                    | CPA3          | 1.6E-01 | 4.2E-01 | 6.8   | 1.5E-01 | 6.3E-01 | -1.2 | 4.5E-02 | 2.9E-01 | -10.8 | 5.6E-02 | 3.5E-01 | 1.2  | 1.6E-02 | 1.9E-01 |
| O60888 | Fatty acid synthase                             | FASN          | 4.6E-02 | 2.8E-01 | -7.3  | 1.7E-01 | 6.4E-01 | 1.0  | 1.9E-01 | 4.6E-01 | 14.7  | 1.7E-02 | 2.0E-01 | -1.3 | 2.6E-02 | 2.1E-01 |
| P35555 | Fibrillin-1                                     | FBN1          | 1.0E-01 | 3.7E-01 | 0.9   | 8.2E-02 | 5.3E-01 | -0.2 | 1.7E-02 | 2.3E-01 | -1.3  | 3.3E-02 | 2.8E-01 | 0.1  | 2.4E-02 | 2.1E-01 |
| P17858 | ATP-dependent 6-phosphofructokinase, liver type | PFKL          | 8.3E-02 | 3.3E-01 | 10.1  | 4.4E-02 | 4.0E-01 | -1.6 | 1.7E-02 | 2.3E-01 | -5.6  | 3.5E-01 | 5.6E-01 | 0.4  | 4.0E-01 | 4.5E-01 |
| Q8NBX0 | UV excision repair protein RAD23 homolog A      | RAD23A        | 2.5E-01 | 4.5E-01 | 30.5  | 1.0E-01 | 5.5E-01 | -5.0 | 1.7E-02 | 2.3E-01 | -33.8 | 1.3E-01 | 4.3E-01 | 3.2  | 8.5E-02 | 2.8E-01 |

**Supplemental Table 11. Regression Models of Association Between Individual Proteins and Extent of Surface Area Involved with Fibrous Plaque (FP) or Normal (NML) in Human Abdominal Aorta Samples (top 100 proteins).** In models of %FP, the non-FP% fraction includes fatty streaks (FS) and NML intima. Likewise, in models of %NML, the non-NML fraction includes both FP and FS. Accordingly, we modeled both %FP and %NML separately. We also classified samples into three level ordinal categories of extent of FP and extent of NML and performed ordinal logistic regression (Ord LR). This approach is less statistically powerful, but makes fewer distributional assumptions about the measures of extent of disease. In addition, we used MANOVA to jointly model the distribution of %FP, %FS, and %NML. P-values and q-values  $\leq 0.05$  are highlighted in green and pink respectively. **Proteins in bold (n=21) are also included in the top 100 LAD proteins.**

| Uniprot ID | Protein                                                  | Gene     | MANOVA (%FP,%FS) |          | GLM (%FP) |          |          | Ord LR (%FP) |          |          | GLM (%NML) |          |          | Ord LR (%NML) |          |          |
|------------|----------------------------------------------------------|----------|------------------|----------|-----------|----------|----------|--------------|----------|----------|------------|----------|----------|---------------|----------|----------|
|            |                                                          |          | p-value          | q-value  | beta      | p-value  | q-value  | beta         | p-value  | q-value  | beta       | p-value  | q-value  | beta          | p-value  | q-value  |
| P04114     | <b>Apolipoprotein B-100</b>                              | APOB     | 4.08E-15         | 1.64E-12 | 1.01      | 4.17E-16 | 1.42E-13 | -0.11        | 6.33E-05 | 1.13E-02 | -0.71      | 2.08E-04 | 2.82E-02 | 0.05          | 2.32E-02 | 4.19E-01 |
| P02649     | <b>Apolipoprotein E</b>                                  | APOE     | 2.64E-14         | 5.31E-12 | 9.39      | 4.77E-15 | 8.12E-13 | -0.72        | 3.96E-04 | 2.45E-02 | -8.79      | 9.69E-07 | 4.72E-04 | 0.53          | 3.88E-03 | 4.19E-01 |
| O43866     | <b>CD5 antigen-like</b>                                  | CD5L     | 2.28E-13         | 3.06E-11 | 23.47     | 2.16E-14 | 2.45E-12 | -3.57        | 6.57E-06 | 2.35E-03 | -17.32     | 2.20E-04 | 2.82E-02 | 0.97          | 2.49E-02 | 4.19E-01 |
| P00747     | Plasminogen                                              | PLG      | 5.98E-12         | 6.01E-10 | 7.58      | 1.48E-12 | 1.26E-10 | -0.56        | 1.42E-03 | 3.05E-02 | -4.55      | 5.14E-03 | 1.43E-01 | 0.19          | 1.35E-01 | 5.04E-01 |
| P19823     | Inter-alpha-trypsin                                      | ITIH2    | 9.60E-11         | 7.72E-09 | 10.63     | 3.94E-11 | 2.68E-09 | -0.92        | 8.50E-04 | 3.05E-02 | -5.77      | 1.71E-02 | 2.61E-01 | 0.32          | 1.00E-01 | 4.76E-01 |
| P07339     | <b>Cathepsin D</b>                                       | CTSD     | 2.08E-09         | 1.11E-07 | 21.06     | 2.59E-10 | 1.37E-08 | -1.67        | 3.20E-03 | 4.29E-02 | -18.24     | 1.72E-04 | 2.82E-02 | 1.07          | 1.86E-02 | 4.19E-01 |
| P40121     | <b>Macrophage-capping protein</b>                        | CAPG     | 4.22E-10         | 2.83E-08 | 23.61     | 2.82E-10 | 1.37E-08 | -1.43        | 7.37E-03 | 6.43E-02 | -25.64     | 1.48E-06 | 4.72E-04 | 2.57          | 1.96E-03 | 4.19E-01 |
| P01892     | HLA class I HC Ag, A-2 alpha                             | HLA-A    | 3.97E-09         | 1.77E-07 | 20.85     | 4.47E-10 | 1.90E-08 | -1.76        | 4.80E-04 | 2.45E-02 | -16.10     | 1.02E-03 | 5.59E-02 | 1.05          | 1.50E-02 | 4.19E-01 |
| P27169     | <b>Serum paraoxonase 1</b>                               | PON1     | 2.22E-09         | 1.11E-07 | 19.28     | 5.05E-10 | 1.91E-08 | -1.62        | 9.99E-03 | 6.76E-02 | -11.51     | 1.23E-02 | 2.18E-01 | 0.42          | 3.21E-01 | 6.30E-01 |
| P00739     | Haptoglobin-related protein                              | HPR      | 9.08E-09         | 3.04E-07 | 14.51     | 1.11E-09 | 3.79E-08 | -1.30        | 3.52E-03 | 4.29E-02 | -10.60     | 2.40E-03 | 7.80E-02 | 0.85          | 1.74E-02 | 4.19E-01 |
| P24821     | <b>Tenascin</b>                                          | TNC      | 1.21E-08         | 3.46E-07 | 2.23      | 1.40E-09 | 4.34E-08 | -0.11        | 1.90E-02 | 8.04E-02 | -1.79      | 8.55E-04 | 5.59E-02 | 0.08          | 8.27E-02 | 4.70E-01 |
| P07858     | <b>Cathepsin B</b>                                       | CTSB     | 1.07E-08         | 3.32E-07 | 17.11     | 1.80E-09 | 5.10E-08 | -1.00        | 1.52E-02 | 7.52E-02 | -11.05     | 8.26E-03 | 1.76E-01 | 0.59          | 1.45E-01 | 5.17E-01 |
| P01871     | <b>Ig mu chain C region</b>                              | IGHM     | 5.90E-09         | 2.37E-07 | 6.48      | 1.99E-09 | 5.21E-08 | -0.77        | 1.10E-04 | 1.22E-02 | -3.53      | 2.71E-02 | 3.02E-01 | 0.18          | 1.51E-01 | 5.17E-01 |
| P13796     | <b>Plastin-2</b>                                         | LCP1     | 1.96E-08         | 5.25E-07 | 11.39     | 2.32E-09 | 5.64E-08 | -0.60        | 1.15E-02 | 6.76E-02 | -9.18      | 9.26E-04 | 5.59E-02 | 0.58          | 4.32E-02 | 4.59E-01 |
| P05090     | Apolipoprotein D                                         | APOD     | 7.70E-09         | 2.57E-07 | 23.52     | 2.15E-08 | 4.29E-07 | -1.90        | 9.70E-04 | 3.05E-02 | -7.87      | 2.04E-01 | 5.95E-01 | 0.22          | 6.12E-01 | 7.29E-01 |
| P04003     | C4b-binding protein                                      | C4BPA    | 6.04E-08         | 1.50E-06 | 6.27      | 8.23E-09 | 1.87E-07 | -0.46        | 3.30E-03 | 4.29E-02 | -4.96      | 1.64E-03 | 6.98E-02 | 0.36          | 1.08E-02 | 4.19E-01 |
| P00734     | Prothrombin                                              | F2       | 5.62E-08         | 1.33E-06 | 10.31     | 1.82E-08 | 3.86E-07 | -0.67        | 1.06E-02 | 6.76E-02 | -5.57      | 3.80E-02 | 3.20E-01 | 0.41          | 8.28E-02 | 4.70E-01 |
| P01023     | <b>Alpha-2-macroglobulin</b>                             | A2M      | 2.34E-08         | 5.89E-07 | 2.87      | 2.26E-07 | 3.50E-06 | -0.28        | 1.45E-03 | 3.05E-02 | -0.62      | 4.42E-01 | 7.70E-01 | 0.00          | 9.33E-01 | 8.06E-01 |
| P05546     | Heparin cofactor 2                                       | SERPIND  | 3.92E-07         | 7.16E-06 | 27.74     | 7.47E-08 | 1.41E-06 | -1.90        | 6.08E-03 | 5.88E-02 | -17.35     | 2.04E-02 | 2.90E-01 | 0.67          | 2.67E-01 | 6.04E-01 |
| P20742     | Pregnancy zone protein                                   | PZP      | 1.38E-07         | 2.92E-06 | 26.87     | 1.63E-07 | 2.77E-06 | -2.17        | 2.20E-02 | 8.33E-02 | -10.27     | 1.70E-01 | 5.85E-01 | 0.10          | 8.52E-01 | 7.90E-01 |
| P01031     | Complement C5                                            | C5       | 9.55E-07         | 1.60E-05 | 7.22      | 1.46E-07 | 2.61E-06 | -0.65        | 3.59E-03 | 4.29E-02 | -6.37      | 1.14E-03 | 5.59E-02 | 0.40          | 2.01E-02 | 4.19E-01 |
| P02647     | Apolipoprotein A-I                                       | APOA1    | 2.07E-07         | 3.97E-06 | 7.40      | 1.86E-07 | 3.01E-06 | -0.81        | 2.17E-03 | 3.64E-02 | -3.01      | 1.45E-01 | 5.32E-01 | -0.01         | 9.20E-01 | 8.06E-01 |
| P04179     | Superoxide dismutase                                     | SOD2     | 1.90E-07         | 3.81E-06 | 55.81     | 2.58E-07 | 3.81E-06 | -3.31        | 1.62E-02 | 7.64E-02 | -20.26     | 1.99E-01 | 5.95E-01 | 0.17          | 8.79E-01 | 7.96E-01 |
| P02671     | Fibrinogen alpha chain                                   | FGA      | 1.32E-06         | 2.12E-05 | 3.47      | 2.79E-07 | 3.95E-06 | -0.23        | 1.09E-02 | 6.76E-02 | -2.10      | 3.15E-02 | 3.10E-01 | 0.09          | 2.25E-01 | 5.97E-01 |
| Q9UJ70     | N-acetyl-D-glucosamine kinase                            | NAGK     | 3.50E-06         | 4.42E-05 | 70.08     | 5.24E-07 | 7.14E-06 | -4.04        | 5.13E-02 | 1.22E-01 | -59.67     | 2.68E-03 | 8.14E-02 | 2.25          | 2.05E-01 | 5.91E-01 |
| O14791     | Apolipoprotein L1                                        | APOL1    | 2.61E-06         | 3.62E-05 | 33.46     | 5.64E-07 | 7.39E-06 | -2.76        | 1.13E-02 | 6.76E-02 | -20.07     | 3.72E-02 | 3.20E-01 | 0.87          | 3.16E-01 | 6.29E-01 |
| P55268     | Laminin subunit beta-2                                   | LAMB2    | 5.70E-07         | 9.96E-06 | -2.91     | 2.90E-06 | 2.74E-05 | 0.23         | 9.12E-03 | 6.76E-02 | 0.59       | 5.08E-01 | 8.10E-01 | -0.03         | 6.17E-01 | 7.29E-01 |
| P02675     | Fibrinogen beta chain                                    | FBG      | 2.92E-06         | 3.91E-05 | 1.15      | 6.85E-07 | 8.40E-06 | -0.06        | 2.28E-02 | 8.33E-02 | -0.67      | 4.47E-02 | 3.43E-01 | 0.03          | 3.32E-01 | 5.99E-01 |
| P35442     | <b>Thrombospondin-2</b>                                  | THBS2    | 4.77E-06         | 5.81E-05 | 5.24      | 6.91E-07 | 8.40E-06 | -0.39        | 3.55E-03 | 4.29E-02 | -4.11      | 6.38E-03 | 1.52E-01 | 0.25          | 3.54E-02 | 4.59E-01 |
| P04080     | Cystatin-B                                               | CSTB     | 3.52E-06         | 4.42E-05 | 47.93     | 8.58E-07 | 1.01E-05 | -4.84        | 1.72E-03 | 3.43E-02 | -27.51     | 4.96E-02 | 3.51E-01 | 0.29          | 7.69E-01 | 7.66E-01 |
| O14818     | Proteasome subunit alpha type-7                          | PSMA7    | 7.03E-06         | 7.85E-05 | 88.12     | 1.08E-06 | 1.23E-05 | -5.38        | 2.07E-02 | 8.04E-02 | -63.83     | 1.34E-02 | 2.29E-01 | 1.73          | 3.78E-01 | 6.54E-01 |
| P02679     | Fibrinogen gamma                                         | FGG      | 5.91E-06         | 6.93E-05 | 2.44      | 1.21E-06 | 1.33E-05 | -0.14        | 2.33E-02 | 8.33E-02 | -1.50      | 3.78E-02 | 3.20E-01 | 0.07          | 2.14E-01 | 5.94E-01 |
| P04004     | <b>Vitronectin</b>                                       | VTN      | 6.03E-06         | 6.93E-05 | 7.65      | 1.28E-06 | 1.37E-05 | -0.62        | 7.66E-03 | 6.53E-02 | -7.42      | 8.44E-04 | 5.59E-02 | 0.41          | 2.38E-02 | 4.19E-01 |
| Q9NZU5     | LIM and cysteine-rich domains protein 1                  | LMCD1    | 2.29E-06         | 3.41E-05 | -7.02     | 1.57E-06 | 1.62E-05 | 0.82         | 4.61E-04 | 2.45E-02 | 2.88       | 1.72E-01 | 5.85E-01 | -0.20         | 1.70E-01 | 5.37E-01 |
| P11047     | Laminin subunit gamma-1                                  | LAMC1    | 2.28E-06         | 3.41E-05 | -3.59     | 6.39E-05 | 4.63E-04 | 0.29         | 2.03E-02 | 8.04E-02 | -0.14      | 9.13E-01 | 8.64E-01 | 0.00          | 9.74E-01 | 8.08E-01 |
| P98160     | Basement membrane-specific heparan sulfate               | HSPG2    | 2.44E-06         | 3.50E-05 | -1.03     | 2.30E-06 | 2.31E-05 | 0.14         | 8.44E-04 | 3.05E-02 | 0.38       | 2.28E-01 | 6.32E-01 | -0.03         | 2.61E-01 | 6.04E-01 |
| P0C0L5     | Complement C4-B                                          | C4B      | 1.77E-05         | 1.83E-04 | 3.14      | 2.83E-06 | 2.74E-05 | -0.21        | 1.97E-02 | 8.04E-02 | -2.29      | 1.66E-02 | 2.60E-01 | 0.14          | 6.14E-02 | 4.70E-01 |
| P05155     | Plasma protease C1 inhibitor                             | SERPINC1 | 2.68E-05         | 2.69E-04 | 11.82     | 5.01E-06 | 4.56E-05 | -0.94        | 1.56E-02 | 7.52E-02 | -7.73      | 3.61E-02 | 3.20E-01 | 0.50          | 6.90E-02 | 4.70E-01 |
| P11216     | Glycogen phosphorylase, brain                            | PYGB     | 3.11E-05         | 3.02E-04 | -8.84     | 5.09E-06 | 4.56E-05 | 1.29         | 1.36E-04 | 1.22E-02 | 7.49       | 6.19E-03 | 1.52E-01 | -0.54         | 8.86E-03 | 4.19E-01 |
| Q15124     | Phosphoglucosyltransferase-like protein 5                | PGM5     | 3.16E-05         | 3.02E-04 | -4.59     | 6.29E-06 | 5.48E-05 | 0.51         | 2.19E-03 | 3.64E-02 | 4.33       | 2.44E-03 | 7.80E-02 | -0.26         | 2.00E-02 | 4.19E-01 |
| O00159     | Unconventional myosin-1c                                 | MYO1C    | 8.01E-06         | 8.70E-05 | -5.81     | 4.43E-05 | 3.51E-04 | 0.60         | 4.68E-03 | 4.79E-02 | 0.67       | 7.42E-01 | 8.46E-01 | -0.02         | 8.83E-01 | 7.96E-01 |
| O15230     | Laminin subunit alpha-5                                  | LAMA5    | 8.97E-06         | 9.49E-05 | -2.00     | 4.07E-05 | 3.30E-04 | 0.17         | 1.58E-02 | 7.52E-02 | 0.27       | 6.94E-01 | 8.46E-01 | -0.01         | 8.63E-01 | 7.92E-01 |
| P02792     | Ferritin light chain                                     | FTL      | 7.19E-05         | 6.42E-04 | 13.07     | 2.71E-05 | 2.31E-04 | -0.60        | 1.33E-01 | 1.91E-01 | -14.43     | 8.40E-04 | 5.59E-02 | 0.80          | 2.17E-02 | 4.19E-01 |
| Q14315     | Filamin-C                                                | FLNC     | 1.98E-04         | 1.59E-03 | -2.67     | 3.54E-05 | 2.94E-04 | 0.33         | 2.37E-03 | 3.68E-02 | 1.96       | 3.11E-02 | 3.10E-01 | -0.11         | 9.75E-02 | 4.76E-01 |
| P08133     | Annexin A6                                               | ANXA6    | 5.29E-05         | 4.95E-04 | -4.62     | 5.31E-05 | 4.11E-04 | 0.52         | 1.08E-02 | 6.76E-02 | 1.39       | 3.91E-01 | 7.52E-01 | -0.07         | 5.45E-01 | 7.03E-01 |
| P01024     | Complement C3                                            | C3       | 2.13E-04         | 1.68E-03 | 1.78      | 5.90E-05 | 4.46E-04 | -0.11        | 5.49E-02 | 1.26E-01 | -0.96      | 1.24E-01 | 5.01E-01 | 0.05          | 2.86E-01 | 6.14E-01 |
| P52209     | 6-phosphogluconate dehydrogenase                         | PGD      | 1.76E-04         | 1.47E-03 | 19.04     | 6.06E-05 | 4.48E-04 | -0.77        | 1.96E-01 | 2.32E-01 | -9.25      | 1.69E-01 | 5.85E-01 | 0.19          | 7.16E-01 | 7.49E-01 |
| P02768     | Serum albumin                                            | ALB      | 7.09E-05         | 6.42E-04 | 0.24      | 6.86E-05 | 4.86E-04 | -0.02        | 1.81E-02 | 8.03E-02 | -0.07      | 3.99E-01 | 7.52E-01 | 0.00          | 4.40E-01 | 6.77E-01 |
| Q9UBR2     | <b>Cathepsin Z</b>                                       | CTSZ     | 1.96E-04         | 1.59E-03 | 33.51     | 7.45E-05 | 5.12E-04 | -2.14        | 3.35E-02 | 9.66E-02 | -37.34     | 1.43E-03 | 6.52E-02 | 1.49          | 1.01E-01 | 4.76E-01 |
| P21333     | Filamin-A                                                | FLNA     | 1.10E-04         | 9.59E-04 | -0.50     | 7.52E-05 | 5.12E-04 | 0.05         | 9.91E-03 | 6.76E-02 | 0.18       | 3.26E-01 | 7.06E-01 | -0.01         | 3.69E-01 | 6.54E-01 |
| P08603     | Complement factor H                                      | CFH      | 4.27E-04         | 2.85E-03 | 2.85      | 8.70E-05 | 5.80E-04 | -0.21        | 3.07E-02 | 9.31E-02 | -2.60      | 1.04E-02 | 2.03E-01 | 0.13          | 8.81E-02 | 4.70E-01 |
| Q15063     | <b>Periostin</b>                                         | POSTN    | 4.00E-04         | 2.82E-03 | 2.23      | 9.40E-05 | 6.05E-04 | -0.19        | 1.07E-02 | 6.76E-02 | -2.18      | 6.10E-03 | 1.52E-01 | 0.11          | 6.75E-02 | 4.70E-01 |
| P01042     | Kininogen-1                                              | KNKG1    | 3.26E-04         | 2.38E-03 | 10.38     | 9.43E-05 | 6.05E-04 | -0.98        | 1.13E-02 | 6.76E-02 | -5.50      | 1.43E-01 | 5.30E-01 | 0.18          | 4.84E-01 | 6.91E-01 |
| Q8N2S1     | Latent-transforming growth factor beta-binding protein 4 | LTBP4    | 2.29E-04         | 1.77E-03 | -5.71     | 1.08E-04 | 6.83E-04 | 0.54         | 1.32E-02 | 7.15E-02 | 2.35       | 2.59E-01 | 6.54E-01 | -0.06</       |          |          |

|        |                                                                |          |          |          |        |          |          |       |          |          |        |          |          |       |          |          |
|--------|----------------------------------------------------------------|----------|----------|----------|--------|----------|----------|-------|----------|----------|--------|----------|----------|-------|----------|----------|
| P04196 | Histidine-rich glycoprotein                                    | HRG      | 6.63E-04 | 4.23E-03 | 8.46   | 1.42E-04 | 8.81E-04 | -0.85 | 8.89E-03 | 6.76E-02 | -7.85  | 1.13E-02 | 2.07E-01 | 0.34  | 1.29E-01 | 5.04E-01 |
| O76070 | Gamma-synuclein                                                | SNCG     | 7.68E-04 | 4.68E-03 | 15.28  | 1.47E-04 | 8.90E-04 | -2.03 | 9.20E-04 | 3.05E-02 | -11.71 | 3.77E-02 | 3.20E-01 | 0.70  | 9.01E-02 | 4.70E-01 |
| P16112 | Aggrecan core protein                                          | ACAN     | 1.49E-04 | 1.28E-03 | -2.93  | 2.28E-04 | 1.27E-03 | 0.52  | 1.35E-03 | 3.05E-02 | 0.59   | 5.97E-01 | 8.16E-01 | -0.01 | 8.66E-01 | 7.92E-01 |
| P00450 | <b>Perulinin</b>                                               | CP       | 3.74E-04 | 2.69E-03 | 4.15   | 1.68E-04 | 1.00E-03 | -0.28 | 5.32E-02 | 1.25E-01 | -1.73  | 2.66E-01 | 6.54E-01 | 0.07  | 5.15E-01 | 6.93E-01 |
| Q9NR12 | PDZ and LIM domain protein 7                                   | PDLIM7   | 8.75E-04 | 5.05E-03 | -7.92  | 1.77E-04 | 1.04E-03 | 1.01  | 1.99E-03 | 3.64E-02 | 5.53   | 6.18E-02 | 3.84E-01 | -0.52 | 1.88E-02 | 4.19E-01 |
| P19827 | Inter-alpha-trypsin inhibitor heavy chain H1                   | ITIH1    | 1.09E-03 | 5.79E-03 | 6.68   | 2.16E-04 | 1.25E-03 | -0.62 | 1.28E-02 | 7.15E-02 | -5.58  | 2.70E-02 | 3.02E-01 | 0.32  | 8.01E-02 | 4.70E-01 |
| P35749 | Myosin-11                                                      | MYH11    | 6.78E-04 | 4.26E-03 | -0.33  | 2.24E-04 | 1.27E-03 | 0.03  | 1.54E-02 | 7.52E-02 | 0.16   | 1.99E-01 | 5.95E-01 | -0.01 | 1.11E-01 | 4.79E-01 |
| P43121 | Cell surface glycoprotein MUC18                                | MCAM     | 2.45E-04 | 1.86E-03 | -3.74  | 4.66E-02 | 7.31E-02 | 0.36  | 1.80E-01 | 2.24E-01 | -4.20  | 1.02E-01 | 4.54E-01 | 0.26  | 1.54E-01 | 5.17E-01 |
| P00740 | Coagulation factor IX                                          | F9       | 4.14E-04 | 2.85E-03 | 11.84  | 2.56E-04 | 1.40E-03 | -0.95 | 2.28E-02 | 8.33E-02 | -14.56 | 1.06E-03 | 5.59E-02 | 0.72  | 3.45E-02 | 4.59E-01 |
| P06312 | Ig kappa chain V-IV region (Fragment)                          | IGKV4-1  | 2.61E-04 | 1.94E-03 | 19.67  | 7.48E-03 | 2.02E-02 | -1.38 | 1.49E-01 | 2.05E-01 | 8.57   | 4.01E-01 | 7.52E-01 | -0.74 | 3.02E-01 | 6.27E-01 |
| O43707 | Alpha-actinin-4                                                | ACTN4    | 1.07E-03 | 5.75E-03 | -1.23  | 2.70E-04 | 1.46E-03 | 0.13  | 1.13E-02 | 6.76E-02 | 0.72   | 1.31E-01 | 5.04E-01 | -0.04 | 2.07E-01 | 5.91E-01 |
| P12111 | <b>Collagen alpha-3(VI)</b>                                    | COL6A3   | 9.82E-04 | 5.56E-03 | 1.13   | 2.94E-04 | 1.56E-03 | -0.06 | 1.40E-01 | 1.96E-01 | -0.59  | 1.81E-01 | 5.91E-01 | 0.02  | 5.79E-01 | 7.20E-01 |
| P18206 | Vinculin                                                       | VCL      | 1.06E-03 | 5.75E-03 | -2.28  | 3.29E-04 | 1.72E-03 | 0.26  | 7.85E-03 | 6.53E-02 | 1.16   | 1.93E-01 | 5.95E-01 | -0.08 | 2.03E-01 | 5.91E-01 |
| P30613 | Pyruvate kinase PKLR                                           | PKLR     | 1.28E-03 | 6.69E-03 | 65.77  | 6.80E-03 | 1.86E-02 | -4.71 | 1.37E-01 | 1.95E-01 | -      | 3.82E-04 | 4.07E-02 | 5.58  | 3.84E-02 | 4.59E-01 |
| Q96HC4 | PDZ and LIM domain protein 5                                   | PDLIM5   | 4.20E-04 | 2.85E-03 | -6.65  | 1.05E-02 | 2.58E-02 | 1.22  | 6.69E-03 | 6.19E-02 | -3.13  | 3.84E-01 | 7.52E-01 | 0.11  | 6.43E-01 | 7.34E-01 |
| P37837 | Transaldolase                                                  | TALDO1   | 8.79E-04 | 5.05E-03 | 43.34  | 4.24E-04 | 2.19E-03 | -2.18 | 9.85E-02 | 1.66E-01 | -51.49 | 2.34E-03 | 7.80E-02 | 0.58  | 6.33E-01 | 7.33E-01 |
| P01834 | Ig kappa chain C region                                        | IGKC     | 4.33E-04 | 2.85E-03 | 3.37   | 4.14E-03 | 1.27E-02 | -0.22 | 1.33E-01 | 1.91E-01 | 0.75   | 6.48E-01 | 8.31E-01 | -0.12 | 3.17E-01 | 6.29E-01 |
| Q06828 | Fibromodulin                                                   | FMOD     | 5.13E-04 | 3.32E-03 | -5.23  | 3.45E-02 | 5.84E-02 | 0.76  | 5.50E-02 | 1.26E-01 | -4.56  | 1.80E-01 | 5.91E-01 | 0.20  | 4.03E-01 | 6.60E-01 |
| P31146 | <b>Coronin-1A</b>                                              | CORO1A   | 2.53E-03 | 1.24E-02 | 15.69  | 5.55E-04 | 2.82E-03 | -1.05 | 3.97E-02 | 1.07E-01 | -13.97 | 2.70E-02 | 3.02E-01 | 0.49  | 2.78E-01 | 6.12E-01 |
| O43294 | Transforming growth factor beta-1-induced transcript 1 protein | TGFB111  | 2.70E-03 | 1.31E-02 | -5.48  | 5.90E-04 | 2.95E-03 | 0.44  | 5.06E-02 | 1.21E-01 | 3.81   | 8.70E-02 | 4.31E-01 | -0.24 | 1.31E-01 | 5.04E-01 |
| P39060 | Collagen alpha-1(XVIII) chain                                  | COL18A1  | 2.07E-03 | 1.04E-02 | -5.45  | 6.30E-04 | 3.11E-03 | 0.57  | 2.90E-02 | 9.09E-02 | 2.82   | 2.07E-01 | 5.96E-01 | -0.04 | 8.12E-01 | 7.83E-01 |
| P06727 | Apolipoprotein A-IV                                            | APOA4    | 3.01E-03 | 1.41E-02 | 7.40   | 6.61E-04 | 3.21E-03 | -0.91 | 1.15E-02 | 6.76E-02 | -5.19  | 8.72E-02 | 4.31E-01 | 0.16  | 4.52E-01 | 6.79E-01 |
| P63244 | Guanine nucleotide-                                            | GNB2L1   | 2.88E-03 | 1.36E-02 | 28.04  | 6.73E-04 | 3.22E-03 | -2.07 | 6.95E-02 | 1.39E-01 | -26.09 | 2.26E-02 | 3.02E-01 | 0.73  | 3.67E-01 | 6.54E-01 |
| Q9Y490 | Talin-1                                                        | TLN1     | 1.88E-03 | 9.58E-03 | -1.45  | 7.12E-04 | 3.36E-03 | 0.21  | 3.45E-03 | 4.29E-02 | 0.65   | 2.82E-01 | 6.69E-01 | -0.08 | 5.45E-02 | 4.70E-01 |
| P05156 | Complement factor I                                            | CFI      | 7.24E-04 | 4.48E-03 | 17.78  | 1.42E-03 | 5.95E-03 | -0.77 | 2.59E-01 | 2.63E-01 | -1.56  | 8.41E-01 | 8.58E-01 | -0.30 | 5.86E-01 | 7.20E-01 |
| P00488 | <b>Coagulation factor XIII A chain</b>                         | F13A1    | 3.57E-03 | 1.63E-02 | 9.72   | 7.67E-04 | 3.58E-03 | -0.72 | 2.81E-02 | 8.97E-02 | -8.01  | 4.64E-02 | 3.47E-01 | 0.54  | 8.38E-02 | 4.70E-01 |
| P01620 | Ig kappa chain V-III region S1E                                | IGKV3-20 | 8.15E-04 | 4.89E-03 | 12.69  | 4.33E-03 | 1.31E-02 | -0.53 | 3.02E-01 | 2.86E-01 | 1.84   | 7.67E-01 | 8.46E-01 | -0.18 | 6.69E-01 | 7.44E-01 |
| P00736 | <b>Complement C1r subcomponent</b>                             | C1R      | 3.35E-03 | 1.55E-02 | 11.46  | 8.30E-04 | 3.82E-03 | -0.78 | 8.33E-02 | 1.57E-01 | -7.05  | 1.41E-01 | 5.28E-01 | 0.03  | 9.23E-01 | 8.06E-01 |
| Q08431 | Lactadherin                                                    | MFGE8    | 8.32E-04 | 4.92E-03 | -3.70  | 3.63E-03 | 1.20E-02 | 0.43  | 2.02E-02 | 8.04E-02 | -0.37  | 8.36E-01 | 8.58E-01 | -0.01 | 9.32E-01 | 8.06E-01 |
| P59665 | Neutrophil defensin 1                                          | DEFA1    | 1.00E-03 | 5.60E-03 | 28.10  | 9.28E-04 | 4.21E-03 | -3.00 | 1.24E-02 | 7.05E-02 | -6.59  | 5.80E-01 | 8.16E-01 | -0.02 | 9.83E-01 | 8.08E-01 |
| Q14112 | Nidogen-2                                                      | NID2     | 4.44E-03 | 1.94E-02 | 28.59  | 1.04E-03 | 4.66E-03 | -3.01 | 5.49E-03 | 5.45E-02 | -26.02 | 3.14E-02 | 3.10E-01 | 1.73  | 5.85E-02 | 4.70E-01 |
| P50895 | <b>Basal cell adhesion molecule</b>                            | BCAM     | 1.05E-03 | 5.75E-03 | -5.67  | 1.99E-03 | 7.62E-03 | 0.51  | 4.69E-02 | 1.19E-01 | 0.41   | 8.72E-01 | 8.64E-01 | -0.01 | 9.38E-01 | 8.06E-01 |
| Q96PD5 | N-acetylmuramoyl-L-alanine amidase                             | PGLYRP2  | 2.77E-03 | 1.33E-02 | 13.60  | 1.09E-03 | 4.83E-03 | -1.19 | 2.75E-02 | 8.97E-02 | -5.84  | 3.16E-01 | 7.06E-01 | 0.12  | 7.72E-01 | 7.67E-01 |
| P12109 | Collagen alpha-1(VI) chain                                     | COL6A1   | 4.92E-03 | 2.13E-02 | 2.64   | 1.14E-03 | 4.96E-03 | -0.21 | 7.63E-02 | 1.48E-01 | -1.81  | 1.10E-01 | 4.70E-01 | 0.09  | 2.66E-01 | 6.04E-01 |
| Q99497 | Protein deglycase DJ-1                                         | PARK7    | 2.55E-02 | 6.17E-02 | -9.80  | 6.84E-03 | 1.86E-02 | 2.08  | 1.29E-03 | 3.05E-02 | 8.74   | 8.05E-02 | 4.21E-01 | -0.70 | 5.58E-02 | 4.70E-01 |
| P05062 | Fructose-bisphosphate aldolase B                               | ALDOB    | 2.26E-02 | 5.85E-02 | -7.17  | 8.01E-03 | 2.12E-02 | 1.50  | 1.30E-03 | 3.05E-02 | 7.92   | 3.29E-02 | 3.10E-01 | -0.49 | 7.12E-02 | 4.70E-01 |
| Q9BXR6 | Complement factor H-related protein 5                          | CFHR5    | 5.32E-03 | 2.23E-02 | 28.81  | 1.31E-03 | 5.66E-03 | -1.34 | 2.10E-01 | 2.38E-01 | -18.32 | 1.43E-01 | 5.30E-01 | 0.06  | 9.48E-01 | 8.08E-01 |
| Q13361 | Microfibrillar-associated protein 5                            | MFAP5    | 6.17E-03 | 2.45E-02 | 33.64  | 1.41E-03 | 5.95E-03 | -2.13 | 1.08E-01 | 1.72E-01 | -28.59 | 5.05E-02 | 3.51E-01 | -0.71 | 4.89E-01 | 6.91E-01 |
| P46952 | 3-hydroxyanthranilate 3,4-dioxygenase                          | HAAO     | 3.23E-02 | 7.13E-02 | -14.05 | 8.90E-03 | 2.23E-02 | 5.09  | 1.42E-03 | 3.05E-02 | 12.53  | 9.08E-02 | 4.31E-01 | -0.84 | 1.12E-01 | 4.80E-01 |
| P08758 | Annexin A5                                                     | ANXA5    | 5.21E-03 | 2.20E-02 | -6.24  | 1.46E-03 | 6.07E-03 | 0.94  | 6.86E-03 | 6.19E-02 | 3.50   | 2.01E-01 | 5.95E-01 | -0.33 | 9.23E-02 | 4.70E-01 |
| Q13418 | Integrin-linked protein kinase                                 | ILK      | 1.68E-03 | 8.65E-03 | -7.10  | 1.48E-03 | 6.07E-03 | 0.87  | 8.57E-03 | 6.76E-02 | 1.61   | 6.06E-01 | 8.16E-01 | -0.01 | 9.75E-01 | 8.08E-01 |
| P21291 | Cysteine and glycine-rich protein 1                            | CSRP1    | 6.65E-03 | 2.57E-02 | -6.17  | 1.55E-03 | 6.27E-03 | 0.83  | 1.20E-02 | 6.92E-02 | 4.34   | 1.10E-01 | 4.70E-01 | -0.29 | 1.33E-01 | 5.04E-01 |
| P10909 | Clusterin                                                      | CLU      | 6.62E-03 | 2.57E-02 | 6.63   | 1.70E-03 | 6.81E-03 | -0.35 | 1.94E-01 | 2.32E-01 | -6.35  | 2.97E-02 | 3.10E-01 | 0.32  | 1.37E-01 | 5.04E-01 |
| P00738 | Haptoglobin                                                    | HP       | 4.41E-03 | 1.94E-02 | 1.15   | 1.82E-03 | 7.20E-03 | -0.07 | 8.10E-02 | 1.54E-01 | -0.47  | 3.59E-01 | 7.32E-01 | 0.05  | 2.05E-01 | 5.91E-01 |
| Q92747 | Actin-related protein 2/3 complex subunit 1A                   | ARPC1A   | 8.33E-03 | 2.93E-02 | -85.33 | 1.92E-03 | 7.50E-03 | 13.45 | 4.31E-03 | 4.57E-02 | 66.51  | 8.16E-02 | 4.21E-01 | -1.70 | 5.24E-01 | 6.95E-01 |
| P51884 | Lumican                                                        | LUM      | 8.38E-03 | 2.93E-02 | 6.76   | 1.98E-03 | 7.62E-03 | -0.71 | 1.78E-02 | 8.03E-02 | -4.82  | 1.13E-01 | 4.73E-01 | 0.15  | 4.72E-01 | 6.89E-01 |

**Supplemental Table 12. Up-Regulated Proteins in LAD Fibrous Plaque Samples (n=15) Compared with Normal LAD Samples (n=30).** Samples were selected using patho-proteomic phenotyping designed to integrate pathologist assessment of extent of disease and CAM deconvolution of global protein profiles (fold-change = mean FP/ mean NL).

| Uniprot ID | Protein                                                    | Gene     | Fold change | q-value  |
|------------|------------------------------------------------------------|----------|-------------|----------|
| P24821     | Tenascin                                                   | TNC      | 13.04       | 1.08E-03 |
| P07996     | Thrombospondin-1                                           | THBS1    | 10.05       | 2.06E-03 |
| P13796     | Plastin-2                                                  | LCP1     | 3.87        | 9.80E-04 |
| P04114     | Apolipoprotein B-100                                       | APOB     | 3.65        | 6.26E-04 |
| P07858     | Cathepsin B                                                | CTSB     | 3.63        | 3.13E-04 |
| P40121     | Macrophage-capping protein                                 | CAPG     | 2.72        | 6.89E-03 |
| P35442     | Thrombospondin-2                                           | THBS2    | 2.69        | 4.40E-04 |
| P13760     | HLA class II histocompatibility antigen, DRB1-4 beta chain | HLA-DRB1 | 2.57        | 1.02E-02 |
| P05783     | Keratin, type I cytoskeletal 18                            | KRT18    | 2.55        | 4.20E-02 |
| P27169     | Serum paraoxonase/arylesterase 1                           | PON1     | 2.21        | 3.75E-02 |
| Q9UBR2     | Cathepsin Z                                                | CTSZ     | 2.20        | 9.53E-04 |
| P01871     | Ig mu chain C region                                       | IGHM     | 2.15        | 8.14E-03 |
| P31146     | Coronin-1A                                                 | CORO1A   | 2.13        | 1.22E-02 |
| O43866     | CD5 antigen-like                                           | CD5L     | 2.10        | 1.22E-02 |
| P08519     | Apolipoprotein(a)                                          | LPA      | 1.97        | 1.08E-02 |
| Q15063     | Periostin                                                  | POSTN    | 1.94        | 5.47E-04 |
| P01031     | Complement C5                                              | C5       | 1.89        | 1.58E-02 |
| Q15582     | Transforming growth factor-beta-induced protein ig-h3      | TGFBI    | 1.86        | 2.41E-03 |
| P02649     | Apolipoprotein E                                           | APOE     | 1.79        | 1.28E-02 |
| P40261     | Nicotinamide N-methyltransferase                           | NNMT     | 1.74        | 1.08E-02 |
| Q8IUX7     | Adipocyte enhancer-binding protein 1                       | AEBP1    | 1.71        | 4.77E-03 |



**Supplemental Table 13. Down-Regulated Proteins in LAD Fibrous Plaque Samples (n=15) Compared with Normal LAD Samples (n=30).** Samples were selected using patho-proteomic phenotyping designed to integrate pathologist assessment of extent of disease and CAM deconvolution of global protein profiles. (For down regulated proteins Fold-change = -1\* mean NL/mean FP.)

| Uniprot ID | Protein                                                        | Gene    | Fold-change | q-value  |
|------------|----------------------------------------------------------------|---------|-------------|----------|
| P07197     | Neurofilament medium polypeptide                               | NEFM    | -5.70       | 3.42E-02 |
| P49327     | Fatty acid synthase                                            | FASN    | -5.40       | 1.55E-05 |
| P15090     | Fatty acid-binding protein, adipocyte                          | FABP4   | -3.58       | 6.87E-03 |
| P07196     | Neurofilament light polypeptide                                | NEFL    | -3.27       | 2.45E-02 |
| Q96Q06     | Perilipin-4                                                    | PLIN4   | -2.53       | 2.90E-04 |
| P09543     | 2',3'-cyclic-nucleotide 3'-phosphodiesterase                   | CNP     | -2.50       | 2.77E-04 |
| P33121     | Long-chain-fatty-acid--CoAligase 1                             | ACSL1   | -2.41       | 4.90E-04 |
| P11586     | C-1-tetrahydrofolate synthase, cytoplasmic                     | MTHFD1  | -2.28       | 1.55E-05 |
| O60240     | Perilipin-1                                                    | PLIN1   | -2.24       | 3.13E-04 |
| P22695     | Cytochrome b-c1 complex subunit 2, mitochondrial               | UQCRC2  | -2.19       | 3.13E-04 |
| P23634     | Plasma membrane calcium-transporting ATPase 4                  | ATP2B4  | -2.18       | 2.77E-04 |
| Q68CZ2     | Tensin-3                                                       | TNS3    | -2.17       | 2.22E-03 |
| Q05469     | Hormone-sensitive lipase                                       | LIPE    | -2.16       | 1.36E-03 |
| O43301     | Heat shock 70 kDa protein 12A                                  | HSPA12A | -2.13       | 4.90E-04 |
| Q86TX2     | Acyl-coenzyme A thioesterase 1                                 | ACOT1   | -2.11       | 9.01E-04 |
| Q16363     | Laminin subunit alpha-4                                        | LAMA4   | -2.10       | 4.90E-04 |
| O43175     | D-3-phosphoglycerate dehydrogenase                             | PHGDH   | -2.09       | 2.77E-04 |
| Q16698     | 2,4-dienoyl-CoA reductase, mitochondrial                       | DECR1   | -2.08       | 5.47E-04 |
| P11532     | Dystrophin                                                     | DMD     | -2.07       | 5.47E-04 |
| P16930     | Fumarylacetoacetase                                            | FAH     | -2.05       | 9.53E-04 |
| Q02952     | A-kinase anchor protein 12                                     | AKAP12  | -2.03       | 3.13E-04 |
| Q9UN36     | Protein NDRG2                                                  | NDRG2   | -2.02       | 2.06E-03 |
| Q9HBL0     | Tensin-1                                                       | TNS1    | -2.01       | 5.58E-04 |
| P21695     | Glycerol-3-phosphate dehydrogenase [NAD(+)], cytoplasmic       | GPD1    | -1.99       | 1.96E-04 |
| Q9BSJ8     | Extended synaptotagmin-1                                       | ESYT1   | -1.98       | 1.07E-03 |
| O75112     | LIM domain-binding protein 3                                   | LDB3    | -1.98       | 1.70E-02 |
| P49748     | Very long-chain specific acyl-CoA dehydrogenase, mitochondrial | ACADVL  | -1.96       | 4.41E-04 |
| P53396     | ATP-citrate synthase                                           | ACLY    | -1.95       | 2.06E-03 |
| O95810     | Serum deprivation-response protein                             | SDPR    | -1.95       | 5.67E-04 |
| P48163     | NADP-dependent malic enzyme                                    | ME1     | -1.95       | 3.46E-03 |
| P31323     | cAMP-dependent protein kinase type II-beta regulatory subunit  | PRKAR2B | -1.94       | 2.05E-02 |
| Q99685     | Monoglyceride lipase                                           | MGLL    | -1.94       | 1.55E-03 |
| Q13683     | Integrin alpha-7                                               | ITGA7   | -1.90       | 3.46E-03 |
| Q2UY09     | Collagen alpha-1(XXVIII) chain                                 | COL28A1 | -1.90       | 1.92E-03 |
| P46821     | Microtubule-associated protein 1B                              | MAP1B   | -1.90       | 4.59E-03 |
| Q96JY6     | PDZ and LIM domain protein 2                                   | PDLIM2  | -1.89       | 3.61E-03 |
| O75390     | Citrate synthase, mitochondrial                                | CS      | -1.88       | 1.88E-03 |
| P13804     | Electron transfer flavoprotein subunit alpha, mitochondrial    | ETFA    | -1.87       | 2.77E-04 |
| P21397     | Amine oxidase [flavin-containing] A                            | MAOA    | -1.87       | 5.24E-04 |
| Q6YN16     | Hydroxysteroid dehydrogenase-like protein 2                    | HSDL2   | -1.86       | 5.47E-04 |

|        |                                                                 |         |       |          |
|--------|-----------------------------------------------------------------|---------|-------|----------|
| P31930 | Cytochrome b-c1 complex subunit 1, mitochondrial                | UQCRC1  | -1.86 | 1.10E-03 |
| P23141 | Liver carboxylesterase 1                                        | CES1    | -1.86 | 9.39E-03 |
| Q9BTV4 | Transmembrane protein 43                                        | TMEM43  | -1.84 | 1.08E-03 |
| Q15836 | Vesicle-associated membrane protein 3                           | VAMP3   | -1.82 | 1.86E-03 |
| Q14112 | Nidogen-2                                                       | NID2    | -1.81 | 5.47E-04 |
| Q13011 | Delta(3,5)-Delta(2,4)-dienoyl-CoA isomerase, mitochondrial      | ECH1    | -1.81 | 4.59E-03 |
| Q99798 | Aconitate hydratase, mitochondrial                              | ACO2    | -1.80 | 1.96E-04 |
| P09622 | Dihydrolipoyl dehydrogenase, mitochondrial                      | DLD     | -1.80 | 3.88E-04 |
| P11177 | Pyruvate dehydrogenase E1 component subunit beta, mitochondrial | PDHB    | -1.80 | 1.08E-03 |
| P14854 | Cytochrome c oxidase subunit 6B1                                | COX6B1  | -1.79 | 6.94E-04 |
| Q96AM1 | Mas-related G-protein coupled receptor member F                 | MRGPRF  | -1.79 | 7.86E-03 |
| P17540 | Creatine kinase S-type, mitochondrial                           | CKMT2   | -1.79 | 4.43E-02 |
| P35611 | Alpha-adducin                                                   | ADD1    | -1.78 | 2.15E-03 |
| P07451 | Carbonic anhydrase 3                                            | CA3     | -1.78 | 1.08E-02 |
| P27816 | Microtubule-associated protein 4                                | MAP4    | -1.78 | 1.28E-02 |
| P06737 | Glycogen phosphorylase, liver form                              | PYGL    | -1.78 | 2.34E-02 |
| Q02218 | 2-oxoglutarate dehydrogenase, mitochondrial                     | OGDH    | -1.77 | 1.24E-02 |
| P07099 | Epoxide hydrolase 1                                             | EPHX1   | -1.77 | 4.10E-02 |
| Q9UHD8 | Septin-9                                                        | SEP9    | -1.76 | 1.68E-03 |
| P50213 | Isocitrate dehydrogenase [NAD] subunit alpha, mitochondrial     | IDH3A   | -1.74 | 5.06E-03 |
| P10620 | Microsomal glutathione S-transferase 1                          | MGST1   | -1.73 | 2.06E-03 |
| Q16891 | MICOS complex subunit MIC60                                     | IMMT    | -1.72 | 2.88E-03 |
| P51911 | Calponin-1                                                      | CNN1    | -1.71 | 1.88E-03 |
| Q6PCB0 | von Willebrand factor A domain-containing protein 1             | VWA1    | -1.71 | 1.70E-02 |
| P21399 | Cytoplasmic aconitate hydratase                                 | ACO1    | -1.71 | 7.94E-03 |
| P30084 | Enoyl-CoA hydratase, mitochondrial                              | ECHS1   | -1.71 | 1.36E-03 |
| Q01082 | Spectrin beta chain, non-erythrocytic 1                         | SPTBN1  | -1.71 | 5.24E-04 |
| O43491 | Band 4.1-like protein 2                                         | EPB41L2 | -1.71 | 7.31E-03 |

**Supplemental Table 14. Predicted Upstream Master Regulators for Up- and Down-Regulated Fibrous Plaque Proteins**

**A. LAD Samples**

*Overrepresented Pathways with Consistent Evidence of Activation or Inhibition*

| Upstream Regulator | Molecule Type                     | p-value of overlap | Predicted Activation | Activation z-score |
|--------------------|-----------------------------------|--------------------|----------------------|--------------------|
| INSR               | kinase                            | 8.56E-16           | Inhibited            | -2.493             |
| PPARG              | ligand-dependent nuclear receptor | 2.42E-13           | Inhibited            | -2.805             |
| PPARA              | ligand-dependent nuclear receptor | 4.22E-10           | Inhibited            | -3.060             |
| <b>TNF</b>         | cytokine                          | 2.64E-07           | Activated            | 3.043              |

*Overrepresented Pathways without Consistent Evidence of Activation or Inhibition*

| Upstream Regulator | Molecule Type                     | p-value of overlap | Predicted Activation | Activation z-score |
|--------------------|-----------------------------------|--------------------|----------------------|--------------------|
| <b>TP53</b>        | transcription regulator           | 5.60E-08           | n/a                  | -0.723             |
| <b>MGEA5</b>       | enzyme                            | 2.40E-06           | n/a                  | 0.302              |
| PTEN               | phosphatase                       | 2.48E-06           | n/a                  | -0.950             |
| ESR2               | ligand-dependent nuclear receptor | 1.61E-05           | n/a                  | -0.239             |
| <b>MYC</b>         | transcription regulator           | 2.34E-04           | n/a                  | 0.000              |
| <b>ERBB2</b>       | kinase                            | 4.20E-04           | n/a                  | n/a*               |
| <b>TGFB1</b>       | growth factor                     | 1.79E-03           | n/a                  | 0.720              |

\* not enough information in the Ingenuity database to estimate

**B. AA Samples**

*Overrepresented Pathways with Consistent Evidence of Activation or Inhibition*

| Upstream Regulator | Molecule Type | p-value of overlap | Predicted Activation | Activation z-score |
|--------------------|---------------|--------------------|----------------------|--------------------|
| <b>TGFB1</b>       | growth factor | 8.53E-11           | Inhibited            | -3.147             |
| APOE               | transporter   | 4.53E-09           | Inhibited            | -2.611             |
| APP                | other         | 2.76E-06           | Activated            | 2.148              |
| <b>TNF</b>         | cytokine      | 1.92E-05           | Activated            | 2.192              |
| IL1B               | cytokine      | 2.31E-05           | Activated            | 2.676              |
| <b>MGEA5</b>       | enzyme        | 9.02E-04           | Activated            | 2.714              |
| IL6                | cytokine      | 1.05E-03           | Activated            | 2.195              |

*Overrepresented Pathways without Consistent Evidence of Activation or Inhibition*

| Upstream Regulator | Molecule Type           | p-value of overlap | Predicted Activation | Activation z-score |
|--------------------|-------------------------|--------------------|----------------------|--------------------|
| <b>TP53</b>        | transcription regulator | 5.16E-11           | n/a                  | -1.918             |
| HRAS               | enzyme                  | 7.29E-11           | n/a                  | 0.617              |
| <b>MYC</b>         | transcription regulator | 8.34E-08           | n/a                  | -0.650             |
| MYCN               | transcription regulator | 3.17E-07           | n/a                  | 1.612              |

|              |                          |          |     |        |
|--------------|--------------------------|----------|-----|--------|
| PRL          | cytokine                 | 1.02E-05 | n/a | 0.818  |
| JUN          | transcription regulator  | 2.60E-05 | n/a | 0.859  |
|              | ligand-dependent nuclear |          |     |        |
| AR           | receptor                 | 5.86E-05 | n/a | -0.816 |
| MAPK1        | kinase                   | 7.29E-05 | n/a | 0.000  |
| KRAS         | enzyme                   | 7.39E-05 | n/a | -0.043 |
| NFKBIA       | transcription regulator  | 2.55E-04 | n/a | 1.310  |
| HTT          | transcription regulator  | 4.65E-04 | n/a | 0.447  |
|              | ligand-dependent nuclear |          |     |        |
| ESR1         | receptor                 | 1.03E-03 | n/a | 0.905  |
| SP1          | transcription regulator  | 1.84E-03 | n/a | 0.342  |
| <b>ERBB2</b> | kinase                   | 3.98E-03 | n/a | -1.154 |
| SMARCA4      | transcription regulator  | 4.67E-03 | n/a | -1.949 |
| STAT3        | transcription regulator  | 6.15E-03 | n/a | 1.680  |
| FOS          | transcription regulator  | 1.22E-02 | n/a | -1.069 |
| CTNNB1       | transcription regulator  | 1.32E-02 | n/a | 0.000  |

Up-stream regulators common to both territories are indicated in **bold**

**Supplemental Table 15.** IPA Output for Analysis of Fibrous Plaque vs NL Marker Proteins with q-value  $\leq 0.05$  and |fold change|  $\geq 1.7$

**<see Excel file: Supplemental Table 15.xlsx>**

**Supplemental Table 16. Up-Regulated Proteins in Fibrous Plaque Enriched AA Samples (n=7)**

**Compared with Normal AA Samples (n=15).** Samples were selected using patho-proteomic phenotyping designed to integrate pathologist assessment of extent of disease and CAM deconvolution of global protein profiles (fold-change = mean FP/ mean NL).

| <u>Uniprot</u> |                                                         |             | <u>Fold-</u>  |                |
|----------------|---------------------------------------------------------|-------------|---------------|----------------|
| <u>ID</u>      | <u>Protein</u>                                          | <u>Gene</u> | <u>change</u> | <u>q-value</u> |
| P04114         | Apolipoprotein B-100                                    | APOB        | 11.68         | 4.87E-03       |
| P13796         | Plastin-2                                               | LCP1        | 9.22          | 4.50E-04       |
| P02675         | Fibrinogen beta chain                                   | FGB         | 6.03          | 1.73E-03       |
| P07858         | Cathepsin B                                             | CTSB        | 5.99          | 4.84E-03       |
| P00734         | Prothrombin                                             | F2          | 5.30          | 5.92E-04       |
| P00738         | Haptoglobin                                             | HP          | 4.26          | 1.36E-03       |
| P01892         | HLA class I histocompatibility antigen, A-2 alpha chain | HLA-A       | 4.16          | 4.73E-03       |
| P20742         | Pregnancy zone protein                                  | PZP         | 4.04          | 3.90E-02       |
| P27169         | Serum paraoxonase/arylesterase 1                        | PON1        | 4.04          | 3.42E-02       |
| P19823         | Inter-alpha-trypsin inhibitor heavy chain H2            | ITIH2       | 4.00          | 7.61E-04       |
| P40121         | Macrophage-capping protein                              | CAPG        | 3.88          | 1.09E-02       |
| P35442         | Thrombospondin-2                                        | THBS2       | 3.82          | 1.36E-03       |
| P00488         | Coagulation factor XIII A chain                         | F13A1       | 3.77          | 5.86E-03       |
| P01031         | Complement C5                                           | C5          | 3.64          | 5.07E-03       |
| P02679         | Fibrinogen gamma chain                                  | FGG         | 3.53          | 3.90E-03       |
| P04003         | C4b-binding protein alpha chain                         | C4BPA       | 3.45          | 1.24E-03       |
| P00739         | Haptoglobin-related protein                             | HPR         | 3.41          | 5.26E-03       |
| P31146         | Coronin-1A                                              | CORO1A      | 3.30          | 3.13E-05       |
| P05090         | Apolipoprotein D                                        | APOD        | 3.29          | 2.90E-04       |
| P24821         | Tenascin                                                | TNC         | 3.17          | 2.70E-03       |
| P05546         | Heparin cofactor 2                                      | SERPIND1    | 3.12          | 1.03E-02       |
| P02649         | Apolipoprotein E                                        | APOE        | 3.06          | 2.06E-04       |
| Q14624         | Inter-alpha-trypsin inhibitor heavy chain H4            | ITIH4       | 3.04          | 3.70E-04       |
| P02671         | Fibrinogen alpha chain                                  | FGA         | 3.03          | 1.26E-03       |
| P52209         | 6-phosphogluconate dehydrogenase, decarboxylating       | PGD         | 2.99          | 4.57E-02       |
| P05155         | Plasma protease C1 inhibitor                            | SERPING1    | 2.85          | 1.08E-04       |
| P00747         | Plasminogen                                             | PLG         | 2.73          | 4.08E-04       |
| POCOL5         | Complement C4-B                                         | C4B         | 2.72          | 3.13E-05       |
| Q9BXR6         | Complement factor H-related protein 5                   | CFHR5       | 2.64          | 2.00E-02       |
| O43866         | CD5 antigen-like                                        | CD5L        | 2.63          | 1.62E-02       |
| O14791         | Apolipoprotein L1                                       | APOL1       | 2.58          | 3.29E-02       |
| P00736         | Complement C1r subcomponent                             | C1R         | 2.56          | 3.13E-02       |
| P02792         | Ferritin light chain                                    | FTL         | 2.54          | 4.01E-04       |
| Q9UBR2         | Cathepsin Z                                             | CTSZ        | 2.51          | 1.40E-02       |
| P19827         | Inter-alpha-trypsin inhibitor heavy chain H1            | ITIH1       | 2.50          | 1.95E-05       |
| P18428         | Lipopolysaccharide-binding protein                      | LBP         | 2.48          | 1.02E-04       |
| P01871         | Ig mu chain C region                                    | IGHM        | 2.43          | 2.07E-02       |
| P04196         | Histidine-rich glycoprotein                             | HRG         | 2.41          | 1.52E-06       |
| P20700         | Lamin-B1                                                | LMNB1       | 2.40          | 1.62E-02       |
| P04179         | Superoxide dismutase [Mn], mitochondrial                | SOD2        | 2.36          | 1.04E-03       |
| P61626         | Lysozyme C                                              | LYZ         | 2.31          | 1.72E-02       |
| P02794         | Ferritin heavy chain                                    | FTH1        | 2.21          | 5.16E-04       |
| Q96PD5         | N-acetylmuramoyl-L-alanine amidase                      | PGLYRP2     | 2.16          | 1.40E-02       |

|        |                                    |       |      |          |
|--------|------------------------------------|-------|------|----------|
| P07358 | Complement component C8 beta chain | C8B   | 2.15 | 3.93E-02 |
| P01023 | Alpha-2-macroglobulin              | A2M   | 2.11 | 8.38E-04 |
| P07339 | Cathepsin D                        | CTSD  | 2.05 | 4.12E-03 |
| P59665 | Neutrophil defensin 1              | DEFA1 | 2.04 | 1.75E-02 |
| P01877 | Ig alpha-2 chain C region          | IGHA2 | 2.02 | 2.90E-03 |
| P05156 | Complement factor I                | CFI   | 1.98 | 8.48E-03 |
| P08603 | Complement factor H                | CFH   | 1.98 | 6.41E-06 |
| Q14764 | Major vault protein                | MVP   | 1.97 | 2.54E-02 |
| P00740 | Coagulation factor IX              | F9    | 1.88 | 1.16E-02 |
| P00751 | Complement factor B                | CFB   | 1.85 | 1.94E-02 |
| P13671 | Complement component C6            | C6    | 1.85 | 7.56E-03 |
| P01594 | Ig kappa chain V-I region AU       |       | 1.84 | 4.49E-02 |
| P00450 | Ceruloplasmin                      | CP    | 1.83 | 7.34E-05 |
| P10643 | Complement component C7            | C7    | 1.82 | 1.97E-03 |
| P04004 | Vitronectin                        | VTN   | 1.81 | 9.08E-04 |
| Q9UJ70 | N-acetyl-D-glucosamine kinase      | NAGK  | 1.80 | 3.61E-02 |
| O14818 | Proteasome subunit alpha type-7    | PSMA7 | 1.79 | 1.75E-02 |
| P01042 | Kininogen-1                        | KNG1  | 1.79 | 1.84E-03 |

**Supplemental Table 17. Down-Regulated Proteins in Fibrous Plaque Enriched AA Samples (n=7) Compared with Normal AA Samples (n=15).** Samples were selected using patho-proteomic phenotyping designed to integrate pathologist assessment of extent of disease and CAM deconvolution of global protein profiles. (For down regulated proteins Fold-change = -1\* mean NL/mean FP)

| <u>Uniprot ID</u> | <u>Protein</u>                                                    | <u>Gene</u> | <u>Fold-change</u> | <u>q-value</u> |
|-------------------|-------------------------------------------------------------------|-------------|--------------------|----------------|
| Q8N2S1            | Latent-transforming growth factor beta-binding protein 4          | LTBP4       | -6.38              | 4.00E-07       |
| P55083            | Microfibril-associated glycoprotein 4                             | MFAP4       | -4.92              | 6.64E-05       |
| Q7Z4I7            | LIM and senescent cell antigen-like-containing domain protein 2   | LIMS2       | -4.47              | 5.95E-05       |
| P17661            | Desmin                                                            | DES         | -4.36              | 1.95E-05       |
| P46821            | Microtubule-associated protein 1B                                 | MAP1B       | -4.11              | 4.00E-07       |
| P11216            | Glycogen phosphorylase, brain form                                | PYGB        | -3.74              | 7.51E-07       |
| Q9HBL0            | Tensin-1                                                          | TNS1        | -3.72              | 1.73E-05       |
| Q9H223            | EH domain-containing protein 4                                    | EHD4        | -3.69              | 1.52E-06       |
| Q0ZGT2            | Nexilin                                                           | NEXN        | -3.62              | 5.65E-05       |
| P16112            | Aggrecan core protein                                             | ACAN        | -3.55              | 6.64E-05       |
| Q14315            | Filamin-C                                                         | FLNC        | -3.54              | 7.34E-05       |
| Q53GG5            | PDZ and LIM domain protein 3                                      | PDLIM3      | -3.48              | 1.22E-05       |
| P50895            | Basal cell adhesion molecule                                      | BCAM        | -3.46              | 1.77E-06       |
| O00151            | PDZ and LIM domain protein 1                                      | PDLIM1      | -3.37              | 4.28E-05       |
| O43175            | D-3-phosphoglycerate dehydrogenase                                | PHGDH       | -3.31              | 4.90E-06       |
| O00159            | Unconventional myosin-Ic                                          | MYO1C       | -3.19              | 3.56E-06       |
| P53814            | Smoothelin                                                        | SMTN        | -3.14              | 7.75E-07       |
| P29536            | Leiomodin-1                                                       | LMOD1       | -3.12              | 5.80E-07       |
| Q7Z7G0            | Target of Nesh-SH3                                                | ABI3BP      | -3.05              | 1.55E-04       |
| Q8WX93            | Palladin                                                          | PALLD       | -3.05              | 3.56E-06       |
| P60660            | Myosin light polypeptide 6                                        | MYL6        | -3.03              | 2.64E-04       |
| Q9NR12            | PDZ and LIM domain protein 7                                      | PDLIM7      | -2.98              | 4.12E-05       |
| Q01082            | Spectrin beta chain, non-erythrocytic 1                           | SPTBN1      | -2.86              | 2.07E-04       |
| Q9Y4G6            | Talin-2                                                           | TLN2        | -2.84              | 3.06E-05       |
| Q96A00            | Protein phosphatase 1 regulatory subunit 14A                      | PPP1R14A    | -2.82              | 3.88E-05       |
| Q8IVN8            | Somatomedin-B and thrombospondin type-1 domain-containing protein | SBSPON      | -2.79              | 1.87E-05       |
| Q15746            | Myosin light chain kinase, smooth muscle                          | MYLK        | -2.77              | 5.54E-06       |
| Q9NVD7            | Alpha-parvin                                                      | PARVA       | -2.69              | 5.54E-06       |
| Q9NZU5            | LIM and cysteine-rich domains protein 1                           | LMCD1       | -2.68              | 1.08E-05       |
| Q9UMS6            | Synaptopodin-2                                                    | SYNPO2      | -2.68              | 1.53E-04       |
| P19105            | Myosin regulatory light chain 12A                                 | MYL12A      | -2.57              | 1.95E-05       |
| P17655            | Calpain-2 catalytic subunit                                       | CAPN2       | -2.50              | 1.26E-04       |
| Q96HC4            | PDZ and LIM domain protein 5                                      | PDLIM5      | -2.48              | 5.89E-05       |
| O75112            | LIM domain-binding protein 3                                      | LDB3        | -2.48              | 3.29E-04       |
| Q07954            | Prolow-density lipoprotein receptor-related protein 1             | LRP1        | -2.47              | 9.83E-05       |
| Q9BX66            | Sorbin and SH3 domain-containing protein 1                        | SORBS1      | -2.45              | 4.10E-04       |
| Q9BZQ8            | Protein Niban                                                     | FAM129A     | -2.45              | 3.34E-04       |
| Q15942            | Zyxin                                                             | ZYX         | -2.40              | 8.03E-06       |
| Q9UGI8            | Testin                                                            | TES         | -2.39              | 3.47E-05       |
| O94875            | Sorbin and SH3 domain-containing protein 2                        | SORBS2      | -2.38              | 1.85E-04       |
| O14974            | Protein phosphatase 1 regulatory subunit 12A                      | PPP1R12A    | -2.38              | 2.97E-05       |



|        |                                                                    |         |       |          |
|--------|--------------------------------------------------------------------|---------|-------|----------|
| Q15365 | Poly(rC)-binding protein 1                                         | PCBP1   | -2.37 | 2.20E-04 |
| P09651 | Heterogeneous nuclear ribonucleoprotein A1                         | HNRNPA1 | -2.37 | 6.11E-03 |
| P16615 | Sarcoplasmic/endoplasmic reticulum calcium ATPase 2                | ATP2A2  | -2.36 | 4.13E-04 |
| P48059 | LIM and senescent cell antigen-like-containing domain protein 1    | LIMS1   | -2.33 | 8.29E-04 |
| Q14BN4 | Sarcolemmal membrane-associated protein                            | SLMAP   | -2.30 | 5.89E-05 |
| Q8WUP2 | Filamin-binding LIM protein 1                                      | FBLIM1  | -2.27 | 1.33E-04 |
| P51911 | Calponin-1                                                         | CNN1    | -2.26 | 6.30E-04 |
| Q93052 | Lipoma-preferred partner                                           | LPP     | -2.26 | 9.77E-05 |
| O43294 | Transforming growth factor beta-1-induced transcript 1 protein     | TGFB11  | -2.25 | 6.93E-04 |
| Q14204 | Cytoplasmic dynein 1 heavy chain 1                                 | DYNC1H1 | -2.24 | 1.66E-03 |
| Q05682 | Caldesmon                                                          | CALD1   | -2.24 | 2.94E-04 |
| Q16836 | Hydroxyacyl-coenzyme A dehydrogenase, mitochondrial                | HADH    | -2.22 | 6.78E-04 |
| O15061 | Synemin                                                            | SYNM    | -2.21 | 1.72E-02 |
| Q9BTV4 | Transmembrane protein 43                                           | TMEM43  | -2.21 | 1.16E-03 |
| Q9Y696 | Chloride intracellular channel protein 4                           | CLIC4   | -2.21 | 5.54E-06 |
| P43121 | Cell surface glycoprotein MUC18                                    | MCAM    | -2.18 | 1.28E-05 |
| P09104 | Gamma-enolase                                                      | ENO2    | -2.17 | 3.96E-04 |
| Q13976 | cGMP-dependent protein kinase 1                                    | PRKG1   | -2.16 | 3.88E-04 |
| Q03252 | Lamin-B2                                                           | LMNB2   | -2.15 | 1.03E-02 |
| Q13813 | Spectrin alpha chain, non-erythrocytic 1                           | SPTAN1  | -2.14 | 5.45E-04 |
| Q15019 | Septin-2                                                           | 2-Sep   | -2.11 | 1.58E-03 |
| Q15124 | Phosphoglucomutase-like protein 5                                  | PGM5    | -2.08 | 1.36E-03 |
| Q9UBX5 | Fibulin-5                                                          | FBLN5   | -2.08 | 9.44E-04 |
| P02511 | Alpha-crystallin B chain                                           | CRYAB   | -2.06 | 7.93E-03 |
| O14558 | Heat shock protein beta-6                                          | HSPB6   | -2.05 | 9.05E-05 |
| P13861 | cAMP-dependent protein kinase type II-alpha regulatory subunit     | PRKAR2A | -2.05 | 2.43E-04 |
| P53708 | Integrin alpha-8                                                   | ITGA8   | -2.02 | 1.15E-03 |
| P27816 | Microtubule-associated protein 4                                   | MAP4    | -2.01 | 3.71E-04 |
| O15230 | Laminin subunit alpha-5                                            | LAMA5   | -2.01 | 7.86E-04 |
| P20073 | Annexin A7                                                         | ANXA7   | -2.01 | 4.50E-03 |
| P55268 | Laminin subunit beta-2                                             | LAMB2   | -2.01 | 9.55E-04 |
| Q03135 | Caveolin-1                                                         | CAV1    | -1.98 | 2.33E-03 |
| Q96AC1 | Fermitin family homolog 2                                          | FERMT2  | -1.95 | 6.78E-04 |
| Q01995 | Transgelin                                                         | TAGLN   | -1.95 | 7.34E-05 |
| Q14240 | Eukaryotic initiation factor 4A-II                                 | EIF4A2  | -1.93 | 4.44E-03 |
| P08670 | Vimentin                                                           | VIM     | -1.92 | 3.35E-04 |
| Q92599 | Septin-8                                                           | 8-Sep   | -1.92 | 1.68E-02 |
| Q9NZN4 | EH domain-containing protein 2                                     | EHD2    | -1.92 | 1.66E-03 |
| Q04917 | 14-3-3 protein eta                                                 | YWHAH   | -1.89 | 1.16E-03 |
| Q00577 | Transcriptional activator protein Pur-alpha                        | PURA    | -1.89 | 1.73E-04 |
| Q9UBI6 | Guanine nucleotide-binding protein G(I)/G(S)/G(O) subunit gamma-12 | GNG12   | -1.88 | 2.96E-03 |
| Q13555 | Calcium/calmodulin-dependent protein kinase type II subunit gamma  | CAMK2G  | -1.88 | 5.82E-03 |
| P30084 | Enoyl-CoA hydratase, mitochondrial                                 | ECHS1   | -1.87 | 2.10E-02 |
| Q08257 | Quinone oxidoreductase                                             | CRYZ    | -1.87 | 7.25E-04 |
| Q16555 | Dihydropyrimidinase-related protein 2                              | DPYSL2  | -1.86 | 7.75E-07 |
| Q96S97 | Myeloid-associated differentiation marker                          | MYADM   | -1.85 | 1.68E-04 |
| Q16181 | Septin-7                                                           | 7-Sep   | -1.85 | 5.25E-03 |
| Q9H4M9 | EH domain-containing protein 1                                     | EHD1    | -1.84 | 1.71E-03 |
| Q8WUM4 | Programmed cell death 6-interacting                                | PDCD6IP | -1.84 | 9.46E-03 |

|        |                                                                     |         |       |          |
|--------|---------------------------------------------------------------------|---------|-------|----------|
|        | protein                                                             |         |       |          |
| Q15847 | Adipogenesis regulatory factor                                      | ADIRF   | -1.84 | 8.01E-03 |
| P11047 | Laminin subunit gamma-1                                             | LAMC1   | -1.84 | 5.83E-04 |
| Q9NZN3 | EH domain-containing protein 3                                      | EHD3    | -1.83 | 3.53E-03 |
| P36871 | Phosphoglucomutase-1                                                | PGM1    | -1.81 | 2.31E-03 |
| P05388 | 60S acidic ribosomal protein P0                                     | RPLP0   | -1.79 | 2.10E-03 |
| Q6NZI2 | Polymerase I and transcript release factor                          | PTRF    | -1.78 | 2.41E-03 |
| P12277 | Creatine kinase B-type                                              | CKB     | -1.77 | 1.09E-02 |
| P31150 | Rab GDP dissociation inhibitor alpha                                | GDI1    | -1.76 | 7.96E-03 |
| P62140 | Serine/threonine-protein phosphatase PP1-<br>beta catalytic subunit | PPP1CB  | -1.76 | 6.41E-03 |
| P35749 | Myosin-11                                                           | MYH11   | -1.75 | 3.46E-04 |
| Q9UL25 | Ras-related protein Rab-21                                          | RAB21   | -1.73 | 4.72E-03 |
| P21333 | Filamin-A                                                           | FLNA    | -1.73 | 3.57E-04 |
| Q969G5 | Protein kinase C delta-binding protein                              | PRKCDBP | -1.73 | 1.18E-02 |
| P39060 | Collagen alpha-1(XVIII) chain                                       | COL18A1 | -1.72 | 3.46E-04 |
| P63167 | Dynein light chain 1, cytoplasmic                                   | DYNLL1  | -1.70 | 3.39E-04 |
| Q63ZY3 | KN motif and ankyrin repeat domain-<br>containing protein 2         | KANK2   | -1.70 | 1.38E-02 |

**Supplemental Table 18. Overlap of Patho-Proteomic Fibrous Plaque Proteins in Human LAD (n=99) and AA (n=99) Samples** Twelve proteins were significantly ( $q \leq 0.05$ ) up-regulated in fibrous plaque enriched samples compared to normal samples in both the LAD and AA. With the exception of cathepsin Z, all of the up-regulated proteins were also identified as fibrous plaque proteins in both LAD and AA using CAM. Similarly, seven proteins were significantly down-regulated in fibrous plaque samples compared to normal.

| Uniprot ID | Protein                            | Gene   | LAD         |          | AA          |          |
|------------|------------------------------------|--------|-------------|----------|-------------|----------|
|            |                                    |        | Fold-change | q-value  | Fold-change | q-value  |
| P24821     | Tenascin                           | TNC    | 13.04       | 1.08E-03 | 3.17        | 2.70E-03 |
| P04114     | Apolipoprotein B-100               | APOB   | 3.65        | 6.26E-04 | 11.68       | 4.87E-03 |
| P13796     | Plastin-2                          | LCP1   | 3.87        | 9.80E-04 | 9.22        | 4.50E-04 |
| P07858     | Cathepsin B                        | CTSB   | 3.63        | 3.13E-04 | 5.99        | 4.84E-03 |
| P40121     | Macrophage-capping protein         | CAPG   | 2.72        | 6.89E-03 | 3.88        | 1.09E-02 |
| P35442     | Thrombospondin-2                   | THBS2  | 2.69        | 4.40E-04 | 3.82        | 1.36E-03 |
| P01031     | Complement C5                      | C5     | 1.89        | 1.58E-02 | 3.64        | 5.07E-03 |
| P31146     | Coronin-1A                         | CORO1A | 2.13        | 1.22E-02 | 3.30        | 3.13E-05 |
| P02649     | Apolipoprotein E                   | APOE   | 1.79        | 1.28E-02 | 3.06        | 2.06E-04 |
| O43866     | CD5 antigen-like                   | CD5L   | 2.10        | 1.22E-02 | 2.63        | 1.62E-02 |
| Q9UBR2     | Cathepsin Z                        | CTSZ   | 2.20        | 9.53E-04 | 2.51        | 1.40E-02 |
| P01871     | Ig mu chain C region               | IGHM   | 2.15        | 8.14E-03 | 2.43        | 2.07E-02 |
| P46821     | Microtubule-associated protein 1B  | MAP1B  | -1.90       | 4.59E-03 | -4.11       | 4.00E-07 |
| Q9HBL0     | Tensin-1                           | TNS1   | -2.01       | 5.58E-04 | -3.72       | 1.73E-05 |
| O43175     | D-3-phosphoglycerate dehydrogenase | PHGDH  | -2.09       | 2.77E-04 | -3.31       | 4.90E-06 |
| O75112     | LIM domain-binding protein 3       | LDB3   | -1.98       | 1.70E-02 | -2.48       | 3.29E-04 |
| P51911     | Calponin-1                         | CNN1   | -1.71       | 1.88E-03 | -2.26       | 6.30E-04 |
| P27816     | Microtubule-associated protein 4   | MAP4   | -1.78       | 1.28E-02 | -2.01       | 3.71E-04 |
| P30084     | Enoyl-CoA hydratase, mitochondrial | ECHS1  | -1.71       | 1.36E-03 | -1.87       | 2.10E-02 |

up-regulated

down-regulated

**Supplemental Table 19.** IPA Output for Analysis of Fibrous Plaque vs NL Marker Proteins  
with q-value  $\leq 0.01$

**<see Excel file: Supplemental Table 19.xlsx>**

## SUPPLEMENTAL REFERENCES

1. Strong JP, Malcom GT, McMahan CA, Tracy RE, Newman WP, 3rd, Herderick EE and Cornhill JF. Prevalence and extent of atherosclerosis in adolescents and young adults: implications for prevention from the Pathobiological Determinants of Atherosclerosis in Youth Study. *JAMA*. 1999;281:727-735.
2. Suna G, Wojakowski W, Lynch M, Barallobre-Barreiro J, Yin X, Mayr U, Baig F, Lu R, Fava M, Hayward R, Molenaar C, White SJ, Roleder T, Milewski KP, Gasior P, Buszman PP, Buszman P, Jahangiri M, Shanahan CM, Hill J and Mayr M. Extracellular Matrix Proteomics Reveals Interplay of Aggrecan and Aggrecanases in Vascular Remodeling of Stented Coronary Arteries. *Circulation*. 2018;137:166-183.
3. de Castro Bras LE, Ramirez TA, DeLeon-Pennell KY, Chiao YA, Ma Y, Dai Q, Halade GV, Hakala K, Weintraub ST and Lindsey ML. Texas 3-step decellularization protocol: looking at the cardiac extracellular matrix. *J Proteomics*. 2013;86:43-52.
4. Chambers MC, Maclean B, Burke R, Amodei D, Ruderman DL, Neumann S, Gatto L, Fischer B, Pratt B, Egertson J, Hoff K, Kessner D, Tasman N, Shulman N, Frewen B, Baker TA, Brusniak MY, Paulse C, Creasy D, Flashner L, Kani K, Moulding C, Seymour SL, Nuwaysir LM, Lefebvre B, Kuhlmann F, Roark J, Rainer P, Detlev S, Hemenway T, Huhmer A, Langridge J, Connolly B, Chadick T, Holly K, Eckels J, Deutsch EW, Moritz RL, Katz JE, Agus DB, MacCoss M, Tabb DL and Mallick P. A cross-platform toolkit for mass spectrometry and proteomics. *Nat Biotechnol*. 2012;30:918-920.
5. Craig R and Beavis RC. TANDEM: matching proteins with tandem mass spectra. *Bioinformatics*. 2004;20:1466-1467.
6. Geer LY, Markey SP, Kowalak JA, Wagner L, Xu M, Maynard DM, Yang X, Shi W and Bryant SH. Open mass spectrometry search algorithm. *J Proteome Res*. 2004;3:958-964.
7. Elias JE and Gygi SP. Target-decoy search strategy for increased confidence in large-scale protein identifications by mass spectrometry. *Nat Methods*. 2007;4:207-214.
8. Apweiler R, Bairoch A, Wu CH, Barker WC, Boeckmann B, Ferro S, Gasteiger E, Huang H, Lopez R, Magrane M, Martin MJ, Natale DA, O'Donovan C, Redaschi N and Yeh LS. UniProt: the Universal Protein knowledgebase. *Nucleic Acids Res*. 2004;32:D115-119.
9. Keller A, Eng J, Zhang N, Li XJ and Aebersold R. A uniform proteomics MS/MS analysis platform utilizing open XML file formats. *Mol Syst Biol*. 2005;1:2005.0017.
10. Keller A, Nesvizhskii AI, Kolker E and Aebersold R. Empirical statistical model to estimate the accuracy of peptide identifications made by MS/MS and database search. *Anal Chem*. 2002;74:5383-5392.
11. Shteynberg D, Deutsch EW, Lam H, Eng JK, Sun Z, Tasman N, Mendoza L, Moritz RL, Aebersold R and Nesvizhskii AI. iProphet: multi-level integrative analysis of shotgun proteomic data improves peptide and protein identification rates and error estimates. *Mol Cell Proteomics*. 2011;10:M111.007690.
12. Nesvizhskii AI, Keller A, Kolker E and Aebersold R. A statistical model for identifying proteins by tandem mass spectrometry. *Anal Chem*. 2003;75:4646-4658.
13. Vogel C and Marcotte EM. Label-free protein quantitation using weighted spectral counting. *Methods Mol Biol*. 2012;893:321-341.
14. Candès E and Recht B. Exact Matrix Completion via Convex Optimization. *Foundations of Computational mathematics* 2009;9.6:717-772.
15. Zhang B and Horvath S. A general framework for weighted gene co-expression network analysis. *Stat Appl Genet Mol Biol*. 2005;4:Article17.
16. Buettner F, Natarajan KN, Casale FP, Proserpio V, Scialdone A, Theis FJ, Teichmann SA, Marioni JC and Stegle O. Computational analysis of cell-to-cell heterogeneity in single-cell RNA-sequencing data reveals hidden subpopulations of cells. *Nat Biotechnol*. 2015;33:155-160.
17. Lake BB, Ai R, Kaeser GE, Salathia NS, Yung YC, Liu R, Wildberg A, Gao D, Fung HL, Chen S, Vijayaraghavan R, Wong J, Chen A, Sheng X, Kaper F, Shen R, Ronaghi M, Fan JB, Wang W, Chun J and Zhang K. Neuronal subtypes and diversity revealed by single-nucleus RNA sequencing of the human brain. *Science*. 2016;352:1586-1590.

18. Guintivano J, Aryee MJ and Kaminsky ZA. A cell epigenotype specific model for the correction of brain cellular heterogeneity bias and its application to age, brain region and major depression. *Epigenetics*. 2013;8:290-302.
19. Kuhn A, Thu D, Waldvogel HJ, Faull RL and Luthi-Carter R. Population-specific expression analysis (PSEA) reveals molecular changes in diseased brain. *Nat Methods*. 2011;8:945-947.
20. Rahmani E, Zaitlen N, Baran Y, Eng C, Hu D, Galanter J, Oh S, Burchard EG, Eskin E, Zou J and Halperin E. Sparse PCA corrects for cell type heterogeneity in epigenome-wide association studies. *Nat Methods*. 2016;13:443-445.
21. Chan T, Ma W, Chi C and Wang Y. A convex analysis framework for blind separation of non-negative sources. *IEEE Trans Signal Processing*. 2008;56:5120-5134.
22. Wang N, Hoffman EP, Chen L, Chen L, Zhang Z, Liu C, Yu G, Herrington DM, Clarke R and Wang Y. Mathematical modelling of transcriptional heterogeneity identifies novel markers and subpopulations in complex tissues. *Sci Rep*. 2016;6:18909.
23. Chen L, Chan TH, Choyke PL, Hillman EM, Chi CY, Bhujwala ZM, Wang G, Wang SS, Szabo Z and Wang Y. CAM-CM: a signal deconvolution tool for in vivo dynamic contrast-enhanced imaging of complex tissues. *Bioinformatics*. 2011;27:2607-2609.
24. Chen L, Choyke PL, Chan TH, Chi CY, Wang G and Wang Y. Tissue-specific compartmental analysis for dynamic contrast-enhanced MR imaging of complex tumors. *IEEE Trans Med Imaging*. 2011;30:2044-2058.
25. Frey BJ and Dueck D. Clustering by passing messages between data points. *Science*. 2007;315:972-976.
26. Boyle EI, Weng S, Gollub J, Jin H, Botstein D, Cherry JM and Sherlock G. GO::TermFinder--open source software for accessing Gene Ontology information and finding significantly enriched Gene Ontology terms associated with a list of genes. *Bioinformatics*. 2004;20:3710-3715.
27. Supek F, Bosnjak M, Skunca N and Smuc T. REVIGO summarizes and visualizes long lists of gene ontology terms. *PLoS One*. 2011;6:e21800.
28. Mitra K, Carvunis AR, Ramesh SK and Ideker T. Integrative approaches for finding modular structure in biological networks. *Nat Rev Genet*. 2013;14:719-732.
29. Hu JX, Thomas CE and Brunak S. Network biology concepts in complex disease comorbidities. *Nat Rev Genet*. 2016;17:615-629.
30. Hudson NJ, Dalrymple BP and Reverter A. Beyond differential expression: the quest for causal mutations and effector molecules. *BMC Genomics*. 2012;13:356.
31. Zhang B, Tian Y, Jin L, Li H, Shih Ie M, Madhavan S, Clarke R, Hoffman EP, Xuan J, Hilakivi-Clarke L and Wang Y. DDN: a caBIG(R) analytical tool for differential network analysis. *Bioinformatics*. 2011;27:1036-1038.
32. Tian Y, Zhang B, Hoffman EP, Clarke R, Zhang Z, Shih Ie M, Xuan J, Herrington DM and Wang Y. Knowledge-fused differential dependency network models for detecting significant rewiring in biological networks. *BMC Syst Biol*. 2014;8:87.
33. Tian Y, Zhang B, Hoffman EP, Clarke R, Zhang Z, Shih Ie M, Xuan J, Herrington DM and Wang Y. KDDN: an open-source Cytoscape app for constructing differential dependency networks with significant rewiring. *Bioinformatics*. 2015;31:287-289.
34. MacLean B, Tomazela DM, Shulman N, Chambers M, Finney GL, Frewen B, Kern R, Tabb DL, Liebler DC and MacCoss MJ. Skyline: an open source document editor for creating and analyzing targeted proteomics experiments. *Bioinformatics*. 2010;26:966-968.
35. Tibshirani R. Regression Shrinkage and Selection via the Lasso. *Journal of the Royal Statistical Society*. 1996;Series B, 58:267-288.
36. Zou H and Hastie T. Regularization and Variable Selection via the Elastic Net. *Journal of the Royal Statistical Society*. 2005;Series B, 67:301-320.
37. Zou H and Zhang H. On the Adaptive Elastic-Net with A Diverging Number of Parameters *Annals of Statistics*. 2009;37:1733-1751.
38. Efron B. Nonparametric Standard Errors and Confidence Intervals. *The Canadian Journal of Statistics* 1981;9:139-158.
